# Supplementary material for: G6PD and HBB polymorphisms in the Senegalese population: prevalence, correlation with clinical malaria
Source: PeerJ. 2022 Jul 5;10:e13487. doi: 10.7717/peerj.13487 (PMC9266585; doi:10.7717/peerj.13487)
Supplement: Supplemental Information 1 — Information about each participant: location, age, gender, malaria phenotype or control, haematological data, etc. [file peerj-10-13487-s001.xlsx]

## Sheet: Biological parameters
Number	patient's CODE	Locality	Recruitment period	Phenotype	Age	Sex	SURVIVAL	Length of stay in hospital	Parasitemia (P/µl)	Blood & Rhesus Group	Hb (g/100ml)	Hematocrit (%)	mean corpuscular volume: MCV (fL)	mean corpuscular hemoglobin MCH	mean corpuscular volume concentration MCHC (pg/cell)	White BC	Red BC	Platelets (x 103/µL)	Neutrophils (%)	Lymphocytes (%)	Monocytes (%)	Eosinophils (%)	Basophils (%)
1	NP03001	DAKAR	2003	Severe Malaria	18	M	SURVIVOR	6	34500	-	8.5	29	-	-	-	6	2.3	70	-	-	-	-	-
2	NP03002	DAKAR	2003	Severe Malaria	65	F	SURVIVOR	8	4184	-	13.4	42.8	-	-	-	5.5	5.23	23	-	-	-	-	-
3	NP03003	DAKAR	2003	Severe Malaria	27	F	SURVIVOR	0	4	-	5.32	0.81	-	-	-	40.7	13.3	12.9	-	-	-	-	-
4	NP03004	DAKAR	2003	Severe Malaria	26	M	SURVIVOR	4	457	-	11.7	35	-	-	-	10.9	4.57	297	-	-	-	-	-
5	NP03005	DAKAR	2003	Severe Malaria	24	M	SURVIVOR	5	431000	-	13.3	40.1	-	-	-	5.3	4.31	53	-	-	-	-	-
6	NP03006	DAKAR	2003	Severe Malaria	12	F	DEATH	1	367500	-	9.7	35	-	-	-	12.2	3.75	90	-	-	-	-	-
7	NP03007	DAKAR	2003	Severe Malaria	27	M	SURVIVOR	18	260	-	7.6	29.2	-	-	-	32.9	2.6	485	-	-	-	-	-
8	NP03008	DAKAR	2003	Severe Malaria	25	F	DEATH	2	36840	-	9.5	26.7	-	-	-	16.7	3.07	29	-	-	-	-	-
9	NP03009	DAKAR	2003	Severe Malaria	38	F	DEATH	5	74700	-	8.3	24.5	-	-	-	5.7	2.49	53	-	-	-	-	-
10	NP03010	DAKAR	2003	Severe Malaria	48	M	DEATH	1	10350	-	11.3	34.5	-	-	-	13.2	3.45	210	-	-	-	-	-
11	NP03011	DAKAR	2003	Severe Malaria	39	M	DEATH	3	206340	-	10	32.9	-	-	-	8.7	3.62	20	-	-	-	-	-
12	NP03012	DAKAR	2003	Severe Malaria	13	M	SURVIVOR	9	36600	-	8.4	27.6	-	-	-	13.8	3.66	980	-	-	-	-	-
13	NP03013	DAKAR	2003	Severe Malaria	71	M	DEATH	27	238680	-	11.5	36.1	-	-	-	18.3	4.59	95	-	-	-	-	-
14	NP030014	DAKAR	2003	Severe Malaria	18	M	SURVIVOR	6	37200	-	11.2	33.9	-	-	-	8.6	3.72	50	-	-	-	-	-
15	NP03015	DAKAR	2003	Severe Malaria	32	M	DEATH	8	294	-	8.8	26.9	-	-	-	9.6	2.94	52	-	-	-	-	-
16	NP03016	DAKAR	2003	Severe Malaria	22	M	SURVIVOR	14	86265	-	11	33.1	-	-	-	16.5	4.05	35	-	-	-	-	-
17	NP03017	DAKAR	2003	Severe Malaria	12	F	SURVIVOR	4	43125	-	7.8	24.9	-	-	-	4.6	3.45	56	-	-	-	-	-
18	NP03018	DAKAR	2003	Severe Malaria	10	M	SURVIVOR	14	120300	-	11.7	33.3	-	-	-	21.7	4.01	357	-	-	-	-	-
19	NP03019	DAKAR	2003	Severe Malaria	73	F	SURVIVOR	8	137500	-	12.2	37.4	-	-	-	8.5	5.5	12	-	-	-	-	-
20	NP03020	DAKAR	2003	Severe Malaria	28	M	SURVIVOR	4	250	-	8.4	25.9	-	-	-	27	2.5	87	-	-	-	-	-
21	NP03021	DAKAR	2003	Severe Malaria	26	M	SURVIVOR	7	225000	-	11.7	31	-	-	-	18	4.5	85	-	-	-	-	-
22	NP03022	DAKAR	2003	Severe Malaria	28	M	SURVIVOR	8	122040	-	10.1	34.2	-	-	-	7.9	4.52	26	-	-	-	-	-
23	NP03023	DAKAR	2003	Severe Malaria	22	F	DEATH	1	264000	-	7	21.4	-	-	-	7.2	2.4	9	-	-	-	-	-
24	NP03024	DAKAR	2003	Severe Malaria	17	M	SURVIVOR	1	78000	-	10.1	20	-	-	-	7	3.9	211	-	-	-	-	-
25	NP03025	DAKAR	2003	Severe Malaria	16	M	SURVIVOR	5	47676	-	12.11	34.2	-	-	-	15	4.11	21	-	-	-	-	-
26	NP03026	DAKAR	2003	Severe Malaria	54	M	DEATH	8	124000	-	10.7	28.6	-	-	-	18.1	3.1	22	-	-	-	-	-
27	NP03027	DAKAR	2003	Severe Malaria	9	F	SURVIVOR	6	10250	-	12.2	32.7	-	-	-	14.9	4.1	98	-	-	-	-	-
28	NP03028	DAKAR	2003	Severe Malaria	15	F	SURVIVOR	3	57250	-	6	19.2	-	-	-	3	2.29	35	-	-	-	-	-
29	NP03029	DAKAR	2003	Severe Malaria	24	M	SURVIVOR	7	548800	-	11.7	30.6	-	-	-	9.3	3.43	45	-	-	-	-	-
30	NP03030	DAKAR	2003	Severe Malaria	67	F	SURVIVOR	8	126500	-	15	28.8	-	-	-	3.6	5.5	93	-	-	-	-	-
31	NP03031	DAKAR	2003	Severe Malaria	25	M	SURVIVOR	6	172800	-	11.2	36	-	-	-	9.7	4.32	58	-	-	-	-	-
32	NP03032	DAKAR	2003	Severe Malaria	26	F	SURVIVOR	20	3860	-	11.6	37.4	-	-	-	11.8	3.86	26	-	-	-	-	-
33	NP03033	DAKAR	2003	Severe Malaria	8	M	SURVIVOR	4	94326	-	9.7	31.2	-	-	-	9.7	3.98	258	-	-	-	-	-
34	NP03034	DAKAR	2003	Severe Malaria	41	F	DEATH	1	139810	-	9.8	30.6	-	-	-	11.2	4.1	51	-	-	-	-	-
35	NP03035	DAKAR	2003	Severe Malaria	44	F	SURVIVOR	7	33220	-	8	24.1	-	-	-	18.4	3.02	34	-	-	-	-	-
36	NP03036	DAKAR	2003	Severe Malaria	26	F	SURVIVOR	4	353	-	10.1	30	-	-	-	10.8	3.53	90	-	-	-	-	-
37	NP03037	DAKAR	2003	Severe Malaria	40	F	SURVIVOR	12	150750	-	8.5	28	-	-	-	7.9	2.5	12	-	-	-	-	-
38	NP03038	DAKAR	2003	Severe Malaria	17	M	SURVIVOR	8	52140	-	8.4	26.2	-	-	-	23.8	3.16	19	-	-	-	-	-
39	NP03039	DAKAR	2003	Severe Malaria	18	M	SURVIVOR	5	30723	-	8.4	27.1	-	-	-	9.2	3.99	171	-	-	-	-	-
40	NP03040	DAKAR	2003	Severe Malaria	17	F	SURVIVOR	6	520	-	2.1	43.8	-	-	-	6.7	0.65	69	-	-	-	-	-
41	NP03041	DAKAR	2003	Severe Malaria	38	F	SURVIVOR	9	1640	-	10.9	26.5	-	-	-	8	4.1	11	-	-	-	-	-
42	NP03042	DAKAR	2003	Severe Malaria	32	F	SURVIVOR	3	162164	-	7.4	23	-	-	-	10	2.84	166	-	-	-	-	-
43	NP03043	DAKAR	2003	Severe Malaria	17	M	SURVIVOR	5	92868	-	10.1	32.9	-	-	-	12.5	4.36	44	-	-	-	-	-
44	NP03044	DAKAR	2003	Severe Malaria	51	F	SURVIVOR	6	1592	-	10	36.7	-	-	-	4.3	3.98	99	-	-	-	-	-
45	NP03045	DAKAR	2003	Severe Malaria	38	M	SURVIVOR	16	15147	-	8.6	26	-	-	-	7	2.97	185	-	-	-	-	-
46	NP03046	DAKAR	2003	Severe Malaria	28	M	SURVIVOR	5	489	-	10	31.2	-	-	-	14.1	4.89	32	-	-	-	-	-
47	NP03047	DAKAR	2003	Severe Malaria	17	M	SURVIVOR	6	3756	-	7.9	25	-	-	-	5.5	3.13	81	-	-	-	-	-
48	NP03048	DAKAR	2003	Severe Malaria	31	F	SURVIVOR	6	410	-	10.1	27.1	-	-	-	10.3	4.1	27	-	-	-	-	-
49	NP03049	DAKAR	2003	Severe Malaria	11	M	DEATH	1	43500	-	8.6	27.1	-	-	-	10.3	3.48	163	-	-	-	-	-
50	NP03050	DAKAR	2003	Severe Malaria	13	F	SURVIVOR	6	716	-	10	31.7	-	-	-	6.1	3.58	353	-	-	-	-	-
51	NP03051	DAKAR	2003	Severe Malaria	19	M	DEATH	6	477	-	10.5	39.3	-	-	-	19.1	4.77	119	-	-	-	-	-
52	NP03052	DAKAR	2003	Severe Malaria	22	M	SURVIVOR	9	15500	-	6.7	20.9	-	-	-	15.4	3.1	201	-	-	-	-	-
53	NP04001	DAKAR	2004	Severe Malaria	21	M	DEATH	3	243040	-	11.8	31.3	-	-	-	14.75	4.9	64	-	-	-	-	-
54	NP04002	DAKAR	2004	Severe Malaria	44	M	SURVIVOR	16	35010	-	11.1	30.7	-	-	-	11.1	3.89	149	-	-	-	-	-
55	NP04003	DAKAR	2004	Severe Malaria	21	F	DEATH	5	136400	-	8.3	22.2	-	-	-	16.3	2.48	84	-	-	-	-	-
56	NP04004	DAKAR	2004	Severe Malaria	18	M	SURVIVOR	6	37980	-	5.5	16.3	-	-	-	11.6	2.11	75	-	-	-	-	-
57	NP04005	DAKAR	2004	Severe Malaria	18	F	DEATH	10	401940	-	10.4	31.6	-	-	-	19.2	4.06	74	-	-	-	-	-
58	NP04006	DAKAR	2004	Severe Malaria	17	M	SURVIVOR	6	359100	-	12.2	38.8	-	-	-	7.95	5.7	72	-	-	-	-	-
59	NP04007	DAKAR	2004	Severe Malaria	23	M	DEATH	3	322	-	8.8	23.9	-	-	-	20.42	3.22	54	-	-	-	-	-
60	NP04008	DAKAR	2004	Severe Malaria	40	M	SURVIVOR	30	9870	-	3.5	10.5	-	-	-	10.5	1.41	69	-	-	-	-	-
61	NP04009	DAKAR	2004	Severe Malaria	16	M	SURVIVOR	7	12060	-	10.8	30.8	-	-	-	7.25	4.02	80	-	-	-	-	-
62	NP04010	DAKAR	2004	Severe Malaria	22	M	SURVIVOR	8	422220	-	12.2	35.6	-	-	-	5.51	4.54	38	-	-	-	-	-
63	NP04011	DAKAR	2004	Severe Malaria	18	M	SURVIVOR	4	57840	-	11	35	-	-	-	4.43	4.82	154	-	-	-	-	-
64	NP04012	DAKAR	2004	Severe Malaria	46	F	DEATH	9	30720	-	9.5	27.2	-	-	-	3.52	3.84	80	-	-	-	-	-
65	NP04013	DAKAR	2004	Severe Malaria	15	M	SURVIVOR	5	250750	-	11.5	34	-	-	-	11.58	4.25	25	-	-	-	-	-
66	NP04014	DAKAR	2004	Severe Malaria	23	M	SURVIVOR	6	156090	-	10.5	30.6	-	-	-	11.26	3.63	38	-	-	-	-	-
67	NP04015	DAKAR	2004	Severe Malaria	47	M	SURVIVOR	4	3990	-	12	36.3	-	-	-	4.94	3.99	157	-	-	-	-	-
68	NP04016	DAKAR	2004	Severe Malaria	29	M	SURVIVOR	4	55000	-	14	40.8	-	-	-	5.03	5.5	67	-	-	-	-	-
69	NP04017	DAKAR	2004	Severe Malaria	16	M	SURVIVOR	6	161820	-	14	40.4	-	-	-	8.62	5.22	33	-	-	-	-	-
70	NP04018	DAKAR	2004	Severe Malaria	29	M	SURVIVOR	8	41520	-	14.4	41.3	-	-	-	8.17	5.19	36	-	-	-	-	-
71	NP04019	DAKAR	2004	Severe Malaria	12	F	SURVIVOR	4	231400	-	11	26.8	-	-	-	18.48	3.56	75	-	-	-	-	-
72	NP04020	DAKAR	2004	Severe Malaria	18	M	SURVIVOR	16	218960	-	13.9	39.9	-	-	-	9.24	4.76	48	-	-	-	-	-
73	NP04021	DAKAR	2004	Severe Malaria	63	F	SURVIVOR	3	80480	-	12.6	37.7	-	-	-	4.21	5.03	169	-	-	-	-	-
74	NP04022	DAKAR	2004	Severe Malaria	32	F	DEATH	3	118180	-	9	21.2	-	-	-	2.39	3.11	18	-	-	-	-	-
75	NP04023	DAKAR	2004	Severe Malaria	54	M	SURVIVOR	3	52470	-	12.9	38.8	-	-	-	5.51	5.83	39	-	-	-	-	-
76	NP04024	DAKAR	2004	Severe Malaria	25	F	SURVIVOR	4	115500	-	14.3	40	-	-	-	3.71	5.5	76	-	-	-	-	-
77	NP04025	DAKAR	2004	Severe Malaria	45	M	SURVIVOR	7	195780	-	11	35.5	-	-	-	12.6	5.02	467	-	-	-	-	-
78	NP04026	DAKAR	2004	Severe Malaria	23	M	SURVIVOR	14	483390	-	10.7	31	-	-	-	8.4	3.69	41	-	-	-	-	-
79	NP04027	DAKAR	2004	Severe Malaria	34	M	DEATH	6	424840	-	12	32.7	-	-	-	7.49	4.94	249	-	-	-	-	-
80	NP04028	DAKAR	2004	Severe Malaria	74	F	DEATH	2	0	-	9	20	-	-	-	18.9	2.99	187	-	-	-	-	-
81	NP04029	DAKAR	2004	Severe Malaria	32	M	DEATH	6	101970	-	8.7	24.6	-	-	-	13.68	3.09	63	-	-	-	-	-
82	NP04030	DAKAR	2004	Severe Malaria	22	F	SURVIVOR	25	29200	-	9.6	27.5	-	-	-	20.4	3.65	80	-	-	-	-	-
83	NP04031	DAKAR	2004	Severe Malaria	30	F	DEATH	8	150060	-	9.41	27	-	-	-	32	3.66	99	-	-	-	-	-
84	NP04032	DAKAR	2004	Severe Malaria	41	F	DEATH	8	221020	-	7.3	21.9	-	-	-	7.29	2.57	32	-	-	-	-	-
85	NP04033	DAKAR	2004	Severe Malaria	51	M	SURVIVOR	6	137000	-	7.9	25	-	-	-	4.89	2.74	160	-	-	-	-	-
86	NP04034	DAKAR	2004	Severe Malaria	31	M	SURVIVOR	11	316140	-	14.1	41.2	-	-	-	6.15	4.79	71	-	-	-	-	-
87	NP04035	DAKAR	2004	Severe Malaria	14	F	SURVIVOR	4	277920	-	12	34	-	-	-	11.68	3.86	159	-	-	-	-	-
88	NP04036	DAKAR	2004	Severe Malaria	13	F	SURVIVOR	3	490	-	12.7	32	-	-	-	7.17	4.9	614	-	-	-	-	-
89	NP04037	DAKAR	2004	Severe Malaria	50	M	SURVIVOR	13	229890	-	8.4	24.2	-	-	-	7.43	2.91	122	-	-	-	-	-
90	NP04038	DAKAR	2004	Severe Malaria	38	F	SURVIVOR	39	119680	-	4.8	22	-	-	-	16.08	1.76	108	-	-	-	-	-
91	NP04039	DAKAR	2004	Severe Malaria	35	M	DEATH	4	358660	-	13.4	40	-	-	-	9.3	4.54	164	-	-	-	-	-
92	NP04040	DAKAR	2004	Severe Malaria	32	M	SURVIVOR	37	15280	-	9.9	29.8	-	-	-	8.06	3.82	109	-	-	-	-	-
93	NP04041	DAKAR	2004	Severe Malaria	20	M	SURVIVOR	7	10890	-	10.2	28.8	-	-	-	9.7	3.63	42	-	-	-	-	-
94	NP04042	DAKAR	2004	Severe Malaria	23	M	SURVIVOR	15	256650	-	11.7	34.8	-	-	-	7.47	4.35	56	-	-	-	-	-
95	NP04043	DAKAR	2004	Severe Malaria	24	F	SURVIVOR	5	348160	-	12.3	39.3	-	-	-	12.9	5.12	147	-	-	-	-	-
96	NP04044	DAKAR	2004	Severe Malaria	39	M	SURVIVOR	5	21180	-	10.7	38	-	-	-	9.8	3.53	169	-	-	-	-	-
97	NP04045	DAKAR	2004	Severe Malaria	16	M	SURVIVOR	4	459	-	11.9	36.1	-	-	-	14.51	4.59	751	-	-	-	-	-
98	NP04046	DAKAR	2004	Severe Malaria	67	F	SURVIVOR	4	171000	-	10.1	23.3	-	-	-	5.66	3.42	107	-	-	-	-	-
99	NP04047	DAKAR	2004	Severe Malaria	24	M	SURVIVOR	8	10110	-	9.7	28.7	-	-	-	6.2	3.37	65	-	-	-	-	-
100	NP04048	DAKAR	2004	Severe Malaria	17	F	SURVIVOR	3	360	-	9.5	30.5	-	-	-	8.82	3.6	334	-	-	-	-	-
101	NP04049	DAKAR	2004	Severe Malaria	27	M	SURVIVOR	4	17400	-	9.9	27.4	-	-	-	24.56	3.48	806	-	-	-	-	-
102	NP04050	DAKAR	2004	Severe Malaria	22	F	SURVIVOR	4	17150	-	9.6	29	-	-	-	14.78	3.43	140	-	-	-	-	-
103	NP04051	DAKAR	2004	Severe Malaria	26	F	DEATH	9	135000	-	8.8	26.4	-	-	-	10.04	3	39	-	-	-	-	-
104	NP04052	DAKAR	2004	Severe Malaria	30	F	SURVIVOR	4	104640	-	15.9	46.1	-	-	-	8.66	6.54	61	-	-	-	-	-
105	NP04053	DAKAR	2004	Severe Malaria	16	M	SURVIVOR	15	37600	-	8	46	-	-	-	9.54	4.7	278	-	-	-	-	-
106	NP04054	DAKAR	2004	Severe Malaria	48	F	DEATH	5	44800	-	10.5	33.3	-	-	-	3.76	4.48	330	-	-	-	-	-
107	NP04055	DAKAR	2004	Severe Malaria	19	M	DEATH	2	86020	-	7.9	24.9	-	-	-	27.95	3.74	219	-	-	-	-	-
108	NP04056	DAKAR	2004	Severe Malaria	21	M	SURVIVOR	5	66780	-	8.7	25.3	-	-	-	6.91	3.18	339	-	-	-	-	-
109	NP04057	DAKAR	2004	Severe Malaria	20	M	SURVIVOR	5	127500	-	12.8	37	-	-	-	4.69	5.1	65.1	-	-	-	-	-
110	NP04058	DAKAR	2004	Severe Malaria	24	M	SURVIVOR	10	-	-	11	31	-	-	-	6	5	234	-	-	-	-	-
111	NP04059	DAKAR	2004	Severe Malaria	25	F	DEATH	10	77400	-	11.1	33.4	-	-	-	15.03	5.16	467	-	-	-	-	-
112	NP04060	DAKAR	2004	Severe Malaria	21	F	SURVIVOR	11	-	-	10.5	32	-	-	-	8.2	4	261	-	-	-	-	-
113	NP05001	DAKAR	2005	Severe Malaria	14	M	SURVIVOR	7	-	-	10	29	-	-	-	9	3.9	345	-		-	-	-
114	NP05002	DAKAR	2005	Severe Malaria	18	M	DEATH	-	-	-	12.7	36.7	-	-	-	13.7	4.4	135	-	-	-	-	-
115	NP05003	DAKAR	2005	Severe Malaria	40	M	DEATH	3	-	-		25.5	-	-	-	15	2.93	23	-	-	-	-	-
116	NP05004	DAKAR	2005	Severe Malaria	40	M	DEATH	3	-	-	9.1	25.5	-	-	-	15	2.93	23	-		-	-	-
117	NP05005	DAKAR	2005	Severe Malaria	18	M	SURVIVOR	5	-	-	12.1	33.4	-	-	-	3.6	4.6	52	-		-	-	-
118	NP05006	DAKAR	2005	Severe Malaria	50	M	DEATH	1	-	-	11.2	29.7	-	-	-	87	2.95	3.1	-		-	-	-
119	NP05007	DAKAR	2005	Severe Malaria	17	M	DEATH	9	-	-	9.4	29.7	-	-	-	12.3	3.8	36	-	-	-	-	-
120	NP05008	DAKAR	2005	Severe Malaria	11	M	DEATH	5	-	-	6.3	18.6				15	2.42	420	-	-	-	-	-
121	NP05009	DAKAR	2005	Severe Malaria	55	M	SURVIVOR	9	-	-	13.2	39.5	-	-	-	8.8	4.73	40	-		-	-	-
122	NP05010	DAKAR	2005	Severe Malaria	27	M	SURVIVOR	-	-	-	12.9	38.2	-	-	-	4	4.34	13	-		-	-	-
123	NP05011	DAKAR	2005	Severe Malaria	20	M	SURVIVOR	6	-	-	36.6	36.6	-	-	-	6.1	4.3	134	-		-	-	-
124	NP05012	DAKAR	2005	Severe Malaria	28	M	SURVIVOR	30	-	-	11.4	33.7	-	-	-	3.9	4.05	73	-		-	-	-
125	NP05013	DAKAR	2005	Severe Malaria	33	M	SURVIVOR	7	-	-	11.9	35.2	-	-	-	5.8	4.1	50	-		-	-	-
126	NP05014	DAKAR	2005	Severe Malaria	75	M	SURVIVOR	-	-	-	13.1	36.3	-	-	-	5.9	3.9	34	-		-	-	-
127	NP05015	DAKAR	2005	Severe Malaria	16	F	SURVIVOR	9	-	-	10.3	31.9	-	-	-	8.4	3.5	256	-		-	-	-
128	NP05016	DAKAR	2005	Severe Malaria	28	M	-	22	-	-	11.7	-	-	-	-	10	4.3	48	-		-	-	-
129	NP05017	DAKAR	2005	Severe Malaria	43	M	SURVIVOR	3	-	-	12.8	35.4	-	-	-	-	3.9	57	-		-	-	-
130	NP05018	DAKAR	2005	Severe Malaria	25	M	DEATH	15	-	-	11.2	31.9	-	-	-	14.2	37.4	37.8	-		-	-	-
131	NP05019	DAKAR	2005	Severe Malaria	70	M	SURVIVOR	5	-	-	13.9	42.5	-	-	-	9.4	4.9	70	-		-	-	-
132	NP05020	DAKAR	2005	Severe Malaria	18	M	SURVIVOR	11	-	-	-	31.2	-	-	-	3.9	-	147	-		-	-	-
133	NP05021	DAKAR	2005	Severe Malaria	35	M	SURVIVOR	14	-	-	8.1	24.2	-	-	-	2.81	8.1	46	-	-	-	-	-
134	NP05022	DAKAR	2005	Severe Malaria	50	M	SURVIVOR	4	-	-	7.6	22.7	-	-	-	5	2.39	62.3	-	-	-	-	-
135	NP05024	DAKAR	2005	Severe Malaria	35	M	SURVIVOR	11	-	-	-	36.8	-	-	-	7.6	4.15	131	-		-	-	-
136	NP05025	DAKAR	2005	Severe Malaria	17	F	DEATH	6	-	-	5.7	16.9	-	-	-	9.8	2.22	53	-		-	-	-
137	NP05026	DAKAR	2005	Severe Malaria	9	F	SURVIVOR	3	-	-	6.9	18.5	-	-	-	8.1	2.42	39	-		-	-	-
138	NP12001	DAKAR	2005	Severe Malaria	20	M	SURVIVOR	-	-	-	-	-	-	-	-	-	-	-	-	-	-	-	-
139	NP12005	DAKAR	2012	Severe Malaria	16	M	SURVIVOR	4	-	-	7.3	-	-	-	-	16.7	2.68	70	-	-	-	-	-
140	NP12006	DAKAR	2012	Severe Malaria	53	M	DEATH	4	-	-	-	33.1	-	-	-	-	3.88	-	-		-	-	-
141	NP12007	DAKAR	2012	Severe Malaria	12	F	DEATH	11	-	-	11.6	33.4	-	-	-	19	4.62	40	-	-	-	-	-
142	NP12008	DAKAR	2012	Severe Malaria	25	F	SURVIVOR	6	-	-	5.6		-	-	-	-	-	49	-	-	-	-	-
143	NP12009	DAKAR	2012	Severe Malaria	36	F	DEATH	2	-	-	6.9	21.8	-	-	-	5.2	2.32	127	-	-	-	-	-
144	NP12010	DAKAR	2012	Severe Malaria	50	F	SURVIVOR	6	-	-	12.2	-	-	-	-	14.7	-	50	-		-	-	-
145	NP12011	DAKAR	2012	Severe Malaria	50	M	SURVIVOR	17	-	-	11.1	-	-	-	-	3.7	-	86	-		-	-	-
146	NP12012	DAKAR	2012	Severe Malaria	52	F	DEATH	21	-	-	7.5	22.4	-	-	-	11.6	2.77	43	-	-	-	-	-
147	NP12013	DAKAR	2012	Severe Malaria	18	M	SURVIVOR	9	-	-	7	-				9.78	-	66	-	-	-	-	-
148	NP12014	DAKAR	2012	Severe Malaria	15	M	SURVIVOR	12	-	-	7.8	-				22	-	49	-	-	-	-	-
149	NP12016	DAKAR	2012	Severe Malaria					-	-		-	-	-	-	-	-	-	-	-	-	-	-
150	NP12018	DAKAR	2012	Severe Malaria					-	-		-	-	-	-	-	-	-	-	-	-	-	-
151	TA12001	TAMABACOUNDA	2012	Severe Malaria	6	M	SURVIVOR	-	12800	A+	6.6	19.4	76.8	26.1	34	9.16	2.53	103	58.3	35.1	5.4	0.7	0.5
152	TA12004	TAMABACOUNDA	2012	Severe Malaria	8	M	SURVIVOR	-	116000	O+	11.5	34.4	64.4	21.5	33.4	6.5	5.34	37	64.3	25.2	7.7	0.2	2.6
153	TA12005	TAMABACOUNDA	2012	Severe Malaria	1	M	SURVIVOR	-	7047	O+	4.3	12.7	73.1	24.7	33.8	10.31	1.74	103	40.6	4.9	8.8	0.1	1.6
154	TA12006	TAMABACOUNDA	2012	Severe Malaria	2	M	SURVIVOR	-	14545	B+	2.6	7.5	73.1	25.5	34.9	22.87	1.02	317	45.5	46.9	5.5	0.6	1.5
155	TA12007	TAMABACOUNDA	2012	Severe Malaria	2.5	F	SURVIVOR	-	945	A+	4.7	12.7	85.4	31.5	36.9	13.87	1.49	25	-	-	-	-	-
156	TA12009	TAMABACOUNDA	2012	Severe Malaria	6	M	SURVIVOR	-	1177	-	12.1	36.2	78.4	26.2	33.4	23.33	4.62	161	70.6	16.9	11.8	0.2	0.5
157	TA12012	TAMABACOUNDA	2012	Severe Malaria	4	M	SURVIVOR	-	949	O+	8.3	23.6	70.8	24.9	35.2	12.41	3.33	87	53.5	38.4	7.3	0.3	0.5
158	TA12013	TAMABACOUNDA	2012	Severe Malaria	1.5	M	SURVIVOR	-	199200	-	4.1	8.9	38.7	17.9	46.3	1.9	2.29	153	46.4	39.8	13.8	0.1	0.7
159	TA12016	TAMABACOUNDA	2012	Severe Malaria	1.5	F	DEATH	-	344	-	2.5	9.5	93.9	24.8	26.4	6.67	1.01	34	30	65.7	1.01	2.5	0.8
160	TA12018	TAMABACOUNDA	2012	Severe Malaria	1	F	SURVIVOR	-	266	B+	7.5	22.5	69.3	23.1	33.3	12.09	3.25	79	44.9	48.5	5.2	0.9	0.5
161	TA12023	TAMABACOUNDA	2012	Severe Malaria	10	F	SURVIVOR	-	189	-	9.7	30	88	28.4	32.3	11.59	3.41	179	79	14	2.5	4.2	0.3
162	TA12024	TAMABACOUNDA	2012	Severe Malaria	3	F	SURVIVOR	-	1125	-	4.9	17.8	82.3	22.7	27.6	12.25	2.16	163	62.8	31.8	2.1	2.7	0.6
163	TA12025	TAMABACOUNDA	2012	Severe Malaria	4	M	SURVIVOR	-	30759	-	4.2	13.3	75.1	23.7	31.6	17.2	1.8	31.6	78.1	16.8	2.9	1.8	0.4
164	TA12031	TAMABACOUNDA	2012	Severe Malaria	0	-	SURVIVOR	-	1728	O+	16.5	48.5	100.3	34.1	34	11.2	4.8	34	63.7	26.6	9.1	0.3	0.3
165	TA12032	TAMABACOUNDA	2012	Severe Malaria	0	-	SURVIVOR	-	1972	O+	17.1	47.8	105	37.7	35.2	7.13	4.54	276	57.2	34.2	2.8	5.3	0.5
166	TA12033	TAMABACOUNDA	2012	Severe Malaria	0.3	M	SURVIVOR	-	125	-	10.1	30.8	71.7	23.5	32.8	11.61	4.3	491	6	91.2	1.8	0.9	0.1
167	TA12034	TAMABACOUNDA	2012	Severe Malaria	1.3	F	SURVIVOR	-	61538	A -	7.3	23.8	67.1	20.6	30.6	17.21	3.55	24	51.2	43.3	3.2	1.4	0.9
168	TA12035	TAMABACOUNDA	2012	Severe Malaria	4	M	SURVIVOR	-	217	O+	6.7	21.3	63.8	20	31.4	10.5	3.34	185	40.9	36.6	22.5	0	0
169	TA12036	TAMABACOUNDA	2012	Severe Malaria	10	F	SURVIVOR	-	655	-	-	-	-	-	-	-	-	-	-	-	-	-	-
170	TA12037	TAMABACOUNDA	2012	Severe Malaria	9	M	SURVIVOR	-	41300	O+	7.6	25.2	82.7	24.9	30.1	6.02	3.05	173	76.7	19.3	2.4	0.8	0.8
171	TA12038	TAMABACOUNDA	2012	Severe Malaria	1.8	M	SURVIVOR	-	349	B+	6.7	23.8	53.4	15	28.1	20.34	4.46	502	46.1	48.8	4.1	0.8	0.2
172	TA12040	TAMABACOUNDA	2012	Severe Malaria	0	F	SURVIVOR	-	2355	B+	13.5	45	127	38.1	30	20.86	3.54	322	74.1	22.6	2.1	0.9	0.3
173	TA12041	TAMABACOUNDA	2012	Severe Malaria	2.5	F	SURVIVOR	-	3246	O+	10.8	31.7	79.2	27	34.1	3.57	4	74	59.9	35.6	2.3	1.3	0.9
174	TA12042	TAMABACOUNDA	2012	Severe Malaria	27	M	SURVIVOR	-	810	-	15	45.8	84.3	27.6	32.8	3.83	5.43	178	43.5	45	6.6	4.3	0.6
175	TA12043	TAMABACOUNDA	2012	Severe Malaria	0	-	SURVIVOR	-	808	O+	14.6	41	112	40	35.6	10.79	3.65	43	75.4	18.4	5.4	0.8	0.4
176	TA12044	TAMABACOUNDA	2012	Severe Malaria	10	F	SURVIVOR	-	417	O+	7.2	20.1	78.8	28.2	35.8	26.23	2.55	50	52.1	44.7	2.3	0.5	0.4
177	TA12045	TAMABACOUNDA	2012	Severe Malaria	0	-	SURVIVOR	-	1095	A+	14.6	41.4	101.6	35.9	35.3	9.83	4.07	371	48.7	34	10.21	6.9	0.2
178	TA12048	TAMABACOUNDA	2012	Severe Malaria	13	M	SURVIVOR	-	833	O+	4.5	13.2	83.5	28.5	34.1	19.81	1.58	182	83.4	15.1	1	0.5	0
179	TA12049	TAMABACOUNDA	2012	Severe Malaria	4	M	SURVIVOR	-	8421	O+	3.5	10.3	78.7	26.7	33.9	14.92	1.31	93	735	16.8	6.6	2.2	0.9
180	TA12050	TAMABACOUNDA	2012	Severe Malaria	1.2	M	SURVIVOR	-	-	B+	9.6	30.3	67.8	21.5	31.7	5.73	4.47	348	30.7	55.7	9.9	2.7	1
181	TA12052	TAMABACOUNDA	2012	Severe Malaria	5	M	SURVIVOR	-	1762	O+	7.3	19.9	74.4	27.3	36.7	8.36	2.67	154	37.5	51.8	9.6	0.9	0.2
182	TA12053	TAMABACOUNDA	2012	Severe Malaria	0	-	SURVIVOR	-	581	-	14.4	40.8	104.2	36.7	35.3	15.63	3.92	287	56.8	34	5.6	3.2	0.4
183	TA12058	TAMABACOUNDA	2012	Severe Malaria	3	M	SURVIVOR	-	11586	B+	6.4	22.8	84.9	23.8	28	7.27	2.69	212	71.1	22	6.1	0.2	0.6
184	TA12068	TAMABACOUNDA	2012	Severe Malaria	9	M	SURVIVOR	-	320	-	10.6	31.4	76.4	25.8	33.8	12.71	4.81	380	91.2	3.3	4.9	0.4	0.2
185	TA12080	TAMABACOUNDA	2012	Severe Malaria	32	F	SURVIVOR	-	2105	B+	2.5	7.1	99.3	34.7	35	1.57	0.72	22	29.2	67.3	2	1.1	0.4
186	TA12081	TAMABACOUNDA	2012	Severe Malaria	0	F	SURVIVOR	-	1195	O+	20.4	59	105	36.4	34.4	8.89	5.6	103	46.2	45.2	6.1	2.3	0.2
187	TA12083	TAMABACOUNDA	2012	Severe Malaria	6	F	SURVIVOR	-	120	O+	3.5	10.5	72.3	24.1	33.4	8.89	1.45	103	63.8	31.5	2.1	2.3	0.3
188	TA12084	TAMABACOUNDA	2012	Severe Malaria	18	F	SURVIVOR	-	491	O -	11.8	37.9	67	20.8	31.1	24.06	5.66	62	94.6	3.1	2.1	0.1	0.1
189	TA12094	TAMABACOUNDA	2012	Severe Malaria	1	F	SURVIVOR	-	2120	-	9.7	31	78.6	24.6	31.3	20.75	3.94	169	46.3	48	4.8	0.5	0.4
190	TA12095	TAMABACOUNDA	2012	Severe Malaria	20	F	SURVIVOR	-	1828	-	8.3	26	78.6	25.1	31.9	12.44	3.94	763	39.9	35.5	22.9	0.9	0.8
191	TA12097	TAMABACOUNDA	2012	Severe Malaria	11	M	SURVIVOR	-	276	-	1.4	4.2	78.1	25.9	33.2	3.55	3.31	101	45	46	8.8	-	-
192	NP13005	DAKAR	2013	Severe Malaria	44	M	SURVIVOR	6	0	-	15.9	-	-	-	-	-	-	-	-	-	-	-	-
193	NP13006	DAKAR	2013	Severe Malaria	34	F	exclu	7	0	-	10.5	-	85.4	-	-	9.84	-	76	-	-	-	-	-
194	NP13007	DAKAR	2013	Severe Malaria	21	F	exclu	12	0	-	6.7	32	88.2	-	-	4.93	-	-	-	-	-	-	-
195	NP13008	DAKAR	2013	Severe Malaria	30	M	SURVIVOR	7	0	-	10.6	-	82.8	-	-	7.75	-	69	-	-	-	-	-
196	NP13009	DAKAR	2013	Severe Malaria	30	M	-	-	-	-	-	-	87.1	-	-	10.82	-	59	-	-	-	-	-
197	NP13010	DAKAR	2013	Severe Malaria	22	M	DEATH	15	60	-	8	-	77.4	-	-	11.19	-	-	-	-	-	-	-
198	NP13011	DAKAR	2013	Severe Malaria	26	F	DEATH	3	13106	-	8.7	-	82.1	-	-	29.22	-	18	-	-	-	-	-
199	NP13013	DAKAR	2013	Severe Malaria	22	M	SURVIVOR	16	0	-	12.6	-	86.6	-	-	12.98	-	283	-	-	-	-	-
200	NP13015	DAKAR	2013	Severe Malaria	25	F	SURVIVOR	12	200	-	8.3	-	83.9	-	-	9.89	-	-	-	-	-	-	-
201	NP13016	DAKAR	2013	Severe Malaria	21	F	SURVIVOR	18	482	-	9.1	25.2	81.8	-	-	18.48	-	40	-	-	-	-	-
202	NP13018	DAKAR	2013	Severe Malaria	71	M	SURVIVOR	6	40	-	10.5	-	79.6	-	-	4.79	-	91	-	-	-	-	-
203	NP13019	DAKAR	2013	Severe Malaria	61	M	SURVIVOR	6	90	-	10.5	-	82.6	-	-	9.61	-	120	-	-	-	-	-
204	NP13020	DAKAR	2013	Severe Malaria	30	F	DEATH	3	10181	-	-	-	-	-	-	-	-	-	-	-	-	-	-
205	NP13021	DAKAR	2013	Severe Malaria	79	F	SURVIVOR	5	71	-	11.3	-	81.2	-	-	5.66	-	60	-	-	-	-	-
206	NP13022	DAKAR	2013	Severe Malaria	15	M	DEATH	4	330	-	9.7	-	84.8	-	-	4.92	-	30	-	-	-	-	-
207	NP13024	DAKAR	2013	Severe Malaria	31	M	SURVIVOR	5	-	-	8.5	33.5	82.1	-	-	-	-	-	-	-	-	-	-
208	NP14001	DAKAR	2014	Severe Malaria	32	M	SURVIVOR	12	4502	-	5.5	16.7	93.3	-	-	11.02	1.79	80	6.76	3.03	-	0	0.09
209	NP14002	DAKAR	2014	Severe Malaria	56	M	SURVIVOR	7	560	-	9.9	28.6	84	-	-	12.78	3.46	20	-	-	-	-	-
210	NP14003	DAKAR	2014	Severe Malaria	59	F	SURVIVOR	17	10000	-	8.3	25.8	80.6	-	-	7.53	3.2	115	5.85	1.45	-	0	0.02
211	NP14004	DAKAR	2014	Severe Malaria	20	M	SURVIVOR	12	-	O+	9.7	28.4	81	-	-	11.28	3.51	28	9.99	0	-	0.79	0.44
212	NP14005	DAKAR	2014	Severe Malaria	17	F	SURVIVOR	39	-	-	9	28.4	79	25	32	23.51	3.62	259	22.26	1	0.12	0.09	0.02
213	NP14006	DAKAR	2014	Severe Malaria	20	F	SURVIVOR	9	-	-	9.9	28.8	92.6	-	-	12.01	3.11	166	9.35	1.1	-	0	0.01
214	NP14007	DAKAR	2014	Severe Malaria	21	M	SURVIVOR	7	-	-	10.7	30.9	80.5	-	-	18.5	3.84	76	14.23	2.16	-	0.07	0.05
215	NP14009	DAKAR	2014	Severe Malaria	66	M	DEATH	1	0	-	-	38.5	83.7	-	-	16.37	4.6	29	13.35	1.22	-	0.01	0.13
216	NP14010	DAKAR	2014	Severe Malaria	17	M	SURVIVOR	5	-	-	10	37.7	80.7	-	-	7.74	3.93	285	3.99	2.76	-	0.09	0.08
217	NP14011	DAKAR	2014	Severe Malaria	25	M	SURVIVOR	9	-	-	8.7	26.8	82.7	-	-	5.66	3.24	471	2.6	2.75	-	0.02	0.02
218	NP14013	DAKAR	2014	Severe Malaria	41	M	SURVIVOR	11	-	-	11.7	3.4	90.7	-	-	19.09	3.75	67	16.39	0.82	-	0	0.01
219	TA14009	TAMABACOUNDA	2014	Severe Malaria	12	M	SURVIVOR	0	218	-	4.8	14.7	90.3	29.4	32.6	8.19	1.68	101	-	-	-	-	-
220	TA14015	TAMABACOUNDA	2014	Severe Malaria	0	M	SURVIVOR	-	27	-	9.6	28.3	87.3	29.6	33.9	15.28	3.24	85	-	-	-	-	-
221	TA14014	TAMABACOUNDA	2014	Severe Malaria	50	F	SURVIVOR	-	457	-	8.7	26	84.1	28.2	33.5	4.25	3.09	162	-	-	-	-	-
222	TA14016	TAMABACOUNDA	2014	Severe Malaria	5	F	SURVIVOR	-	360	-	7.9	24.3	75.5	24.5	32.5	4.84	3.22	69	-	-	-	-	-
223	TA14018	TAMABACOUNDA	2014	Severe Malaria	-	M	SURVIVOR	-	1047	-	9.6	30.1	75	23.9	31.9	4.84	4.01	201	-	-	-	-	-
224	TA14034	TAMABACOUNDA	2014	Severe Malaria	3	F	SURVIVOR	-	0	O+	3.3	10.1	82.3	26.8	32.6	18.62	1.23	230	88.2	8.5	2.7	0.4	0.2
225	TA14039	TAMABACOUNDA	2014	Severe Malaria	2	M	SURVIVOR	-	549	O+	6.4	20.8	8.1	24.9	30.7	7.99	2.57	287	36.2	47.1	14.6	0.6	1.4
226	TA14042	TAMABACOUNDA	2014	Severe Malaria	13	F	SURVIVOR	-	36	O+	3.5	11.4	86.5	26.5	30.7	19.64	1.32	297	87.4	9.3	2.6	0.4	0.3
227	TA14044	TAMABACOUNDA	2014	Severe Malaria	9	F	SURVIVOR	-	6365	B+	4	11.8	70	23.8	34	15.58	1.68	219	47.3	44	6.3	0.3	2.1
228	TA14045	TAMABACOUNDA	2014	Severe Malaria	4	F	SURVIVOR	-	80	B+	4	12.5	75.1	24.1	32.1	9.77	1.66	115	29.7	63.3	4.5	1.7	0.8
229	TA14053	TAMABACOUNDA	2014	Severe Malaria	15	M	SURVIVOR	-	197	B+	6.3	17.5	70.2	25.3	36	6.4	2.49	76	91.9	5.4	2	0.5	0.2
230	TA14056	TAMABACOUNDA	2014	Severe Malaria	2	M	SURVIVOR	-	2480	B+	5.3	16.3	60.9	19.9	32.6	9.91	2.67	114	31.7	54.9	10.6	1.2	1.6
231	TA14057	TAMABACOUNDA	2014	Severe Malaria	14	F	SURVIVOR	-	28205	O+	7.5	24	66.1	20.7	31.3	5.55	3.63	79	50.7	30.8	17.4	0.3	0.8
232	TA14059	TAMABACOUNDA	2014	Severe Malaria	6	M	SURVIVOR	-	63714	A+	6	18.9	79.9	25.4	31.8	5.88	2.36	41	72.3	23.9	2.2	1.3	0.1
233	TA14061	TAMABACOUNDA	2014	Severe Malaria	15	M	SURVIVOR	-	971	A+	7.4	22.8	56.1	18.2	32.5	7.44	4.06	52	66.6	24	8.3	0.4	0.7
234	TA14069	TAMABACOUNDA	2014	Severe Malaria	35	-	SURVIVOR	-	160	-	10.8	33.3	-	-	-	12.67	4.4	110	-	-	-	-	-
235	TA14070	TAMABACOUNDA	2014	Severe Malaria	3	F	SURVIVOR	-	70	B+	9.49	28.9	-	-	-	9.49	3.36	116	-	-	-	-	-
236	TA14071	TAMABACOUNDA	2014	Severe Malaria	7	M	SURVIVOR	-	48	O-	2.7	7	-	-	-	22.75	0.86	161	-	-	-	-	-
237	TA14074	TAMABACOUNDA	2014	Severe Malaria	4	F	SURVIVOR	-	-	O+	5.4	15.9				24.4	1.81	144	-	-	-	-	-
238	TA14075	TAMABACOUNDA	2014	Severe Malaria	4	M	SURVIVOR	-	-	A+	4.1	-	-	-	-	12.63	1.4	106	-	-	-	-	-
239	TA14078	TAMABACOUNDA	2014	Severe Malaria	3	F	SURVIVOR	-	-	AB+	5	17.4				9	2.76	222	-	-	-	-	-
240	TA14085	TAMABACOUNDA	2014	Severe Malaria	40	M	SURVIVOR	0	-	O+	2.7						0.88	98
241	TA14088	TAMABACOUNDA	2014	Severe Malaria	2	M	SURVIVOR	-	41655	O+	5.4	15.2	-	-	-	18.19	2.11	97	-	-	-	-	-
242	TA14092	TAMABACOUNDA	2014	Severe Malaria	6	F	SURVIVOR	-	-	O+	3.8	-	-	-	-	30.5	1.3	164	-	-	-	-	-
243	TA14094	TAMABACOUNDA	2014	Severe Malaria	7	F	SURVIVOR	-	120	B+	8.9	25.3	-	-	-	6.75	3.3	125	-	-	-	-	-
244	TA14095	TAMABACOUNDA	2014	Severe Malaria	2	-	SURVIVOR	-	121	O+	7.6	22.6	-	-	-	9.3	2.57	98	-	-	-	-	-
245	TA14099	TAMABACOUNDA	2014	Severe Malaria	26	-	SURVIVOR	-	40	O+	9.3	27.3	-	-	-	6.29	2.97	62	-	-	-	-	-
246	TA14105	TAMABACOUNDA	2014	Severe Malaria	3	M	SURVIVOR	-	-	B+	7.5	-	-	-	-	8.8	2.54	205	-	-	-	-	-
247	TA14106	TAMABACOUNDA	2014	Severe Malaria	14	F	SURVIVOR	-	184	A+	7.1	22.1	-	-	-	21.02	2.95	303	-	-	-	-	-
248	TA14111	TAMABACOUNDA	2014	Severe Malaria	3	M	SURVIVOR	-	30	AB+	6.3	19.8	-	-	-	15.8	3.46	699	-	-	-	-	-
249	TA14115	TAMABACOUNDA	2014	Severe Malaria	0	M	SURVIVOR	-	1080	O+	14.8	44	-	-	-	7.61	5.3	64	-	-	-	-	-
250	TA14114	TAMABACOUNDA	2014	Severe Malaria	62	M	SURVIVOR	-	-	-	-	-	-	-	-	-	-	-	-	-	-	-	-
251	TA14121	TAMABACOUNDA	2014	Severe Malaria	-	-	SURVIVOR	-	-	-	-	-	-	-	-	-	-	-	-	-	-	-	-
252	TA14122	TAMABACOUNDA	2014	Severe Malaria	14	F	SURVIVOR	-	-	-	-	-	-	-	-	-	-	-	-	-	-	-	-
253	LG14001	LOUGA	2014	Severe Malaria	7	M	SURVIVOR	-	30000	-	12.4	34.9	79	28.1	35.7	12	4.43	45	-	-	-	-	-
254	LG14002	LOUGA	2014	Severe Malaria	9	M	SURVIVOR	-	32000	-	2.6	7.4	72	-	-	13.9	1.03	95	-	-	-	-	-
255	LG14003	LOUGA	2014	Severe Malaria	10	M	SURVIVOR	-	38000	-	5.8	16	73	26.2	36	6.9	2.19	39	-	-	-	-	-
256	LG14004	LOUGA	2014	Severe Malaria	6	M	SURVIVOR	-	32000	-	5.6	16.6	67	22.8	22.8	6.1	2.47	89	-	-	-	-	-
257	LG14006	LOUGA	2014	Severe Malaria	7	F	SURVIVOR	-	3320	-	7.9	25.1	80.6	25.3	31.4	8.3	3.12	229	-	-	-	-	-
258	LG14007	LOUGA	2014	Severe Malaria	51	F	SURVIVOR	-	33000	-	13.9	45.3	90.5	27.7	30.6	4.3	5.01	288	-	-	-	-	-
259	LG14010	LOUGA	2014	Severe Malaria	36	M	SURVIVOR	-	24000	-	15	51.6	83.7	24.3	29	7.2	6.17	204	-	-	-	-	-
260	LG14012	LOUGA	2014	Severe Malaria	27	M	SURVIVOR	-	51000	-	14.3	42.9	79.6	26.5	33.3	8.7	5.39	45	-	-	-	-	-
261	LG14013	LOUGA	2014	Severe Malaria	13	M	SURVIVOR	-	44800	-	8.2	23.5	83	29.2	35.1	10.1	2.82	59	-	-	-	-	-
262	DA14002	DIAMNIADIO	2014	-	8	M	-	-	19500	-	10.3	-	-	-	-	11.16	4.1	53		1.45	-	0.01	0.02
263	DA14006	DIAMNIADIO	2014	Severe Malaria	-	M	-	-	18400	-	4.8	-	-	-	-	48.09	2.13	87		-	-	0.16	0.11
264	DA14010	DIAMNIADIO	2014	-	7	M	-	-	6240	-	8.8	-	-	-	-	10.99	3.59	86		2.39	0.32	0.06	0.03
265	DA14017	DIAMNIADIO	2014	Severe Malaria	3	M	-	-	2520	-	14	-	-	-	-	90.1	5.85	191		3.17	2.08	0.06	0.02
266	DA14024	DIAMNIADIO	2014	Severe Malaria	10	M	-	-	2080	-	4.7	-	-	-	-	16.77	1.66	622		5.43	2.7	0.06	0.06
267	DA14027	DIAMNIADIO	2014	-	6	F	-	-	800	-	12.8	-	-	-	-	5.18	4.8	255			0.77	0.03	0.01
268	DA14036	DIAMNIADIO	2014	-	12	M	-	-	78240	-	11.8	-	-	-	-	3.7	4.19	30			0.11	0.01	0.01
269	DA14039	DIAMNIADIO	2014	-	1.5	F	-	-	24080	-	4.9	-	-	-	-	19.45	2.24	76			-	0.01	0.03
270	NP15001	DAKAR	2015	Severe Malaria	45	F	-	-	-	-	8.4	26.4	-	-	-	15.28	3.75	113	-	-	-	-	-
271	NP15002	DAKAR	2015	Severe Malaria	34	F	-	-	-	-	5.4	16.7	-	-	-	15.35	1.91	87	-	-	-	-	-
272	NP15003	DAKAR	2015	Severe Malaria	42	M	-	-	-	-	11.5	34.2	-	-	-	16.15	3.86	27	-	-	-	-	-
273	NP15004	DAKAR	2015	Severe Malaria		M	-	-	-	-	16.1	47.1	-	-	-	4.13	5.5	19	-	-	-	-	-
274	NP15005	DAKAR	2015	Severe Malaria	33	M	-	-	-	-	8.4	26	-	-	-	17.85	9.07	86	-	-	-	-	-
275	NP15006	DAKAR	2015	Severe Malaria	9	F	-	-	-	-	11		-	-	-			78	-	-	-	-	-
276	NP15007	DAKAR	2015	Severe Malaria	17	M	-	-	-	-	11.9	34.1	-	-	-	13.48	4.58	19	-	-	-	-	-
277	NP15008	DAKAR	2015	Severe Malaria	28	M	-	-	-	-	10	28.2	-	-	-	13.7	4	22	-	-	-	-	-
278	NP15009	DAKAR	2015	Severe Malaria	23	M	-	-	-	-	11	30.6	-	-	-	8.6	3.86	30	-	-	-	-	-
279	NP15010	DAKAR	2015	Severe Malaria	56	F	-	-	-	-	4.7	13	-	-	-	21.8	2.16	20	-	-	-	-	-
280	NP15011	DAKAR	2015	Severe Malaria	65	F	-	-	-	-	9.8	29.9	-	-	-	18.44	3.61	217	-	-	-	-	-
281	NP15012	DAKAR	2015	Severe Malaria	41	M	-	-	-	-	8	26.5	-	-	-	12.69	2.89	768	-	-	-	-	-
282	NP15013	DAKAR	2015	Severe Malaria	72	M	-	-	-	-	8	21.7	-	-	-	19.44	2.78	70	-	-	-	-	-
283	NP15014	DAKAR	2015	Severe Malaria	23	M	-	-	-	-	15.1	43	-	-	-	14.13	8.44	37	-	-	-	-	-
284	NP15015	DAKAR	2015	Severe Malaria	20	F	-	-	-	-	9.8	30.7	-	-	-	6.65	3.67	30	-	-	-	-	-
285	NP15016	DAKAR	2015	Severe Malaria	-	-	-	-	-	-	-	-	-	-	-	-	-	-	-	-	-	-	-
286	NP15017	DAKAR	2015	Severe Malaria	87	F	-	-	-	-	9.5	-	-	-	-	15.72	-	30	-	-	-	-	-
287	TA15001	TAMABACOUNDA	2015	Severe Malaria	10	M	-	-	180	-	7	20.2	-	-	-	11.83	2.83	63	-	-	-	-	-
288	TA15003	TAMABACOUNDA	2015	Severe Malaria	1.25	M	-	-	3162	-	5.4	17.9	-	-	-	0.91	2.81	68	-	-	-	-	-
289	TA15004	TAMABACOUNDA	2015	Severe Malaria	7	M	-	-	7310	-	5.1	15.2	-	-	-	14.1	1.94	111	-	-	-	-	-
290	TA15006	TAMABACOUNDA	2015	Severe Malaria	2.5	M	-	-	118	-	3.4	9	-	-	-	19.3	1.15	60	-	-	-	-	-
291	TA15007	TAMABACOUNDA	2015	Severe Malaria	9	M	-	-	-	-	10.6	31	-	-	-	7.7	4.11	122	-	-	-	-	-
292	TA15009	TAMABACOUNDA	2015	Severe Malaria	43	F	-	-	-	-	9.3	27.8	-	-	-	4.05	13.39	50	-	-	-	-	-
293	TA15011	TAMABACOUNDA	2015	Severe Malaria	7	M	-	-	2600	-	6.7	27.4	-	-	-	-	2.53	96	-	-	-	-	-
294	TA15012	TAMABACOUNDA	2015	Severe Malaria	2	M	-	-	32500	-	8.5	16.9	-	-	-	16.5	3.76	467	-	-	-	-	-
295	TA15013	TAMABACOUNDA	2015	Severe Malaria	3	M	-	-	-	-	4.9	16.9				7.7	1.77	252	-	-	-	-	-
296	TA15016	TAMABACOUNDA	2015	Severe Malaria	3.16	M	-	-	597	-	6.6	18.3	-	-	-	13.1	2.74	148	-	-	-	-	-
297	TA15017	TAMABACOUNDA	2015	Severe Malaria	7	F	-	-	13100	-	7.2	18.4	-	-	-	10.8	2.42	119	-	-	-	-	-
298	TA15019	TAMABACOUNDA	2015	Severe Malaria	40	F	-	-	3000	-	12.1	41.6	-	-	-	5.9	4.16	105	-	-	-	-	-
299	TA15020	TAMABACOUNDA	2015	Severe Malaria	0.4	F	-	-	1275	-	9.3	27.5	-	-	-	5.3	4.04	132	-	-	-	-	-
300	TA15023	TAMABACOUNDA	2015	Severe Malaria	8	F	-	-	4631	-	9.6	28.5	-	-	-	8	3.68	24	-	-	-	-	-
301	TA15024	TAMABACOUNDA	2015	Severe Malaria	14	M	-	-	-	-	6.9	20	-	-	-	9.3	2.88	125	-	-	-	-	-
302	TA15025	TAMABACOUNDA	2015	Severe Malaria	2	F	-	-	-	-	2.7	7.3	-	-	-	7.2	1.02	216	-	-	-	-	-
303	TA15026	TAMABACOUNDA	2015	Severe Malaria	8	M	-	-	380	-	7.7	25.3	-	-	-	2.92	4.74	280	-	-	-	-	-
304	TA15027	TAMABACOUNDA	2015	Severe Malaria	2	F	-	-	4937	-	6.2	19.5	-	-	-	2.14	7.94	43	-	-	-	-	-
305	TA15031	TAMABACOUNDA	2015	Severe Malaria	-	M	-	-	-	-	-	-	-	-	-	-	-	-	-	-	-	-	-
306	TA15034	TAMABACOUNDA	2015	Severe Malaria	11	M	-	-	960	-	2.5	7.4	-	-	-	4.7	0.79	0.79	-	-	-	-	-
307	TA15035	TAMABACOUNDA	2015	Severe Malaria	8	F	-	-	-	-	4.6	14.3	-	-	-	12.2	2.47	2.47	-	-	-	-	-
308	TA15038	TAMABACOUNDA	2015	Severe Malaria	5	M	-	-	487	-	10.7	31.8	-	-	-	7	4.35	4.35	-	-	-	-	-
309	TA15040	TAMABACOUNDA	2015	Severe Malaria	4	M	-	-	7379	-	3.6	10	-	-	-	11.9	1.37	1.37	-	-	-	-	-
310	TA15041	TAMABACOUNDA	2015	Severe Malaria	1	F	-	-	110	-	1.8	5.2	-	-	-	11.7	0.65	0.65	-	-	-	-	-
311	TA15042	TAMABACOUNDA	2015	Severe Malaria	35	M	-	-	-	-	10.8	29.5	-	-	-	11.4	3.27	3.27	-	-	-	-	-
312	TA15044	TAMABACOUNDA	2015	Severe Malaria	2	M	-	-	-	-	5.5	16	-	-	-	6.4	2.19	2.19	-	-	-	-	-
313	TA15045	TAMABACOUNDA	2015	Severe Malaria	12	M	-	-	294	-	10.5	32	-	-	-	6	3.81	3.81	-	-	-	-	-
314	TA15046	TAMABACOUNDA	2015	Severe Malaria	1.5	F	-	-	-	-	17	50.1	-	-	-	3.8	5.54	5.54	-	-	-	-	-
315	TA15048	TAMABACOUNDA	2015	Severe Malaria	1	F	-	-	110	-	12	36	-	-	-	7.7	4	4	-	-	-	-	-
316	TA15051	TAMABACOUNDA	2015	Severe Malaria	35	F	-	-	-	-	99	30	-	-	-	5.1	3.62	3.62	-	-	-	-	-
317	TA15052	TAMABACOUNDA	2015	Severe Malaria	4	M	-	-	-	-	8.6	25.9	-	-	-	17.9	3.37	3.37	-	-	-	-	-
318	TA15053	TAMABACOUNDA	2015	Severe Malaria	4	F	-	-	-	-	10	30	-	-	-	5.2	4.1	4.1	-	-	-	-	-
319	TA15054	TAMABACOUNDA	2015	Severe Malaria	4	F	-	-	-	-	8.7	27.4	-	-	-	7.3	3.4	3.4	-	-	-	-	-
320	TA15055	TAMABACOUNDA	2015	Severe Malaria	9	F	-	-	-	-	10.6	31.1	-	-	-	8.2	3.94	3.94	-	-	-	-	-
321	TA15056	TAMABACOUNDA	2015	Severe Malaria	10	F	-	-	-	-	7.4	20.5	-	-	-	8.5	2.46	2.46	-	-	-	-	-
322	TA15059	TAMABACOUNDA	2015	Severe Malaria	4	M	-	-	-	-	-	-	-	-	-	-	-	-	-	-	-	-	-
323	TA15060	TAMABACOUNDA	2015	Severe Malaria	1.75	F	-	-	-	-	4.5	12.3	-	-	-	61.9	1.7	1.7	-	-	-	-	-
324	TA15062	TAMABACOUNDA	2015	Severe Malaria	17	M	-	-	73800	-	10.4	30.3	-	-	-	6.4	3.55	3.55	-	-	-	-	-
325	TA15063	TAMABACOUNDA	2015	Severe Malaria	10	F	-	-	46100	-	11.8	34.4	-	-	-	11	4.07	4.07	-	-	-	-	-
326	TA15066	TAMABACOUNDA	2015	Severe Malaria	13	M	-	-	219	-	11.7	34.4	-	-	-	8.3	4.21	4.21	-	-	-	-	-
327	TA15069	TAMABACOUNDA	2015	Severe Malaria	2	M	-	-	1253	-	14.9	46.5	-	-	-	5	6.68	6.68	-	-	-	-	-
328	TA15072	TAMABACOUNDA	2015	Severe Malaria	1	M	-	-	2200	-	8	22.6	-	-	-	3.8	3	3	-	-	-	-	-
329	TA15073	TAMABACOUNDA	2015	Severe Malaria	7	M	-	-	-	-	6.5	19.4	-	-	-	16	2.21	2.21	-	-	-	-	-
330	TA15074	TAMABACOUNDA	2015	Severe Malaria	8	M	-	-	-	-	20.4	64.9	-	-	-	8.6	7.9	7.9	-	-	-	-	-
331	TA15075	TAMABACOUNDA	2015	Severe Malaria	6	F	-	-	-	-	8.2	23.2	-	-	-	13.8	2.91	2.91	-	-	-	-	-
332	KO15001	KOLDA	2015	Severe Malaria	-	F	SURVIVOR	-	980	-	10.4	31.6	84.7	27.9	32.9	5.6	3.73	143	80.6	12.2	-	-	-
333	KO15003	KOLDA	2015	Severe Malaria	3	M	SURVIVOR	-	5052	-	8.1	24.3	72.5	24.2	33.3	19.8	3.35	96	47.6	38.8	-	-	-
334	KO15004	KOLDA	2015	Severe Malaria	2	M	DEATH	-	15300	-	5.4	16.6	89.2	29	32.5	26.2	1.86	112	37.7	47.1	-	-	-
335	KO15005	KOLDA	2015	Severe Malaria	15	M	SURVIVOR	-	33194	-	4.7	14.1	70.9	23.6	33.3	17.5	1.99	22	69.6	23.9	-	-	-
336	KO15006	KOLDA	2015	Severe Malaria	65	F	SURVIVOR	-	8190	-	12.4	36.2	86	29.5	34.3	5.8	4.21	184	83.9	9.6	-	-	-
337	KO15007	KOLDA	2015	Severe Malaria	18	F	SURVIVOR	-	15018	-	14.2	42.1	79.6	26.8	33.7	4.9	5.29	60	52.6	34.6	-	-	-
338	KO15008	KOLDA	2015	Severe Malaria	24	F	SURVIVOR	-	16551	-	13.7	40.2	82.2	28	34.1	4	4.89	60	79.8	17	-	-	-
339	KO15009	KOLDA	2015	Severe Malaria	3	F	SURVIVOR	-	30188	-	4.9	16.4	76.3	22.8	29.9	27.9	2.15	77	53.9	32.8	-	-	-
340	KO15010	KOLDA	2015	Severe Malaria	41	F	SURVIVOR	-	10140	-	9.7	30.2	77	24.7	32.1	4.7	3.92	60	85.4	9.7	-	-	-
341	KO15011	KOLDA	2015	Severe Malaria	3	F	SURVIVOR	-	1294	-	10.9	32.1	74.8	25.4	34	11.4	4.29	68	44.7	46	-	-	-
342	KO15012	KOLDA	2015	Severe Malaria	5	M	SURVIVOR	-	2880	-	10.1	29.2	84.9	29.4	34.6	8	3.44	77	59.7	21.7	-	-	-
343	KO15013	KOLDA	2015	Severe Malaria	2	M	SURVIVOR	-	17241	-	3.7	11.2	72.7	24	33	10.3	1.54	15	46.8	46	-	-	-
344	KO15014	KOLDA	2015	Severe Malaria	5	M	SURVIVOR	-	4000	-	9.1	26.5	75.1	25.8	34.3	7.1	3.53	48	33.8	38.3	-	-	-
345	KO15015	KOLDA	2015	Severe Malaria	30	F	SURVIVOR	-	15818	-	7	20.2	86	29.8	34.7	33	2.35	245	85.1	12	-	-	-
346	KO15016	KOLDA	2015	Severe Malaria	66	M	SURVIVOR	-	6885	-	13.3	38.8	84.7	29	34.3	2.3	4.58	5	36.3	29.6	-	-	-
347	KO15017	KOLDA	2015	Severe Malaria	3	F	SURVIVOR	-	15567	-	11	32.2	81.5	27.8	34.2	17.7	3.95	38	83	14.1	-	-	-
348	KO15018	KOLDA	2015	Severe Malaria	18	F	SURVIVOR	-	3288	-	14.3	41.7	83.7	28.7	34.3	14.5	4.98	156	87.5	7.5	-	-	-
349	KO15019	KOLDA	2015	Severe Malaria	30	F	SURVIVOR	-	8225	-	12.6	36.9	83.3	28.4	34.1	6.3	4.43	113	74.7	16	-	-	-
350	KO15022	KOLDA	2015	Severe Malaria	5	M	SURVIVOR	-	30750	-	12.5	37.2	80.5	27.1	33.6	10.3	4.62	90	73.2	16.3	-	-	-
351	KO15023	KOLDA	2015	Severe Malaria	51	M	SURVIVOR	-	6500	-	10.1	29	78	27.2	34.8	4.5	3.72	20	71.5	21.3	-	-	-
352	KO15024	KOLDA	2015	Severe Malaria	3	M	SURVIVOR	-	20160	-	10.5					8.7	4.05	131	-	11.2	-	-	-
353	KO15025	KOLDA	2015	Severe Malaria	1.2	M	SURVIVOR	-	30250	-	11.2					10.5	4.72	180	-	27.9	-	-	-
354	KO15027	KOLDA	2015	Severe Malaria	56	F	SURVIVOR	-	15750	-	12.5	37.2	82.7	27.8	33.6	6.8	4.5	135	86.4	8.7	-	-	-
355	KO15028	KOLDA	2015	Severe Malaria	49	M	SURVIVOR	-	458	-	11.7	35	78	26.1	33.4	5.4	4.4	68	63.5	32.5	-	-	-
356	KO15029	KOLDA	2015	Severe Malaria	0.9	M	SURVIVOR	-	11080	-	12	34.8	89.9	31	34.5	11.3	3.87	222	77.4	14.9	-	-	-
357	KO15030	KOLDA	2015	Severe Malaria	2	F	SURVIVOR	-	69189	-	10.4	33.2	84.3	26.4	31.3	12	3.94	264	70.4	26.4	-	-	-
358	KO15031	KOLDA	2015	Severe Malaria	63	F	SURVIVOR	-	3222	-	11	31.3	86.2	30.3	35.1	5.1	3.63	164	62	29.6	-	-	-
359	KO15034	KOLDA	2015	Severe Malaria	66	M	SURVIVOR	-	16750	-	12.2	35.7	83.8	28.6	34.2	3.2	4.26	52	65.3	16.8	-	-	-
360	KO15035	KOLDA	2015	Severe Malaria	3	F	SURVIVOR	-	30790	-	7.1	23.9	67.9	20.2	29.7	5.7	3.52	126	26.8	34	-	-	-
361	KO15036	KOLDA	2015	Severe Malaria	30	F	SURVIVOR	-	4384	-	14.9	41.8	84.3	30	35.6	4.5	4.96	109	73.3	17.4	-	-	-
362	KO15037	KOLDA	2015	Severe Malaria	40	M	SURVIVOR	-	30950	-	15.1	45	91.8	30.8	33.6	5	4.9	21	67.4	19.8	-	-	-
363	KO15038	KOLDA	2015	Severe Malaria	18	M	SURVIVOR	-	20650	-	14.1	41.3	81	27.6	34.1	6.7	5.1	28	81.5	15.3	-	-	-
364	KO15039	KOLDA	2015	Severe Malaria	16	M	SURVIVOR	-	22540	-	14.3	44.1	82.1	26.6	32.4	6.1	5.37	19	78.2	18.2	-	-	-
365	KO15040	KOLDA	2015	Severe Malaria	4	F	SURVIVOR	-	25270	-	12.9	40.7	90.4	28.7	31.7	12.2	4.5	281	86.7	8.7	-	-	-
366	KO15041	KOLDA	2015	Severe Malaria	17	F	SURVIVOR	-	10300	-	8.9	25.1	86.3	30.6	35.5	8.7	2.91	45	75.7	21.1	-	-	-
367	KO15042	KOLDA	2015	Severe Malaria	30	F	SURVIVOR	-	46616	-	6.4	17.7	85.5	30.9	36.2	12.4	2.07	26	80	15.1	-	-	-
368	KO15044	KOLDA	2015	Severe Malaria	45	M	SURVIVOR	-	14400	-	13.7	39.9	91.3	31.4	34.3	6.7	4.37	34	65.5	17.6	-	-	-
369	KO15046	KOLDA	2015	Severe Malaria	16	F	SURVIVOR	-	942	-	10.4	29.5	84	29.6	35.3	24.8	3.51	69	69.7	0	-	-	-
370	KO15047	KOLDA	2015	Severe Malaria	17	F	SURVIVOR	-	6333	-	11.9	37.1	79.8	25.6	32.1	5	4.65	107	73	14.6	-	-	-
371	KO15048	KOLDA	2015	Severe Malaria	28	M	SURVIVOR	-	33000	-	15.4	45.7	87.4	29.4	33.7	6.5	5.23	85	77.9	16.7	-	-	-
372	KO15050	KOLDA	2015	Severe Malaria	6	M	SURVIVOR	-	9000	-	7.2	7.2	21.4	74.8	25.2	10.8	2.86	44	76	19.9	-	-	-
373	KO15051	KOLDA	2015	Severe Malaria	6	M	SURVIVOR	-	7300	-	9.9	9.9	30.1	82	27	9	3.67	267	53	24.8	-	-	-
374	KO15052	KOLDA	2015	Severe Malaria	25	M	SURVIVOR	-	20800	-	9.4	9.4	26.9	83	29	10.8	3.24	28	83.1	13.3	-	-	-
375	KO15053	KOLDA	2015	Severe Malaria	7	M	SURVIVOR	-	872	-	9.5	9.5	29.6	72.9	23.4	11.4	4.06	69	57.1	34.2	-	-	-
376	KO15054	KOLDA	2015	Severe Malaria	5	M	SURVIVOR	-	20870	-	11	11	34.7	95.9	30.4	13.8	3.62	87	31.4	38.5	-	-	-
377	KO15055	KOLDA	2015	Severe Malaria	26	F	SURVIVOR	-	57660	-	9.8	9.8	28.5	70.5	24.3	5.8	4.04	90	80.4	12.6	-	-	-
378	KO15056	KOLDA	2015	Severe Malaria	32	M	SURVIVOR	-	12553	-	12.9	12.9	38.6	87.5	29.3	5.4	4.41	44	74.8	18.8	-	-	-
379	KO15057	KOLDA	2015	Severe Malaria	4	F	SURVIVOR	-	5618	-	13.2	13.2	39.7	78.9	26.2	13.9	5.03	111	75.7	17.5	-	-	-
380	KO15058	KOLDA	2015	Severe Malaria	6	F	SURVIVOR	-	5012	-	8.8	8.8	27.1	82.6	26.8	7	3.28	100	38.2	31	-	-	-
381	KO15060	KOLDA	2015	Severe Malaria	10	M	SURVIVOR	-	16350	-	12.9	37.8	77.5	26.4	34.1	13.5	4.88	66	75.3	17.4	-	-	-
382	KO15061	KOLDA	2015	Severe Malaria	57	F	SURVIVOR	-	3660	-	10.8	32.1	82.7	27.8	33.6	4.6	3.88	14	70.7	25.8	-	-	-
383	KO15062	KOLDA	2015	Severe Malaria	21	F	SURVIVOR	-	30970	-	12	36.5	89	29.3	32.9	10.5	4.1	43	69.5	24.2	-	-	-
384	KO15063	KOLDA	2015	Severe Malaria	60	F	SURVIVOR	-	30580	-	10.2	32.2	83.6	26.5	31.7	13.1	3.85	22	57.6	37	-	-	-
385	KO15064	KOLDA	2015	Severe Malaria	2.5	F	SURVIVOR	-	40000	-	7.3	22	73.1	24.3	33.2	14	3.01	64	29.5	42.8	-	-	-
386	KO15065	KOLDA	2015	Severe Malaria	2	M	SURVIVOR	-	14285	-	10.4	31.6	84.5	27.8	32.9	13.8	3.74	116	42.7	35.9	-	-	-
387	KO15066	KOLDA	2015	Severe Malaria	3	M	SURVIVOR	-	7250	-	3.2	10	86.2	27.6	32	37.4	1.16	193	40	53.7	-	-	-
388	KO15067	KOLDA	2015	Severe Malaria	5	F	SURVIVOR	-	13332	-	9.1	27.2	74.9	25.1	33.5	9.6	3.63	105	67.1	24.3	-	-	-
389	KO15068	KOLDA	2015	Severe Malaria	3	F	SURVIVOR	-	50000	-	3.9	11.4	79.2	27.1	34.2	18.6	1.44	60	32.9	60.5	-	-	-
390	KO15069	KOLDA	2015	Severe Malaria	18	F	SURVIVOR	-	7384	-	7.9	24.3	73	23.7	32.5	8.2	3.33	51	62.8	31.1	-	-	-
391	KO15080	KOLDA	2015	Severe Malaria	7	M	SURVIVOR	-	84666	-	6.3	22.4	87.6	24.6	28.1	13.4	2.56	164	55	30	-	-	-
392	KO15084	KOLDA	2015	Severe Malaria	20	F	SURVIVOR	-	4289	-	12.7	38.2	82.2	27.3	33.2	9.1	4.65	179	64.5	24.6	-	-	-
393	KO15085	KOLDA	2015	Severe Malaria	32	M	SURVIVOR	-	9874	-	15.6	47.2	88.7	29.3	33.1	7.1	5.32	53	75.6	13.5	-	-	-
394	KO15086	KOLDA	2015	Severe Malaria	20	M	SURVIVOR	-	14635	-	13.9	41.4	79.9	26.8	33.6	9.7	5.18	201	78	12.8	-	-	-
395	KO15087	KOLDA	2015	Severe Malaria	25	M	SURVIVOR	-	12342	-	13	38.3	84.5	28.7	33.9	7.8	4.53	338	64.3	26	-	-	-
396	KO15088	KOLDA	2015	Severe Malaria	35	F	SURVIVOR	-	4532	-	5.6	16.3	80.7	27.7	34	4.1	2.02	44	58.2	34	-	-	-
397	KO15089	KOLDA	2015	Severe Malaria	36	M	SURVIVOR	-	20000	-	14.7	42.4	91.8	31.8	34.7	8.5	4.62	120	75.7	17.6	-	-	-
398	KO15091	KOLDA	2015	Severe Malaria	85	F	DEATH	-	8760	-	12.9	37.6	92.2	31.6	34.3	3.7	4.08	70	55.3	33.1	-	-	-
399	KO15092	KOLDA	2015	Severe Malaria	8	M	SURVIVOR	-	24800	-	6.4	19	83.7	28.2	33.7	18	2.27	87	39.9	24.2	-	-	-
400	KO15093	KOLDA	2015	Severe Malaria	28	M	SURVIVOR	-	6300	-	15.4	46.5	83.6	27.7	33.1	4.5	5.56	64	68.2	19.2	-	-	-
401	KO15094	KOLDA	2015	Severe Malaria	10	M	SURVIVOR	-	50632	-	8	23.6	82.5	28	33.9	15.9	2.86	32	38.9	31.1	-	-	-
402	KO15097	KOLDA	2015	Severe Malaria	8	F	SURVIVOR	-	31440	-	7.9	22.8	75.2	26.1	34.6	10.6	3.03	10.6	71.7	22	-	-	-
403	KO15098	KOLDA	2015	Severe Malaria	7	F	SURVIVOR	-	48000	-	10.9	33.2	72.8	23.9	32.8	8.6	4.56	8.6	10.5	21.1	-	-	-
404	KO15100	KOLDA	2015	Severe Malaria	8	F	SURVIVOR	-	31440	-	7.9	22.8	75.2	26.1	34.6	10.6	3.03	10.6	71.7	22	-	-	-
405	KO15101	KOLDA	2015	Severe Malaria	7	F	SURVIVOR	-	48000	-	10.9	33.2	72.8	23.9	32.8	8.6	4.56	8.6	10.5	21.1	-	-	-
406	KO15103	KOLDA	2015	Severe Malaria	35	F	SURVIVOR	-	10780	-	13	38.3	84.4	28.6	33.9	5.6	4.54	145	81.9	11.5	-	-	-
407	KO15104	KOLDA	2015	Severe Malaria	10	F	SURVIVOR	-	6790	-	6.9	20.8	75.6	25.1	33.2	22.3	2.75	306	68.5	24.4	-	-	-
408	KO15105	KOLDA	2015	Severe Malaria	10	F	SURVIVOR	-	2041	-	6.1	18.3	86.3	28.8	33.3	21.6	2.12	315	69.9	21.6	-	-	-
409	KO15106	KOLDA	2015	Severe Malaria	15	M	SURVIVOR	-	30000	-	14.5	41.6	82.7	28.8	34.9	6.2	5.03	107	81.6	15.7	-	-	-
410	KO15107	KOLDA	2015	Severe Malaria	8	M	SURVIVOR	-	33000	-	4.8	15	76.9	24.6	32	17.5	1.95	104	52.9	40.9	-	-	-
411	KO15108	KOLDA	2015	Severe Malaria	5	M	SURVIVOR	-	28000	-	11.3	33.5	76.3	25.7	33.7	9.3	4.39	169	64.7	27.4	-	-	-
412	KO15109	KOLDA	2015	Severe Malaria	12	M	SURVIVOR	-	346	-	6.9	22.1	82.8	25.8	31.2	7.5	2.67	74	68.1	16.6	-	-	-
413	KO15110	KOLDA	2015	Severe Malaria	4	M	SURVIVOR	-	27100	-	10.5	31.4	74.9	25.1	33.4	5.3	4.19	58	51.8	40.9	-	-	-
414	KO15111	KOLDA	2015	Severe Malaria	8	F	SURVIVOR	-	49122	-	6	24.3	75.5	24.5	32.5	13.9	2.4	40	73.3	17.6	-	-	-
415	KO15113	KOLDA	2015	Severe Malaria	10	M	SURVIVOR	-	1485	-	9.6	28.3	74.7	29	33.9	12.1	3.76	56	75.8	17.1	-	-	-
416	KO15114	KOLDA	2015	Severe Malaria	66	F	SURVIVOR	-	38198	-	7.1	25.3	66.2	26.4	28.1	11.8	3.82	328	31.7	41.8	-	-	-
417	KO15115	KOLDA	2015	Severe Malaria	12	F	SURVIVOR	-	20000	-	5.4	16.4	80.4	27.4	32.9	16.1	2.04	43	70.9	21.1	-	-	-
418	KO15116	KOLDA	2015	Severe Malaria	18	M	SURVIVOR	-	1486	-	4.4	13.5	93.8	30.6	32.6	29.3	1.44	171	31.7	62.6	-	-	-
419	KO15117	KOLDA	2015	Severe Malaria	-	F	SURVIVOR	-	6117	-	2.5	7.7	96	27.9	32.5	8	0.85	63	65.9	28.9	-	-	-
420	KO15118	KOLDA	2015	Severe Malaria	16	M	SURVIVOR	-	13000	-	3.7	11.9	86.2	26	31.4	3.4	1.58	8	71.1	18.4	-	-	-
1	PS03004	DAKAR	2003	Uncomplicated Malaria	-	F	-	-	-	-	-	-	-	-	-	-	-	-	-	-	-	-	-
2	PS03009	DAKAR	2003	Uncomplicated Malaria	-	-	-	-	-	-	-	-	-	-	-	-	-	-	-	-	-	-	-
3	PS03010	DAKAR	2003	Uncomplicated Malaria	-	-	-	-	-	-	-	-	-	-	-	-	-	-	-	-	-	-	-
4	PS04001	DAKAR	2004	Uncomplicated Malaria	-	M	SURVIVOR	0	-	-	-	-	-	-	-	-	-	-	-	-	-	-	-
5	PS04002	DAKAR	2004	Uncomplicated Malaria	-	M	SURVIVOR	0	-	-	-	-	-	-	-	-	-	-	-	-	-	-	-
6	PS04003	DAKAR	2004	Uncomplicated Malaria	-	M	SURVIVOR	0	-	-	-	-	-	-	-	-	-	-	-	-	-	-	-
7	PS04004	DAKAR	2004	Uncomplicated Malaria	-	M	SURVIVOR	0	-	-	-	-	-	-	-	-	-	-	-	-	-	-	-
8	PS04005	DAKAR	2004	Uncomplicated Malaria	-	-	SURVIVOR	0	-	-	-	-	-	-	-	-	-	-	-	-	-	-	-
9	PS04006	DAKAR	2004	Uncomplicated Malaria	-	-	SURVIVOR	0	-	-	-	-	-	-	-	-	-	-	-	-	-	-	-
10	PS04007	DAKAR	2004	Uncomplicated Malaria	-	F	SURVIVOR	0	-	-	-	-	-	-	-	-	-	-	-	-	-	-	-
11	PS04008	DAKAR	2004	Uncomplicated Malaria	-	F	SURVIVOR	0	-	-	-	-	-	-	-	-	-	-	-	-	-	-	-
12	PS04009	DAKAR	2004	Uncomplicated Malaria	-	M	SURVIVOR	0	-	-	-	-	-	-	-	-	-	-	-	-	-	-	-
13	PS04010	DAKAR	2004	Uncomplicated Malaria	-	F	SURVIVOR	0	-	-	-	-	-	-	-	-	-	-	-	-	-	-	-
14	PS04011	DAKAR	2004	Uncomplicated Malaria	-	M	SURVIVOR	0	-	-	-	-	-	-	-	-	-	-	-	-	-	-	-
15	PS04012	DAKAR	2004	Uncomplicated Malaria	-	M	SURVIVOR	0	-	-	-	-	-	-	-	-	-	-	-	-	-	-	-
16	PS04013	DAKAR	2004	Uncomplicated Malaria	-	F	SURVIVOR	0	-	-	-	-	-	-	-	-	-	-	-	-	-	-	-
17	PS04014	DAKAR	2004	Uncomplicated Malaria	-	M	SURVIVOR	0	-	-	-	-	-	-	-	-	-	-	-	-	-	-	-
18	PS04015	DAKAR	2004	Uncomplicated Malaria	-	F	SURVIVOR	0	-	-	-	-	-	-	-	-	-	-	-	-	-	-	-
19	PS04016	DAKAR	2004	Uncomplicated Malaria	-	M	SURVIVOR	0	-	-	-	-	-	-	-	-	-	-	-	-	-	-	-
20	PS04017	DAKAR	2004	Uncomplicated Malaria	28	M	SURVIVOR	0	-	-	-	-	-	-	-	-	-	-	-	-	-	-	-
21	PS04018	DAKAR	2004	Uncomplicated Malaria	15	F	SURVIVOR	0	-	-	-	-	-	-	-	-	-	-	-	-	-	-	-
22	PS04019	DAKAR	2004	Uncomplicated Malaria	12	-	SURVIVOR	0	-	-	-	-	-	-	-	-	-	-	-	-	-	-	-
23	PS04020	DAKAR	2004	Uncomplicated Malaria	-	M	SURVIVOR	0	-	-	-	-	-	-	-	-	-	-	-	-	-	-	-
24	PS04025	DAKAR	2004	Uncomplicated Malaria	34	M	SURVIVOR	0	-	-	-	-	-	-	-	-	-	-	-	-	-	-	-
25	PS04026	DAKAR	2004	Uncomplicated Malaria	44	F	SURVIVOR	0	-	-	-	-	-	-	-	-	-	-	-	-	-	-	-
26	PS04027	DAKAR	2004	Uncomplicated Malaria	13	M	SURVIVOR	0	-	-	-	-	-	-	-	-	-	-	-	-	-	-	-
27	PS04028	DAKAR	2004	Uncomplicated Malaria	8	F	SURVIVOR	0	-	-	-	-	-	-	-	-	-	-	-	-	-	-	-
28	PS04029	DAKAR	2004	Uncomplicated Malaria	30	M	SURVIVOR	0	-	-	-	-	-	-	-	-	-	-	-	-	-	-	-
29	PS04030	DAKAR	2004	Uncomplicated Malaria	-	F	SURVIVOR	0	-	-	-	-	-	-	-	-	-	-	-	-	-	-	-
30	PS04031	DAKAR	2004	Uncomplicated Malaria	-	-	SURVIVOR	0	-	-	-	-	-	-	-	-	-	-	-	-	-	-	-
31	PS04032	DAKAR	2004	Uncomplicated Malaria	12	M	SURVIVOR	0	-	-	-	-	-	-	-	-	-	-	-	-	-	-	-
32	PS04033	DAKAR	2004	Uncomplicated Malaria	34	F	SURVIVOR	0	-	-	-	-	-	-	-	-	-	-	-	-	-	-	-
33	PS04034	DAKAR	2004	Uncomplicated Malaria	-	-	SURVIVOR	0	-	-	-	-	-	-	-	-	-	-	-	-	-	-	-
34	PS04035	DAKAR	2004	Uncomplicated Malaria	14	M	SURVIVOR	0	-	-	-	-	-	-	-	-	-	-	-	-	-	-	-
35	PS04036	DAKAR	2004	Uncomplicated Malaria	52	M	SURVIVOR	0	-	-	-	-	-	-	-	-	-	-	-	-	-	-	-
36	PS04037	DAKAR	2004	Uncomplicated Malaria	31	M	SURVIVOR	0	-	-	-	-	-	-	-	-	-	-	-	-	-	-	-
37	PS04038	DAKAR	2004	Uncomplicated Malaria	31	M	SURVIVOR	0	-	-	-	-	-	-	-	-	-	-	-	-	-	-	-
38	PS04039	DAKAR	2004	Uncomplicated Malaria	16	F	SURVIVOR	0	-	-	-	-	-	-	-	-	-	-	-	-	-	-	-
39	PS04040	DAKAR	2004	Uncomplicated Malaria	-	F	SURVIVOR	0	-	-	-	-	-	-	-	-	-	-	-	-	-	-	-
40	PS04041	DAKAR	2004	Uncomplicated Malaria	72	M	SURVIVOR	0	-	-	-	-	-	-	-	-	-	-	-	-	-	-	-
41	PS04042	DAKAR	2004	Uncomplicated Malaria	53	F	SURVIVOR	0	-	-	-	-	-	-	-	-	-	-	-	-	-	-	-
42	PS04043	DAKAR	2004	Uncomplicated Malaria	27	M	SURVIVOR	0	-	-	-	-	-	-	-	-	-	-	-	-	-	-	-
43	PS04044	DAKAR	2004	Uncomplicated Malaria	2	F	SURVIVOR	0	-	-	-	-	-	-	-	-	-	-	-	-	-	-	-
44	PS04045	DAKAR	2004	Uncomplicated Malaria	2	F	SURVIVOR	0	-	-	-	-	-	-	-	-	-	-	-	-	-	-	-
45	PS04046	DAKAR	2004	Uncomplicated Malaria	28	M	SURVIVOR	0	-	-	-	-	-	-	-	-	-	-	-	-	-	-	-
46	PS04047	DAKAR	2004	Uncomplicated Malaria	-	M	SURVIVOR	0	-	-	-	-	-	-	-	-	-	-	-	-	-	-	-
47	PS04048	DAKAR	2004	Uncomplicated Malaria	16	M	SURVIVOR	0	-	-	-	-	-	-	-	-	-	-	-	-	-	-	-
48	TA12002	TAMABACOUNDA	2012	Uncomplicated Malaria	15	M	SURVIVOR	0	876	-	14.3	43.4	80.4	26.7	32.9	4.16	5.4	302	38.5	43.8	6.8	10.3	0.6
49	TA12003	TAMABACOUNDA	2012	Uncomplicated Malaria	32	M	SURVIVOR	0	7563	-	10.9	33.1	68.9	22.7	33	6.57	4.8	104	63	19.1	16.6	0.8	0.4
50	TA12008	TAMABACOUNDA	2012	Uncomplicated Malaria	10	F	SURVIVOR	0	2666	A+	11.7	35.5	78.5	25.9	33	5.42	4.52	151	49	42	8	0.8	0.2
51	TA12010	TAMABACOUNDA	2012	Uncomplicated Malaria	39	M	SURVIVOR	0	1636	-	13.1	39.8	85.4	28.1	32.9	5.82	4.66	239	43.4	51.3	2.9	2	0.4
52	TA12011	TAMABACOUNDA	2012	Uncomplicated Malaria	6	M	SURVIVOR	0	808	A+	4.6	13.9	88.1	29.1	33	21.46	1.58	166	49.6	30.9	9	9.6	0.9
53	TA12014	TAMABACOUNDA	2012	Uncomplicated Malaria	19	M	SURVIVOR	0	368	-	12.7	40.6	86.1	26.9	31.3	3.41	4.72	194	46.9	45.9	2.6	3.4	1.2
54	TA12015	TAMABACOUNDA	2012	Uncomplicated Malaria	28	M	SURVIVOR	0	300	A+	14.2	45.3	89.7	28.1	31.3	4.03	5.05	222	58.1	37.2	2.7	1.5	0.5
55	TA12017	TAMABACOUNDA	2012	Uncomplicated Malaria	8	F	SURVIVOR	0	2148	-	11.5	34.7	77.5	25.7	33.1	4.35	4.48	389	34.5	50.3	9.1	5	1.1
56	TA12019	TAMABACOUNDA	2012	Uncomplicated Malaria	45	45	SURVIVOR	0	3478	-	12.4	37.6	100.8	33.2	33	4.68	3.73	305	48.2	42.5	5.4	3.1	0.8
57	TA12020	TAMABACOUNDA	2012	Uncomplicated Malaria	26	26	SURVIVOR	0	349	-	8.8	27.2	72.1	23.3	32.4	5.98	3.77	299	84.1	10.6	4.3	0.8	0.2
58	TA12021	TAMABACOUNDA	2012	Uncomplicated Malaria	12	12	SURVIVOR	0	220	B+	8.2	25.6	82.4	26.4	32	1.29	3.11	146	69.9	26.4	2.4	0.9	0.4
59	TA12022	TAMABACOUNDA	2012	Uncomplicated Malaria	45	45	SURVIVOR	0	1230	-	12.9	38.3	96.8	32.6	33.7	5.28	3.96	259	50.7	36	9.5	3.3	0.5
60	TA12026	TAMABACOUNDA	2012	Uncomplicated Malaria	47	47	SURVIVOR	0	1582	-	13	37.6	73.9	25.5	34.6	5.88	5.09	117	78.1	10.1	5.3	6.2	0.3
61	TA12027	TAMABACOUNDA	2012	Uncomplicated Malaria	47	F	SURVIVOR	0	4205	-	12.6	37.9	90.8	30.2	33.3	3.28	4.17	324	39.3	41.6	17	1.2	0.9
62	TA12028	TAMABACOUNDA	2012	Uncomplicated Malaria	16	F	SURVIVOR	0	191	-	8.6	17.1	47.5	23.9	50.3	17.01	3.6	458	79	14.6	5.8	0.5	0.1
63	TA12029	TAMABACOUNDA	2012	Uncomplicated Malaria	48	F	SURVIVOR	0	100740	A+	13.6	42.5	84.9	27.2	32	3.75	5	73	71.5	23.4	3.2	1.4	0.5
64	TA12030	TAMABACOUNDA	2012	Uncomplicated Malaria	49	F	SURVIVOR	0	700	-	11.1	34.2	86.2	28	32.4	2.04	3.97	141	50.8	46.4	0.8	1.9	0.1
65	TA12039	TAMABACOUNDA	2012	Uncomplicated Malaria	30	F	SURVIVOR	0	314	B+	9	25.2	95.9	34.2	35.7	5.28	2.63	157	61.2	35	1.5	2	0.3
66	TA12046	TAMABACOUNDA	2012	Uncomplicated Malaria	12	M	SURVIVOR	0	479	A+	3.5	10.8	59.9	19.3	32.3	18.91	1.81	120	71.7	24.5	3.3	0.2	0.3
67	TA12047	TAMABACOUNDA	2012	Uncomplicated Malaria	5.5	M	SURVIVOR	0	1411	A+	8.9	28.3	79.6	25.1	31.5	6.89	3.55	324	56.7	22	19.2	0.6	1.5
68	TA12051	TAMABACOUNDA	2012	Uncomplicated Malaria	13	F	SURVIVOR	0	2273	O+	10.8	34	74	23.5	31.7	6.7	4.6	208	-	-	-	-	-
69	TA12054	TAMABACOUNDA	2012	Uncomplicated Malaria	8.5	F	SURVIVOR	0	818	-	7.7	22.3	79.2	27.4	34.6	20.43	2.81	521	-	-	-	-	-
70	TA12055	TAMABACOUNDA	2012	Uncomplicated Malaria	10	M	SURVIVOR	0	479	O+	7.5	24	67.8	21.2	31.2	7.98	3.54	164	36.5	51.2	6.6	5.2	0.5
71	TA12056	TAMABACOUNDA	2012	Uncomplicated Malaria	0	-	SURVIVOR	0	275	B+	19.2	56.9	114.1	38.5	33.7	5.72	4.99	219	-	45.2	-	0.3	-
72	TA12057	TAMABACOUNDA	2012	Uncomplicated Malaria	40	F	SURVIVOR	0	695		11.1	33.9	66.7	21.9	32.8	3.7	5.08	233	27.1	55.7	1.9	14.4	0.9
73	TA12059	TAMABACOUNDA	2012	Uncomplicated Malaria	1	M	SURVIVOR	0	533	B+	11.1	32.9	74.7	25.2	33.7	9.5	4.41	490	59.4	34.2	5.7	0.1	0.6
74	TA12060	TAMABACOUNDA	2012	Uncomplicated Malaria	30	F	SURVIVOR	0	880	-	7.7	15.6	54	26.7	49.5	15.91	2.88	13	85.6	9.3	3.6	1.1	0.4
75	TA12061	TAMABACOUNDA	2012	Uncomplicated Malaria	4	F	SURVIVOR	0	233	-	10.7	31.4	87.9	30	34.1	4.3	3.57	323	26.5	56.2	11.4	5.3	0.6
76	TA12062	TAMABACOUNDA	2012	Uncomplicated Malaria	24	M	SURVIVOR	0	528	-	14.6	43.7	88.5	29.6	33.4	4.73	4.94	289	42.8	50.4	4.8	1.7	0.3
77	TA12063	TAMABACOUNDA	2012	Uncomplicated Malaria	28	F	SURVIVOR	0	8390	-	13.2	38.5	77.4	26.5	34.2	2.92	4.98	313	30.8	50.6	12.7	5.3	0.6
78	TA12064	TAMABACOUNDA	2012	Uncomplicated Malaria	0	-	SURVIVOR	0	1870	A -	16.8	47	117.5	42	35.7	6.62	4	331	-	-	-	-	-
79	TA12065	TAMABACOUNDA	2012	Uncomplicated Malaria	29	F	SURVIVOR	0	500	-	12.5	36.3	85.2	29.3	34.4	4.91	4.26	340	57.9	36.7	4.5	0.5	0.4
80	TA12066	TAMABACOUNDA	2012	Uncomplicated Malaria	0	M	SURVIVOR	0	1568	-	19.3	56.2	97.8	33.6	34.3	5.76	5.75	257	29.3	46.1	20.8	3.2	0.6
81	TA12067	TAMABACOUNDA	2012	Uncomplicated Malaria	0	M	SURVIVOR	0	32880	-	12.1	34	117.1	41.7	35.6	12.38	2.9	380	54.8	38.9	4.1	1.9	0.3
82	TA12069	TAMABACOUNDA	2012	Uncomplicated Malaria	52	F	SURVIVOR	0	1770	-	9.7	28.5	84.2	28.7	34.1	5.03	3.38	176	28.9	54.2	5.1	11	0.8
83	TA12070	TAMABACOUNDA	2012	Uncomplicated Malaria	8	F	SURVIVOR	0	1157	-	7.6	21.8	89.9	31.3	34.8	12.43	2.43	446	68.3	20.4	10.2	0.6	0.5
84	TA12071	TAMABACOUNDA	2012	Uncomplicated Malaria	14	F	SURVIVOR	0	8888	AB+	8.8	25.3	82.5	28.7	34.7	15.32	3.07	395	61.8	25.3	11.6	1	0.3
85	TA12072	TAMABACOUNDA	2012	Uncomplicated Malaria	0.75	F	SURVIVOR	0	736	-	8.4	26.9	63.6	19.9	31.2	9.35	4.23	391	52	42.7	2.7	1.7	0.9
86	TA12073	TAMABACOUNDA	2012	Uncomplicated Malaria	9	F	SURVIVOR	0	1846	O+	11.7	35.2	89.4	29.7	33.2	7.87	3.94	226	80.3	11.7	6.9	0.7	0.4
87	TA12074	TAMABACOUNDA	2012	Uncomplicated Malaria	31	M	SURVIVOR	0	444	-	14.5	44.2	86.2	28.3	32.8	4.71	5.13	205	53.3	36.8	5.9	3.1	0.9
88	TA12075	TAMABACOUNDA	2012	Uncomplicated Malaria	4	M	SURVIVOR	0	3407	-	6.8	23.7	78	22.4	28.7	7.15	3.04	400	35.1	54.2	9.7	0.5	0.5
89	TA12076	TAMABACOUNDA	2012	Uncomplicated Malaria	30	F	SURVIVOR	0	207	-	11.5	34.8	88.2	29.2	33.1	3.53	3.94	303	52.5	41.9	4.1	1.1	0.4
90	TA12077	TAMABACOUNDA	2012	Uncomplicated Malaria	1.1	M	SURVIVOR	0	80	B+	7.2	27.9	55.3	17.9	32.3	8.89	5.04	357	30.9	59.5	8.1	0.8	0.7
91	TA12078	TAMABACOUNDA	2012	Uncomplicated Malaria	1.5	M	SURVIVOR	0	68	O+	17	22.8	47.2	14.9	31.6	39.5	4.82	523	-	-	-	-	-
92	TA12079	TAMABACOUNDA	2012	Uncomplicated Malaria	0	F	SURVIVOR	0	558	O+	17	51.7	100.9	33.2	32.9	16.3	5.12	62	77.9	15.4	5.3	1.2	0.2
93	TA12082	TAMABACOUNDA	2012	Uncomplicated Malaria	44	F	SURVIVOR	0	268	-	12.8	38.9	82.5	27.1	32.9	5.73	4.72	196	44.3	42.2	2.7	10.1	0.7
94	TA12085	TAMABACOUNDA	2012	Uncomplicated Malaria	1.2	F	SURVIVOR	0	211	B+	10.8	32.6	73.9	24.5	33.1	8.35	4.41	436	29.8	58.4	9.5	1.4	0.9
95	TA12086	TAMABACOUNDA	2012	Uncomplicated Malaria	5	M	SURVIVOR	0	628	B+	11.8	35.4	76.7	25.6	33.4	8.61	4.61	319	22.8	61.4	7.9	7.3	0.6
96	TA12087	TAMABACOUNDA	2012	Uncomplicated Malaria	10	M	SURVIVOR	0	623	B+	12.8	37.4	81.9	28	34.2	4.39	4.57	332	49.9	40.7	7.8	1	0.6
97	TA12088	TAMABACOUNDA	2012	Uncomplicated Malaria	38	F	SURVIVOR	0	657	-	9.9	28.9	84.1	28.8	34.2	8.59	3.44	268	81.6	15.8	1.7	0.6	0.3
98	TA12089	TAMABACOUNDA	2012	Uncomplicated Malaria	8	F	SURVIVOR	0	1688	B+	12.8	39.2	82	26.8	32.7	8.23	4.78	275	54.8	33.4	6.5	5	0.3
99	TA12090	TAMABACOUNDA	2012	Uncomplicated Malaria	0	F	SURVIVOR	0	360	B+	16.7	48.3	105.6	36.5	34.6	10.7	4.57	352	72.6	20.1	6.8	0.2	0.3
100	TA12091	TAMABACOUNDA	2012	Uncomplicated Malaria	0	F	SURVIVOR	0	130	B+	19.7	56.6	105.8	36.8	34.8	10.39	5.35	188	64	22.7	12.4	0.5	0.4
101	TA12092	TAMABACOUNDA	2012	Uncomplicated Malaria	1	F	SURVIVOR	0	1000	O+	8.7	27.9	76.1	23.7	31.2	9.63	3.67	388	25.8	62.6	10.5	0.4	0.7
102	TA12093	TAMABACOUNDA	2012	Uncomplicated Malaria	11	F	SURVIVOR	0	752	B+	2.8	8.2	85.2	29.2	34	4.74	0.96	141	63.9	26.5	8.2	1.1	0.3
103	TA12096	TAMABACOUNDA	2012	Uncomplicated Malaria	45	M	SURVIVOR	0	240	-	16.6	50.1	84.5	28	33.1	16.46	5.93	116	91.6	5	2.9	0.4	0.1
104	TA12098	TAMABACOUNDA	2012	Uncomplicated Malaria	11	M	SURVIVOR	0	229	A+	13.2	39.8	84.6	28.1	33.2	9.61	4.7	217	25	33.8	2.6	36.9	1.3
105	TA12100	TAMABACOUNDA	2012	Uncomplicated Malaria	11	F	SURVIVOR	0	240	A+	11.8	35.4	74.2	24.7	33.3	5.82	4.77	152	15.9	77.4	2.6	3.5	0.6
106	TA12101	TAMABACOUNDA	2012	Uncomplicated Malaria	11	M	SURVIVOR	0	513	O+	13.1	43.2	72.3	21.9	30.3	3.5	5.97	251	34.1	56.4	4.9	4.1	0.5
107	TA12102	TAMABACOUNDA	2012	Uncomplicated Malaria	10	F	SURVIVOR	0	2051	-	8.5	24.4	92.6	32.2	34.8	12.5	2.64	456	45.4	44	6.7	3.3	0.6
108	PS13001	DAKAR	2013	Uncomplicated Malaria	74	M	SURVIVOR	0	117	NEGATIVE	-	-	-	-	-	-	-	-	-	-	-	-	-
109	PS13002	DAKAR	2013	Uncomplicated Malaria	11	F	SURVIVOR	0	321	-	-	-	-	-	-	-	-	-	-	-	-	-	-
110	PS13003	DAKAR	2013	Uncomplicated Malaria	23	F	SURVIVOR	0	56	-	-	-	-	-	-	-	-	-	-	-	-	-	-
111	PS13004	DAKAR	2013	Uncomplicated Malaria	33	M	SURVIVOR	0	80	-	-	-	-	-	-	-	-	-	-	-	-	-	-
112	PS13005	DAKAR	2013	Uncomplicated Malaria	26	F	SURVIVOR	0	4521	-	-	-	-	-	-	-	-	-	-	-	-	-	-
113	PS13006	DAKAR	2013	Uncomplicated Malaria	5	F	SURVIVOR	0	24652	-	-	-	-	-	-	-	-	-	-	-	-	-	-
114	PS13007	DAKAR	2013	Uncomplicated Malaria	18	M	SURVIVOR	0	120	A+	12.1	35.6	85	29	34	4.2	4.17	207	46.1	36.3	15	0.5	2.1
115	PS13008	DAKAR	2013	Uncomplicated Malaria	18	M	SURVIVOR	0	520	A+	15.3	44.8	88	30	34.2	11.3	5.1	140	77.3	10.2	9.7	1.3	1.5
116	PS13009	DAKAR	2013	Uncomplicated Malaria	10	F	SURVIVOR	0	2800	O+	11.3	32.5	81	28.1	34.8	8.7	4.02	139	69.5	16.9	10	3.1	0.5
117	PS13010	DAKAR	2013	Uncomplicated Malaria	13	F	SURVIVOR	0	300	B+	12.6	38.4	82	26.8	32.8	5.2	4.71	239	50.6	38.1	2.9	6.3	2.1
118	PS13013	DAKAR	2013	Uncomplicated Malaria	11	F	SURVIVOR	0	1320	O+	11.5	34.1	79	26.7	33.7	7.5	4.3	151	88.8	8.2	0.9	1.9	0.2
119	PS13014	DAKAR	2013	Uncomplicated Malaria	-	F	SURVIVOR	0	80	-	-	-	-	-	-	-	-	-	-	-	-	-	-
120	PS13012	DAKAR	2013	Uncomplicated Malaria	28	M	SURVIVOR	0	1263	A+	13.2	39.7	89	29.5	33.2	6	4.48	148	63	21.6	13.5	0.4	1.5
121	PS14001	DAKAR	2014	Uncomplicated Malaria	-	M	SURVIVOR	0	2541	-	-	-	-	-	-	-	-	-	-	-	-	-	-
122	PS14002	DAKAR	2014	Uncomplicated Malaria	33	M	SURVIVOR	0	758	-	12.5	37.6	80	27.4	33.2	5.9	4.57	237	54.1	29.2	15.2	0.1	1.4
123	PS14003	DAKAR	2014	Uncomplicated Malaria	-	-	SURVIVOR	0	Négative	-	-	-	-	-	-	-	-	-	-	-	-	-	-
124	PS14004	DAKAR	2014	Uncomplicated Malaria	29	M	SURVIVOR	0	350	-	14.9	44	87	29.6	33.9	6.7	5.03	297	38.9	37.6	12.4	9.5	1.6
125	DA14001	DIAMNIADIO	2014	Uncomplicated Malaria	-	M	SURVIVOR	0	8717	-	10.9	32.1	72.3	24.5	34	8.51	4.44	147	73.5	17	9.4	0	0.1
126	DA14026	DIAMNIADIO	2014	Uncomplicated Malaria	7	M	SURVIVOR	0	1440	-	10.3	30.6	78.5	26.4	33.7	7.18	3.9	96	48.6	35.4	14.9	0.7	0.4
127	DA14031	DIAMNIADIO	2014	Uncomplicated Malaria	12	F	SURVIVOR	0	34080	-	11	31.9	74.2	25.6	34.5	10.86	4.3	70	69.3	24.8	5.7	0.1	0.1
128	DA14035	DIAMNIADIO	2014	Uncomplicated Malaria	5	F	SURVIVOR	0	10000	-	9.1	27.3	75	25	33.3	7.4	3.64	50	62.4	27.3	9.7	0.1	0.5
129	DA14038	DIAMNIADIO	2014	Uncomplicated Malaria	5	-	SURVIVOR	0	4680	-	11.3	34.9	79.1	25.6	32.4	11.14	4.41	174	81	14.1	4.7	0.1	0.1
130	TA14001	TAMABACOUNDA	2014	Uncomplicated Malaria	25	M	SURVIVOR	0	391	-	10.7	30.7	87	30.7	34.9	12.31	3.49	48	-	-	-	-	-
131	TA14002	TAMABACOUNDA	2014	Uncomplicated Malaria	0	F	SURVIVOR	0	82	-	15.3	42.8	106	37.9	35.7	10.19	4.04	347	-	-	-	-	-
132	TA14003	TAMABACOUNDA	2014	Uncomplicated Malaria	42	M	SURVIVOR	0	6880	-	13.7	41.4	89.2	29.5	33.1	5.2	4.64	47	-	-	-	-	-
133	TA14004	TAMABACOUNDA	2014	Uncomplicated Malaria	-	-	SURVIVOR	0	140	-	14	42.2	90.7	30.1	33.2	5.73	4.65	272	-	-	-	-	-
134	TA14005	TAMABACOUNDA	2014	Uncomplicated Malaria	-	-	SURVIVOR	0	966	-	10.3	31.3	88.4	29.1	32.9	2.79	3.54	59	-	-	-	-	-
135	TA14006	TAMABACOUNDA	2014	Uncomplicated Malaria	30	F	SURVIVOR	0	284	-	12.1	36.2	91.2	30.5	33.4	3.51	3.97	117	-	-	-	-	-
136	TA14007	TAMABACOUNDA	2014	Uncomplicated Malaria	0.25	5	SURVIVOR	0	35	-	6.5	19.9	85.6	27.9	32.6	26.25	2.33	124	-	-	-	-	-
137	TA14008	TAMABACOUNDA	2014	Uncomplicated Malaria	0	F	SURVIVOR	0	1466	-	14.7	42.7	105	36.1	34.4	13.56	4.07	71	-	-	-	-	-
138	TA14010	TAMABACOUNDA	2014	Uncomplicated Malaria	11	M	SURVIVOR	0	102000	-	9.9	30.1	81	26.6	32.9	5.48	3.72	24	-	-	-	-	-
139	TA14011	TAMABACOUNDA	2014	Uncomplicated Malaria	13	F	SURVIVOR	0	2455	-	-	-	-	-	-	-	-	-	-	-	-	-	-
140	TA14012	TAMABACOUNDA	2014	Uncomplicated Malaria	0	M	SURVIVOR	0	188	-	14.3	44.3	110	35.6	32.3	-	4.02	148	-	-	-	-	-
141	TA14013	TAMABACOUNDA	2014	Uncomplicated Malaria	7	M	SURVIVOR	0	99	-	10.8	31.6	86.8	29.7	34.2	8.6	3.64	276	-	-	-	-	-
142	TA14017	TAMABACOUNDA	2014	Uncomplicated Malaria	0	M	SURVIVOR	0	1274	-	15.7	45.7	102	35.3	34.4	4.64	4.45	198	-	-	-	-	-
143	TA14019	TAMABACOUNDA	2014	Uncomplicated Malaria	37	M	SURVIVOR	0	259	-	13.4	42	93.6	30.6	32.7	4.16	4.38	225	-	-	-	-	-
144	TA14020	TAMABACOUNDA	2014	Uncomplicated Malaria	30	M	SURVIVOR	0	76	-	10.3	30.4	100.7	34.1	33.9	5.1	3.02	202	-	-	-	-	-
145	TA14021	TAMABACOUNDA	2014	Uncomplicated Malaria	44	M	SURVIVOR	0	242	-	12.2	35.2	93.6	32.4	34.7	6.42	3.76	159	-	-	-	-	-
146	TA14022	TAMABACOUNDA	2014	Uncomplicated Malaria	8	M	SURVIVOR	0	568	-	8.6	23.6	86.2	28.2	32.7	3.57	3.05	256	-	-	-	-	-
147	TA14023	TAMABACOUNDA	2014	Uncomplicated Malaria	-	-	SURVIVOR	0	457	-	7.5	22.4	107.9	36.1	33.4	9.75	2.08	155	-	-	-	-	-
148	TA14024	TAMABACOUNDA	2014	Uncomplicated Malaria	-	-	SURVIVOR	0	17480	-	10.1	31.9	79.7	25.3	31.7	6.17	4	24	-	-	-	-	-
149	TA14025	TAMABACOUNDA	2014	Uncomplicated Malaria	2	F	SURVIVOR	0	252	-	12.2	-	-	-	-	-	-	256	-	-	-	9.9	0.5
150	TA14026	TAMABACOUNDA	2014	Uncomplicated Malaria	15	F	SURVIVOR	0	153	O+	9.5	28.2	88.1	29.7	33.7	6.18	3.2	318	-	-	-	2.4	0.7
151	TA14027	TAMABACOUNDA	2014	Uncomplicated Malaria	40	M	SURVIVOR	0	237	-	12.7	38.4	84.4	27.9	33.1	6.2	4.55	306	-	-	-	-	-
152	TA14028	TAMABACOUNDA	2014	Uncomplicated Malaria	0	F	SURVIVOR	0	1345	0+	14.1	42.7	107.9	35.6	33	6.8	3.96	133	-	-	-	-	-
153	TA14029	TAMABACOUNDA	2014	Uncomplicated Malaria	9	M	SURVIVOR	0	241	0+	9.8	29.4	87.3	29.1	33.3	5.12	3.37	113	-	-	-	7.6	0.5
154	TA14030	TAMABACOUNDA	2014	Uncomplicated Malaria	0	M	SURVIVOR	0	391	A+	7.6	25.4	73.8	22.1	29.9	8.51	3.44	347	-	-	-	0.8	0.4
155	TA14031	TAMABACOUNDA	2014	Uncomplicated Malaria	0	F	SURVIVOR	0	45	B+	13.2	41	85.5	27.6	32.2	8.08	4.79	210	-	-	-	5.8	0.2
156	TA14032	TAMABACOUNDA	2014	Uncomplicated Malaria	0	M	SURVIVOR	0	1283	A+	14.5	45.8	97.5	30.9	31.6	7.47	4.7	161	-	-	-	5.2	0.6
157	TA14033	TAMABACOUNDA	2014	Uncomplicated Malaria	0	M	SURVIVOR	0	800	O+	15.8	47.8	107	33.3	33	9.03	4.75	103	-	-	-	-	-
158	TA14035	TAMABACOUNDA	2014	Uncomplicated Malaria	0	F	SURVIVOR	0	1086	0+	13.2	39.3	115.5	38.8	33.6	7.6	3.4	283	-	-	-	3.6	0.3
159	TA14036	TAMABACOUNDA	2014	Uncomplicated Malaria	0	F	SURVIVOR	0	944	A+	15.2	45.6	103.7	34.5	33.3	7.97	4.4	286	-	-	-	4.7	0.3
160	TA14037	TAMABACOUNDA	2014	Uncomplicated Malaria	0	F	SURVIVOR	0	440	0+	18	52.7	104.8	35.8	34.1	6.58	5.03	256	-	-	-	6.5	0.6
161	TA14038	TAMABACOUNDA	2014	Uncomplicated Malaria	53	F	SURVIVOR	0	126	-	11.1	33.1	91.8	30.7	33.5	2.82	3.61	217	-	-	-	-	-
162	TA14040	TAMABACOUNDA	2014	Uncomplicated Malaria	20	F	SURVIVOR	0	823	-	11.4	35.2	85.1	27.5	32.4	4.13	4.14	240	-	-	-	-	-
163	TA14041	TAMABACOUNDA	2014	Uncomplicated Malaria	21	F	SURVIVOR	0	30	-	11.6	34.6	94.4	31.7	33.6	1.78	3.66	175	-	-	-
164	TA14043	TAMABACOUNDA	2014	Uncomplicated Malaria	-	F	SURVIVOR	0	2440	-	12.7	41.7	90.6	27.6	30.5	10.31	4.6	201	-	-	-
165	TA14046	TAMABACOUNDA	2014	Uncomplicated Malaria	0	F	SURVIVOR	0	105	A+	13.5	41.1	81.8	26.9	32.9	5.13	5.02	78	-	-	-	4.6	0.6
166	TA14047	TAMABACOUNDA	2014	Uncomplicated Malaria	71	F	SURVIVOR	0	80	-	15.5	45	106	36.1	34.1	13.74	4.29	236	-	-	-	-	-
167	TA14048	TAMABACOUNDA	2014	Uncomplicated Malaria	0	F	SURVIVOR	0	281	B+	14.9	44.1	96.7	32.7	33.8	7.18	4.56	220	-	-	-	3.6	0.3
168	TA14049	TAMABACOUNDA	2014	Uncomplicated Malaria	0	F	SURVIVOR	0	35	O-	12.9	38.6	92.5	30.9	33.4	11.78	4.17	131	-	-	-	-	-
169	TA14050	TAMABACOUNDA	2014	Uncomplicated Malaria	0	F	SURVIVOR	0	30	O+	14.1	41.6	102.3	34.6	33.9	11.68	4.07	246	-	-	-	1.1	0.4
170	TA14051	TAMABACOUNDA	2014	Uncomplicated Malaria	36	M	SURVIVOR	0	149	-	13.9	44.3	86.1	27	31.4	4.32	5.14	248	-	-	-	-	-
171	TA14052	TAMABACOUNDA	2014	Uncomplicated Malaria	13	F	SURVIVOR	0	137	A+	6.1	17.6	95.1	33	34.7	26.45	1.85	192	-	-	-	-	-
172	TA14054	TAMABACOUNDA	2014	Uncomplicated Malaria	41	F	SURVIVOR	0	160	-	10.1	32	96.9	32.1	32.6	4.76	3.2	160	-	-	-	-	-
173	TA14055	TAMABACOUNDA	2014	Uncomplicated Malaria	32	M	SURVIVOR	0	90	-	12.9	39.1	87.2	28.8	33	8.33	4.48	256	-	-	-	-	-
174	TA14058	TAMABACOUNDA	2014	Uncomplicated Malaria	44	F	SURVIVOR	0	200	-	9.5	29.5	73.1	23.6	32.2	4.02	4.03	262	-	-	-
175	TA14060	TAMABACOUNDA	2014	Uncomplicated Malaria	30	F	SURVIVOR	0	315	-	13.1	39.2	88.3	29.5	33.4	10.22	4.44	163	-	-	-
176	TA14062	TAMABACOUNDA	2014	Uncomplicated Malaria	8	M	SURVIVOR	0	77	-	10.6	32.2	-	-	-	8.09	4.19	267	-	-	-
177	TA14063	TAMABACOUNDA	2014	Uncomplicated Malaria	0	M	SURVIVOR	0	480	O+	6.3	35.5	-	-	-	9.29	3.23	480	-	-	-	-	-
178	TA14064	TAMABACOUNDA	2014	Uncomplicated Malaria	0	-	SURVIVOR	0	637	A+	17.1	49.9	-	-	-	4.68	4.45	637	-	-	-	-	-
179	TA14065	TAMABACOUNDA	2014	Uncomplicated Malaria	0	-	SURVIVOR	0	1163	O+	9.8	29.3	-	-	-	5.89	3.38	1163	-	-	-	-	-
180	TA14066	TAMABACOUNDA	2014	Uncomplicated Malaria	0	-	SURVIVOR	0	1166	O+	16.9	52.4	-	-	-	9.61	5.84	1166	-	-	-	-	-
181	TA14067	TAMABACOUNDA	2014	Uncomplicated Malaria	0	F	SURVIVOR	0	313	O+	13.5	39	-	-	-	16.22	3.72	313	-	-	-	-	-
182	TA14068	TAMABACOUNDA	2014	Uncomplicated Malaria	0	M	SURVIVOR	0	1192	O+	15.2	45	-	-	-	11.63	4.57	1192	-	-	-	-	-
183	TA14072	TAMABACOUNDA	2014	Uncomplicated Malaria	0	F	SURVIVOR	0	140	B+	16.7	49.3	-	-	-	7.2	5.36	140	-	-	-	-	-
184	TA14073	TAMABACOUNDA	2014	Uncomplicated Malaria	0	M	SURVIVOR	0	440	B+	14.1	42.3	-	-	-	8.27	3.41	440	-	-	-	-	-
185	TA14076	TAMABACOUNDA	2014	Uncomplicated Malaria	0	F	SURVIVOR	0	126	B+	13.3	38.1	-	-	-	11.9	3.26	126	-	-	-	-	-
186	TA14077	TAMABACOUNDA	2014	Uncomplicated Malaria	17	M	SURVIVOR	0	413	-	10.7	32.6	-	-	-	5.87	4.72	413	-	-	-	-	-
187	TA14079	TAMABACOUNDA	2014	Uncomplicated Malaria	0.16	M	SURVIVOR	0	66	B+	8.1	24.3	-	-	-	15.9	2.6	66	-	-	-	-	-
188	TA14080	TAMABACOUNDA	2014	Uncomplicated Malaria	0	M	SURVIVOR	0	731	-	-	-	-	-	-	-	-	731	-	-	-	-	-
189	TA14081	TAMABACOUNDA	2014	Uncomplicated Malaria	0	-	SURVIVOR	0	153	O+	13.9	39	-	-	-	23.11	4.05	199	-	-	-	-
190	TA14082	TAMABACOUNDA	2014	Uncomplicated Malaria	-	F	SURVIVOR	0	193	O+	9.3	28.9	-	-	-	7.86	4.16	376	-	-	-	-
191	TA14083	TAMABACOUNDA	2014	Uncomplicated Malaria	63	M	SURVIVOR	0	80	-	12.8	36.9	-	-	-	4.04	2.68	191	-	-	-	-	-
192	TA14084	TAMABACOUNDA	2014	Uncomplicated Malaria	0	F	SURVIVOR	0	70	A+	15.6	45.5	-	-	-	9.3	4.8	220	-	-	-	-	-
193	TA14086	TAMABACOUNDA	2014	Uncomplicated Malaria	4	F	SURVIVOR	0	100	B+	9.6	26.7	-	-	-	21.3	3.75	172	-	-	-	-	-
194	TA14087	TAMABACOUNDA	2014	Uncomplicated Malaria	0	F	SURVIVOR	0	561	A+	13.7	40.5	-	-	-	6.21	4.29	137	-	-	-	-	-
195	TA14089	TAMABACOUNDA	2014	Uncomplicated Malaria	0	M	SURVIVOR	0	3211	O+	9.6	44.8	-	-	-	6.85	4.23	204	-	-	-	-	-
196	TA14090	TAMABACOUNDA	2014	Uncomplicated Malaria	30	M	SURVIVOR	0	253	-	10	27.9	-	-	-	7	3.36	326	-	-	-	-	-
197	TA14091	TAMABACOUNDA	2014	Uncomplicated Malaria	45	F	SURVIVOR	0	80	-	11.2	32.3	-	-	-	5.14	3.51	194	-	-	-	-	-
198	TA14093	TAMABACOUNDA	2014	Uncomplicated Malaria	0	F	SURVIVOR	0	125	A+	18.2	52.6	-	-	-	15	4.83	252	-	-	-	-	-
199	TA14096	TAMABACOUNDA	2014	Uncomplicated Malaria	63	-	SURVIVOR	0	140	-	14.9	44.9	-	-	-	4.37	5.34	228	-	-	-	-	-
200	TA14097	TAMABACOUNDA	2014	Uncomplicated Malaria	-	-	SURVIVOR	0	347	-	11.9	34.9	-	-	-	4.09	3.8	110	-	-	-	-	-
201	TA14098	TAMABACOUNDA	2014	Uncomplicated Malaria	0	-	SURVIVOR	0	61	O+	14.7	43.3	-	-	-	13.5	4.29	327	-	-	-	-	-
202	TA14100	TAMABACOUNDA	2014	Uncomplicated Malaria	0	F	SURVIVOR	0	80	B+	16.7	48.9	-	-	-	8.78	5.29	76	-	-	-	-	-
203	TA14101	TAMABACOUNDA	2014	Uncomplicated Malaria	0	F	SURVIVOR	0	236	B+	14.3	42.9	-	-	-	11.2	4.17	246	-	-	-	-	-
204	TA14102	TAMABACOUNDA	2014	Uncomplicated Malaria	0	F	SURVIVOR	0	236	B+	14.4	43.3	-	-	-	8.99	4.25	258	-	-	-	-	-
205	TA14103	TAMABACOUNDA	2014	Uncomplicated Malaria	0	F	SURVIVOR	0	154	O+	14.5	41.1	-	-	-	14.7	3.83	75	-	-	-	-	-
206	TA14104	TAMABACOUNDA	2014	Uncomplicated Malaria	0	F	SURVIVOR	0	60	B+	15.5	45.5	-	-	-	16	4.29	156	-	-	-	-	-
207	TA14107	TAMABACOUNDA	2014	Uncomplicated Malaria	42	F	SURVIVOR	0	396	-	9.6	30.4	-	-	-	3.24	3.88	254	-	-	-	-	-
208	TA14108	TAMABACOUNDA	2014	Uncomplicated Malaria	17	F	SURVIVOR	0	140	A+	5.4	17.5	-	-	-	5.2	2.2	392	-	-	-	-	-
209	TA14109	TAMABACOUNDA	2014	Uncomplicated Malaria	0	-	SURVIVOR	0	312	A+	15.8	44.5	-	-	-	15.3	4.51	207	-	-	-	-	-
210	TA14110	TAMABACOUNDA	2014	Uncomplicated Malaria	0	M	SURVIVOR	0	748	O+	14.6	43	-	-	-	9.53	4.2	190	-	-	-	-	-
211	TA14112	TAMABACOUNDA	2014	Uncomplicated Malaria	0	M	SURVIVOR	0	248	O+	13.7	38.4	-	-	-	6.4	3.93	89	-	-	-	-	-
212	TA14113	TAMABACOUNDA	2014	Uncomplicated Malaria	42	M	SURVIVOR	0	223	-	11.1	32.4	-	-	-	12.16	3.8	353	-	-	-	-	-
213	TA14116	TAMABACOUNDA	2014	Uncomplicated Malaria	0	-	SURVIVOR	0	210	-	15.4	45.6	-	-	-	25.62	4.46	269	-	-	-	-	-
214	TA14117	TAMABACOUNDA	2014	Uncomplicated Malaria	0	M	SURVIVOR	0	3000	-	18.6	51.7	-	-	-	4.7	4.85	100	-	-	-	-	-
215	TA14118	TAMABACOUNDA	2014	Uncomplicated Malaria	8	M	SURVIVOR	0	1600	-	6.9	20	-	-	-	11.9	2.36	291	-	-	-	-	-
216	TA14119	TAMABACOUNDA	2014	Uncomplicated Malaria	0	M	SURVIVOR	0	960	O+	14.6	48.2	-	-	-	5	5.06	119	-	-	-	-	-
217	TA14120	TAMABACOUNDA	2014	Uncomplicated Malaria	7	F	SURVIVOR	0	313	-	9.3	27.5	-	-	-	18.7	3.2	374	-	-	-	-	-
218	TA14121	TAMABACOUNDA	2014	Uncomplicated Malaria	12	F		0	313	-	6.5	27.5	-	-	-	18.7	3.2	208	-	-	-	-	-
219	TA14123	TAMABACOUNDA	2014	Uncomplicated Malaria	0	F	SURVIVOR	0	203	-	-	41.6	-	-	-	8.7	4.5	-	-	-	-	-	-
220	LG14005	LOUGA	2014	Uncomplicated Malaria	4	M	SURVIVOR	-	4000	-	10.1	29.1	74	25.8	34.8	10.1	3.93	149	-		-
221	LG14008	LOUGA	2014	Uncomplicated Malaria	23	F	SURVIVOR	0	320	-	10.7	38.9	76.5	21	27.5	10.3	5.09	121	-	-	-	-	-
222	LG14009	LOUGA	2014	Uncomplicated Malaria	26	F	SURVIVOR	0	1200	-	14.8	47.7	85.7	26.5	31	6.2	5.57	369	-	-	-	-	-
223	LG14014	LOUGA	2014	Uncomplicated Malaria	6	F	SURVIVOR	0	1200	-	9.8	28.5	88	30.1	34.4	7	3.25	91	-	-	-	-	-
224	LG14015	LOUGA	2014	Uncomplicated Malaria	6	M	SURVIVOR	-	27120	-	10.7	30.6	79	27.4	34.8	-	-	-	-
225	LG14016	LOUGA	2014	Uncomplicated Malaria	10	F	SURVIVOR	-	-	-	-	-	-	-	-	-	-	-	-
226	LG14017	LOUGA	2014	Uncomplicated Malaria	5	M	SURVIVOR	0	-	-	-	-	-	-	-	-	-	-	-	-	-	-	-
227	LG14018	LOUGA	2014	Uncomplicated Malaria	18	M	SURVIVOR	0	-	-	-	-	-	-	-	-	-	-	-	-	-	-	-
228	SL14001	SAINT LOUIS	2014	Uncomplicated Malaria	35	F	SURVIVOR	0	320	-	12.9	39.9	-	-	-	20.5	4.83	257	-	-	-	-	-
229	SL14002	SAINT LOUIS	2014	Uncomplicated Malaria	30	F	SURVIVOR	0	2000	-	8.9	27.6	-	-	-	10	3.26	263	-	-	-	-	-
230	SL14003	SAINT LOUIS	2014	Uncomplicated Malaria	15	F	SURVIVOR	0	490	-	12.6	37.8	-	-	-	10.6	4.95	348	-	-	-	-	-
231	SL14004	SAINT LOUIS	2014	Uncomplicated Malaria	25	F	SURVIVOR	0	842	-	13	39.2	-	-	-	8.8	4.81	366	-	-	-	-	-
232	SL14005	SAINT LOUIS	2014	Uncomplicated Malaria	0	F	SURVIVOR	0	1520	-	8.5	27.3	-	-	-	16.7	4.32	503	-	-	-	-	-
233	SL14006	SAINT LOUIS	2014	Uncomplicated Malaria	-	M	SURVIVOR	0	1050	-	15.5	45.2	-	-	-	3.9	5.07	113	-	-	-	-	-
234	SL14007	SAINT LOUIS	2014	Uncomplicated Malaria	-	F	SURVIVOR	0	4740	-	12.2	40.6	-	-	-	4	3.62	227	-	-	-	-	-
235	SL14008	SAINT LOUIS	2014	Uncomplicated Malaria	33	F	SURVIVOR	0	2800	-	14.3	43.1	-	-	-	20.8	5.13	267	-	-	-	-	-
236	SL14009	SAINT LOUIS	2014	Uncomplicated Malaria	-	F	SURVIVOR	0	240	-	11.3	36.9	-	-	-	21.9	4.09	873	-	-	-	-	-
237	SL14010	SAINT LOUIS	2014	Uncomplicated Malaria	31	F	SURVIVOR	0	360	-	16	50.7	-	-	-	6.7	5.3	233	-	-	-	-	-
238	KO15002	KOLDA	2015	Uncomplicated Malaria	20	M	SURVIVOR	0	8283	-	11.2	35.3	97.8	31	31.7	4.8	3.61	61	41.6	12.1	-	-	-
239	KO15020	KOLDA	2015	Uncomplicated Malaria	77	M	SURVIVOR	0	300	-	9.2	26.8	82.2	28.2	34.3	7.6	3.26	133	57.6	31	-	-	-
240	KO15021	KOLDA	2015	Uncomplicated Malaria	34	M	SURVIVOR	0	563		10.9	33.2	86.5	28.4	32.8	2.9	3.9	60	75.8	15.3
241	KO15026	KOLDA	2015	Uncomplicated Malaria	14	F	SURVIVOR	0	16432	-	8.2	25.4	93.4	30.1	32.3	4.5	2.72	158	55.7	30.3	-	-	-
242	KO15032	KOLDA	2015	Uncomplicated Malaria	55	M	SURVIVOR	0	716	-	13.9	40.2	87.8	30.3	34.6	5.8	4.58	159	74.3	12.9	-	-	-
243	KO15033	KOLDA	2015	Uncomplicated Malaria	36	F	SURVIVOR	0	350	-	12.3	36.3	74.5	25.3	33.9	7.5	4.87	233	65.1	29.6	-	-	-
244	KO15043	KOLDA	2015	Uncomplicated Malaria	26	M	SURVIVOR	0	16650	-	14.3	43.6	84.5	27.7	32.8	4.6	5.16	162	36.3	24.6	-	-	-
245	KO15045	KOLDA	2015	Uncomplicated Malaria	4	F	SURVIVOR	0	707	-	12.4	36.8	82.5	27.8	33.7	6.1	4.46	52	74.2	20	-	-	-
246	KO15049	KOLDA	2015	Uncomplicated Malaria	66	M	SURVIVOR	0	5083	-	11	34.5	73.7	23.5	31.9	10.7	4.68	431	48.5	41.9	-	-	-
247	KO15059	KOLDA	2015	Uncomplicated Malaria	24	M	SURVIVOR	0	10650	-	12.7	39	84.4	27.5	32.4	4.3	4.62	103	31	42.1	-	-	-
248	KO15070	KOLDA	2015	Uncomplicated Malaria	68	F	SURVIVOR	0	10604	-	11.1	35.2	89.3	28.1	31.5	5.1	3.95	102	59.6	30.3	-	-	-
249	KO15071	KOLDA	2015	Uncomplicated Malaria	18	M	SURVIVOR	0	17142	-	10.8	33.9	84	26.7	31.8	5.9	4.04	93	53.1	34.6	-	-	-
250	KO15072	KOLDA	2015	Uncomplicated Malaria	36	M	SURVIVOR	0	32888	-	15.8	48.5	96.5	31.4	32	6	5.03	101	41.4	45	-	-	-
251	KO15073	KOLDA	2015	Uncomplicated Malaria	60	M	SURVIVOR	0	118280	-	11.2	35.4	84.8	26.7	31.6	5	4.18	42	31.2	58.2	-	-	-
252	KO15074	KOLDA	2015	Uncomplicated Malaria	5	F	SURVIVOR	0	36000	-	10.1	32.8	85	26	30.7	2.7	3.87	83	64.3	28.3	-	-	-
253	KO15075	KOLDA	2015	Uncomplicated Malaria	46	F	SURVIVOR	0	74909	-	11.3	35.8	93.7	29.5	31.5	4.7	3.83	35	51.6	38.8	-	-	-
254	KO15076	KOLDA	2015	Uncomplicated Malaria	17	F	SURVIVOR	0	4800	-	12.8	40.4	86.4	27.3	31.6	7	4.68	123	57.9	35	-	-	-
255	KO15077	KOLDA	2015	Uncomplicated Malaria	70	F	SURVIVOR	0	16888	-	9.1	28.8	87.2	27.4	31.5	5.3	3.31	56	61.6	29.7	-	-	-
256	KO15078	KOLDA	2015	Uncomplicated Malaria	6	M	SURVIVOR	0	2666	-	6.1	20.6	72.1	22	32	6.9	2.86	74	36.5	51.9	-	-	-
257	KO15079	KOLDA	2015	Uncomplicated Malaria	30	F	SURVIVOR	0	11555	-	8.1	27	83.6	25	30	4.3	3.23	121	39.8	31.4	-	-	-
258	KO15081	KOLDA	2015	Uncomplicated Malaria	60	M	SURVIVOR	0	5800	-	14	43	81.1	26.3	32.5	7.5	5.31	43	63.8	24.4	-	-	-
259	KO15082	KOLDA	2015	Uncomplicated Malaria	48	M	SURVIVOR	0	89818	-	11	35.8	85.8	26.2	30.6	8.5	4.19	187	68.9	22.2	-	-	-
260	KO15083	KOLDA	2015	Uncomplicated Malaria	15	F	SURVIVOR	0	106857	-	10.6	33.1	80.3	25.6	32	7.6	4.13	105	59.8	28.9	-	-	-
261	KO15090	KOLDA	2015	Uncomplicated Malaria		F	SURVIVOR	0	420	-	7	22	78.3	24.9	31.8	8.4	2.81	192	68.4	26	-	-	-
262	KO15095	KOLDA	2015	Uncomplicated Malaria	18	F	SURVIVOR	0	3400	-	7.5	23.7	73.1	23.1	31.6	13.1	3.24	170	86.9	6.9	-	-	-
263	KO15096	KOLDA	2015	Uncomplicated Malaria	4	F	SURVIVOR	0	3420	-	11.7	35.2	78.2	26	33.2	10.6	4.5	356	37.9	54.7	-	-	-
264	KO15099	KOLDA	2015	Uncomplicated Malaria	18	M	SURVIVOR	0	8970	-	13.5	41.2	81.3	32.8		2.7	5.07	61	44.8	42.2	-	-	-
265	KO15102	KOLDA	2015	Uncomplicated Malaria	25	F	SURVIVOR	0	354	-	12.2	36.8	83.6	27.7	33.2	10.5	4.4	68	86.9	9.8	-	-	-
266	KO15112	KOLDA	2015	Uncomplicated Malaria	8	F	SURVIVOR	0	48380	-	14.4	43.5	79.2	26.2	33.1	10.3	5.48	59	60.1	28.1	-	-	-
267	TA15002	TAMABACOUNDA	2015	Uncomplicated Malaria	37	F	SURVIVOR	0	4000	-	12.1	38.6	-	-	-	4.1	4.34	35	-	-	-	-	-
268	TA15005	TAMABACOUNDA	2015	Uncomplicated Malaria	38	F	SURVIVOR	0	8695	-	10.4	32	-	-	-	2.59	3.65	158	-	-	-	-	-
269	TA15008	TAMABACOUNDA	2015	Uncomplicated Malaria	1	M	SURVIVOR	0	120	-	7.9	13.3	-	-	-	5.5	1.3	469	-	-	-	-	-
270	TA15010	TAMABACOUNDA	2015	Uncomplicated Malaria	68	M	SURVIVOR	0	6486	-	8	27.8	-	-	-	4.06	4.29	108	-	-	-	-	-
271	TA15014	TAMABACOUNDA	2015	Uncomplicated Malaria	6	F	SURVIVOR	0	-	-	4.5	11.8	-	-	-	15.9	1.5	173	-	-	-	-	-
272	TA15015	TAMABACOUNDA	2015	Uncomplicated Malaria	-	F	SURVIVOR	0	2688	-	9.7	29.8	-	-	-	12	3.56	280	-	-	-	-	-
273	TA15018	TAMABACOUNDA	2015	Uncomplicated Malaria	0	F	SURVIVOR	0	200	-	11.8	36	-	-	-	6	3.51	206	-	-	-	-	-
274	TA15021	TAMABACOUNDA	2015	Uncomplicated Malaria	0	F	SURVIVOR	0	1019	-	12.6	38.6	-	-	-	3.5	3.27	26	-	-	-	-	-
275	TA15022	TAMABACOUNDA	2015	Uncomplicated Malaria	58	F	SURVIVOR	0	120	-	12.8	39.9	-	-	-	14.11	4.56	301	-	-	-	-	-
276	TA15028	TAMABACOUNDA	2015	Uncomplicated Malaria	0	F	SURVIVOR	0	1820	-	12.4	37.5	-	-	-	3.55	4.08	113	-	-	-	-	-
277	TA15029	TAMABACOUNDA	2015	Uncomplicated Malaria	0	F	SURVIVOR	0	8815	-	12.1	18.6	-	-	-	3.2	4.8	54	-	-	-	-	-
278	TA15030	TAMABACOUNDA	2015	Uncomplicated Malaria	25	F	SURVIVOR	0	9006	-	12.6	39.4	-	-	-	6.3	4.24	169	-	-	-	-	-
279	TA15032	TAMABACOUNDA	2015	Uncomplicated Malaria	57	M	SURVIVOR	0	13700	-	10.5	33.5	-	-	-	3.11	4.05	200	-	-	-	-	-
280	TA15033	TAMABACOUNDA	2015	Uncomplicated Malaria	40	M	SURVIVOR	0	699	-	5.6	17.6	-	-	-	8.7	1.97	197	-	-	-	-	-
281	TA15036	TAMABACOUNDA	2015	Uncomplicated Malaria	53	F	SURVIVOR	0	16648	-	10.7	30	-	-	-	5.63	3.5	27	-	-	-	-	-
282	TA15037	TAMABACOUNDA	2015	Uncomplicated Malaria	8	M	SURVIVOR	0	-	-	6.7	21.7	-	-	-	8	1.9	461	-	-	-	-	-
283	TA15039	TAMABACOUNDA	2015	Uncomplicated Malaria	10	F	SURVIVOR	0	25504	-	9.6	27	-	-	-	10	3.31	212	-	-	-	-	-
284	TA15043	TAMABACOUNDA	2015	Uncomplicated Malaria	65	M	SURVIVOR	0	-	-	10.1	29.3	-	-	-	1.7	3.28	58	-	-	-	-	-
285	TA15047	TAMABACOUNDA	2015	Uncomplicated Malaria	23	M	SURVIVOR	0	-	-	12	35.2	-	-	-	5.3	3.68	162	-	-	-	-	-
286	TA15050	TAMABACOUNDA	2015	Uncomplicated Malaria	3	F	SURVIVOR	0	60000	-	5.6	19.7	-	-	-	7	3.24	406	-	-	-	-	-
287	TA15057	TAMABACOUNDA	2015	Uncomplicated Malaria	84	M	SURVIVOR	0	-	-	13.4	39.1	-	-	-	13.9	4.15	129	-	-	-	-	-
288	TA15058	TAMABACOUNDA	2015	Uncomplicated Malaria	4	F	SURVIVOR	0	143	-	4.7	13.7	-	-	-	20.8	1.7	345	-	-	-	-	-
289	TA15061	TAMABACOUNDA	2015	Uncomplicated Malaria	79	M	SURVIVOR	0	4240	-	11.6	32.6	-	-	-	2.9	3.63	216	-	-	-	-	-
290	TA15064	TAMABACOUNDA	2015	Uncomplicated Malaria	14	M	SURVIVOR	0	7058	-	13.1	39	-	-	-	4.8	4.52	184	-	-	-	-	-
291	TA15065	TAMABACOUNDA	2015	Uncomplicated Malaria	28	F	SURVIVOR	0	-	-	10.5	31.3	-	-	-	7.4	3.57	234	-	-	-	-	-
292	TA15067	TAMABACOUNDA	2015	Uncomplicated Malaria	57	M	SURVIVOR	0	620	-	8.2	23.6	-	-	-	5.4	2.89	229	-	-	-	-	-
293	TA15068	TAMABACOUNDA	2015	Uncomplicated Malaria	38	F	SURVIVOR	0	-	-	12.8	36.7	-	-	-	7.8	4.1	236	-	-	-	-	-
294	TA15070	TAMABACOUNDA	2015	Uncomplicated Malaria	-	F	SURVIVOR	0	363	-	8.7	25.4	-	-	-	10.3	3.22	508	-	-	-	-	-
295	TA15071	TAMABACOUNDA	2015	Uncomplicated Malaria	2.5	M	SURVIVOR	0	-	-	10	29.9	-	-	-	4.5	4.32	654	-	-	-	-	-
296	TA15076	TAMABACOUNDA	2015	Uncomplicated Malaria	23	F	SURVIVOR	0	4019	-	12	34.1	-	-	-	4.7	3.97	177	-	-	-	-	-
297	TA15077	TAMABACOUNDA	2015	Uncomplicated Malaria	45	M	SURVIVOR	0	6545	-	13.2	36.7	-	-	-	5.4	3.99	240	-	-	-	-	-
298	TA15078	TAMABACOUNDA	2015	Uncomplicated Malaria	32	M	SURVIVOR	0	-	-	14.4	40.5	-	-	-	11	4.34	182	-	-	-	-	-
1	TM14001	DAKAR	2014	CTR	25	M	SURVIVOR	0	0	O+	16.5	48.8	89	30	33.8	5.9	5.5	180	31.8	61.2	5.2	1.6	0.2
2	TM14002	DAKAR	2014	CTR	26	F	SURVIVOR	0	0	O+	11.8	37.2	78	24.7	31.7	4.4	4.77	194	31.5	53.1	10	4.6	0.8
3	TM14003	DAKAR	2014	CTR	25	F	SURVIVOR	0	0	B+	13.7	41.3	86	28.4	33.2	3.9	4.83	277	52.8	32.5	7.2	6.8	0.7
4	TM14004	DAKAR	2014	CTR	27	F	SURVIVOR	0	0	B+	12.2	36.4	83	27.7	33.5	3.6	4.41	242	31.8	51.8	12.6	3.5	0.3
5	TM14005	DAKAR	2014	CTR	23	M	SURVIVOR	0	0	A+	15	45.7	87	28.5	32.8	5.1	5.27	258	40	49.9	7.9	1	1.2
6	TM14006	DAKAR	2014	CTR	24	F	SURVIVOR	0	0	-	12	37.4	80	25.7	32.1	5	4.67	324	51.9	37.6	7.8	2.6	0.1
7	TM14007	DAKAR	2014	CTR	25	F	SURVIVOR	0	0	-	12.1	36.6	88	29	33.1	3.8	4.17	220	39.6	47.9	8.2	3.5	0.8
8	TM14008	DAKAR	2014	CTR	26	F	SURVIVOR	0	0	-	13.4	39.7	84	28.2	33.8	5.6	4.75	313	33	55.9	7.5	3.4	0.2
9	TM14009	DAKAR	2014	CTR	41	F	SURVIVOR	0	0	-	14.3	42.8	83	27.7	33.4	3.5	5.16	205	34.2	56.2	7.7	1.1	0.8
10	TM14010	DAKAR	2014	CTR	53	M	SURVIVOR	0	0	AB+	14.6	44.1	93	30.7	33.1	4.3	4.75	201	32.6	48.9	8.4	9	1.1
11	TM14011	DAKAR	2014	CTR	24	F	SURVIVOR	0	0	-	11.8	36.1	83	27.1	32.7	5.5	4.35	258	49.5	40.2	7.7	1.1	1.5
12	TM14012	DAKAR	2014	CTR	39	F	SURVIVOR	0	0	-	16.1	47.7	92	31	33.8	8.7	5.19	266	46.3	37.2	14	1.9	0.6
13	TM14013	DAKAR	2014	CTR	61	M	SURVIVOR	0	0	-	12.7	38.6	88	29.1	32.9	7.6	4.37	388	60.5	27.6	7.8	2.2	1.9
14	TM13001	DAKAR	2013	CTR	39	M	SURVIVOR	0	0	A +	13.5	39.2	85	29.3	34.4	5.1	4.6	257	38.8	37.8	7.4	14.4	1.6
15	TM13002	DAKAR	2013	CTR	29	M	SURVIVOR	0	0	A +	15.6	46.7	85	28.5	33.4	3.7	5.48	218	47.8	44.4	6.1	1	0.7
16	TM13004	DAKAR	2013	CTR	26	F	SURVIVOR	0	0	A +	13.7	40.6	84	28.4	33.7	4.3	4.82	211	47.1	39.4	10.6	1.7	1.2
17	TM13005	DAKAR	2013	CTR	26	F	SURVIVOR	0	0	O +	12.7	36.5	81	28.3	34.8	4.4	4.48	282	49.3	45.2	4.7	0.5	0.3
18	TM13006	DAKAR	2013	CTR	29	M	SURVIVOR	0	0	O +		46.3	88	29.8	33.9	5.3	5.27	277	46.6	39.3	6.1	6.3	1.5
19	TM13007	DAKAR	2013	CTR	23	F	SURVIVOR	0	0	O +	13	38.9	79	26.5	33.4	3.8	4.9	321	44	45.2	6.4	3.3	1.1
20	TM13008	DAKAR	2013	CTR	30	M	SURVIVOR	0	0	A +	15.3	45.4	79	26.5	33.7	4.7	5.78	253	43.8	47	2	6.9	0.2
21	TM13009	DAKAR	2013	CTR	27	M	SURVIVOR	0	0	-	14.7	42.7	90	31.1	34.4	6.1	4.72	312	31	52	3.3	13.6	0.1
22	TM13010	DAKAR	2013	CTR	24	F	SURVIVOR	0	0	O +	11.3	33.6	81	27.2	33.6	7.2	4.16	219	62.6	21	12.3	2.7	1.4
23	TM13011	DAKAR	2013	CTR	29	F	SURVIVOR	0	0	-	-	-	-	-	-	8.8	-	-	-	-	-	-	-
24	TM13014	DAKAR	2013	CTR	28	M	SURVIVOR	0	0	O +	14.9	43.8	85	28.8	34	5.4	5.17	314	35.4	43.9	7.6	11.2	1.9
25	TM13015	DAKAR	2013	CTR	48	F	SURVIVOR	0	0	B +	13.4	38.9	84	29	34.4	8.4	4.62	319	53.3	27.7	8.7	9.4	0.9
26	TM13016	DAKAR	2013	CTR	57	M	SURVIVOR	0	0	-	14	42	78	26.1	33.3	4.3	5.36	202	34.2	58.5	4.3	2.9	0.1
27	TM13017	DAKAR	2013	CTR	27	M	SURVIVOR	0	0	O +	14.9	44.2	81	27.1	33.7	5.7	5.49	215	34.7	46.8	5.1	12.8	0.6
28	TM13018	DAKAR	2013	CTR	29	M	SURVIVOR	0	0	-	16.5	48.3	87	29.8	34.2	5.1	5.54	287	34.1	52.5	6.8	5.4	1.2
29	CTR13007	DAKAR	2013	CTR	84	M	SURVIVOR	0	0	-	14.2	42.5	83	27.6	33.4	6.8	5.14	218	39.9	45.5	8.4	5	1.2
30	CTR13008	DAKAR	2013	CTR	38	F	SURVIVOR	0	0	-	10.4	30.9	76	25.5	33.7	-	-	554	52.6	34.5	9.1	2.7	1.1
31	CTR13009	DAKAR	2013	CTR	41	M	SURVIVOR	0	0	-	12.3	36.6	84	28.3	33.6	5.7	4.34	298	76.8	10.5	9.7	1.5	1.5
32	CTR13010	DAKAR	2013	CTR	6	F	SURVIVOR	0	0	-	13.2	37.8	84	29.3	34.9	8.2	4.5	291	74.6	9.1	14.6	0.3	1.4
33	CTR13011	DAKAR	2013	CTR	24	M	SURVIVOR	0	0	-	-	-	-	-	-	-	-	-	-	-	-	-	-
34	CTR13012	DAKAR	2013	CTR	45	M	SURVIVOR	0	0	-	-	-	-	-	-	-	-	-	-	-	-	-	-
35	CTR13013	DAKAR	2013	CTR	59	F	SURVIVOR	0	0	-	-	-	-	-	-	-	-	-	-	-	-	-	-
36	CTR13014	DAKAR	2013	CTR	32	F	SURVIVOR	0	0	-	11.9	35.4	91	30.5	33.6	-	-	193	57.2	32.6	7.7	1.3	1.2
37	CTR13015	DAKAR	2013	CTR	16	F	SURVIVOR	0	0	-	11.2	33.6	71	23.6	33.3	7.2	4.74	342	47.1	44.3	7.3	1.1	0.2
38	CTR13016	DAKAR	2013	CTR	65	F	SURVIVOR	0	0	-	12	36.3	86	28.4	33.1	6.6	4.22	415	49.9	39.5	8.3	1.6	0.7
39	CTR13017	DAKAR	2013	CTR	89	F	SURVIVOR	0	0	-	16	47.5	95	32.1	33.7	4.7	4.99	305	49.6	43.7	5.5	0.5	0.7
40	CTR13018	DAKAR	2013	CTR	5	F	SURVIVOR	0	0	-	8.9	26.5	83	27.9	33.6	17	3.19	684	63	28	8.2	0.3	0.5
41	CTR13019	DAKAR	2013	CTR	72	F	SURVIVOR	0	0	-	14.1	41.5	78	26.4	34	6.1	5.35	208	43.6	48.3	6.8	0.7	0.6
42	CTR13020	DAKAR	2013	CTR	2	M	SURVIVOR	0	0	O+	10.9	31.9	73	24.8	34.2	9.1	4.4	493	43.3	41.3	12.3	2	1
43	CTR13021	DAKAR	2013	CTR	-	-	SURVIVOR	0	0	-
44	CTR13022	DAKAR	2013	CTR	42	M	SURVIVOR	0	0	-	15	44	95	32.4	34.1	7	4.63	278	42	43.6	6.8	4.3	3.3
45	CTR13023	DAKAR	2013	CTR	64	M	SURVIVOR	0	0	-	13.7	40.3	89	30.3	34	10.1	4.52	294	74.3	14.2	10.6	0.6	0.3
46	CTR13024	DAKAR	2013	CTR	60	M	SURVIVOR	0	0	-	-	-	-	-	-	-	-	-	-	-	-	-	-
47	CTR13025	DAKAR	2013	CTR	42	M	SURVIVOR	0	0	-	14.5	42.8	89	30.1	33.9	4.3	4.81	254	35.1	45.8	10.3	5.9	2.6
48	CTR13026	DAKAR	2013	CTR	34	F	SURVIVOR	0	0	-	13.7	41.2	80	26.4	33.3	4.9	5.18	238	61.2	27.9	9.4	0.5	1
49	CTR13027	DAKAR	2013	CTR	28	F	SURVIVOR	0	0	-	-	-	-	-	-	-	-	-	-	-	-	-	-
50	CTR13028	DAKAR	2013	CTR	2	M	SURVIVOR	0	0	-	10.9	32.3	65	21.9	33.7	7.9	4.98	375	47.9	39.4	9.5	2	1.2
51	CTR13029	DAKAR	2013	CTR	80	M	SURVIVOR	0	0	-	8.6	25.5	87	29.5	33.7	7.2	2.92	185	58.6	29.3	2.9	8.4	0.8
52	CTR13030	DAKAR	2013	CTR	9	F	SURVIVOR	0	0	A +	12.1	34.9	84	29	34.7	5.1	4.17	283	35.6	40.5	16.6	5	2.3
53	CTR13032	DAKAR	2013	CTR	34	F	SURVIVOR	0	0	-	11.9	34.8	89	30.5	34.2	5	3.9	232	28.4	56.4	7.9	5.7	2.6
54	CTR13033	DAKAR	2013	CTR	44	F	SURVIVOR	0	0	-	11	32.8	85	28.4	33.5	7.6	3.87	290	55	33	6.9	4.3	0.8
55	CTR13034	DAKAR	2013	CTR	16	F	SURVIVOR	0	0	-	-	-	-	-	-	-	-	-	-	-	-	-	-
56	CTR13035	DAKAR	2013	CTR	28	F	SURVIVOR	0	0	-	11.2	33.1	86	28.9	33.8	7.4	3.87	339	45.9	40.4	8.4	3.8	1.5
57	CTR13036	DAKAR	2013	CTR	6	M	SURVIVOR	0	0	-	12.8	38	79	26.7	33.7	5.2	4.79	329	14.7	76.9	7.1	0.6	0.7
58	CTR13037	DAKAR	2013	CTR	12	M	SURVIVOR	0	0	-	-	-	-	-	-	-	-	-	-	-	-	-	-
59	CTR13039	DAKAR	2013	CTR	50	F	SURVIVOR	0	0	-	10.9	32.6	87	29.1	33.4	6.4	3.74	290	42.3	46.7	8.9	1	1.1
60	CTR13040	DAKAR	2013	CTR	62	M	SURVIVOR	0	0	-	-	-	-	-	-	-	-	-	-	-	-	-	-
61	CTR13041	DAKAR	2013	CTR	55	M	SURVIVOR	0	0	-	14.6	43.2	84	28.3	33.8	6.9	5.16	221	64.2	17.5	12.5	3.7	2.1
62	CTR13042	DAKAR	2013	CTR	28	F	SURVIVOR	0	0	-	12	34.9	87	30.1	34.4	4.8	3.99	268	40.9	45.7	8	5.3	0.1
63	CTR13044	DAKAR	2013	CTR	3	M	SURVIVOR	0	0	A +	11.8	35.1	72	24.3	33.6	5	4.85	518	32	64.1	0.5	2.5	0.9
64	CTR13045	DAKAR	2013	CTR	76	M	SURVIVOR	0	0	-	15.4	44.6	86	29.6	34.5	4.6	5.21	210	31.9	55	5.4	7.4	0.3
65	CTR13046	DAKAR	2013	CTR	3	M	SURVIVOR	0	0	-	10.4	32	67	21.6	32.5	6	4.81	584	39.6	49.5	8	0.7	2.2
66	CTR13048	DAKAR	2013	CTR	52	F	SURVIVOR	0	0	-	11	32.8	79	26.4	33.5	3.1	4.17	142	38.8	44.7	15.8	0.2	0.5
67	CTR13049	DAKAR	2013	CTR	83	F	SURVIVOR	0	0	-	12	34.3	93	32.4	35	5	3.7	237	50.9	34.5	9.9	4.2	0.5
68	CTR13050	DAKAR	2013	CTR	37	F	SURVIVOR	0	0	-	11.6	33.9	78	26.9	34.2	7.1	4.32	191	64.6	24.5	7.5	2.2	1.2
69	CTR13051	DAKAR	2013	CTR	7	F	SURVIVOR	0	0	A +	10.9	31.8	81	27.6	34.3	4.9	3.95	538	23.5	56.3	12.7	5.2	2.3
70	CTR13052	DAKAR	2013	CTR	63	F	SURVIVOR	0	0	-	-	-	-	-	-	-	-	-	-	-	-	-	-
71	CTR13053	DAKAR	2013	CTR	26	M	SURVIVOR	0	0	-	16.1	48.5	85	28.2	33.2	3.8	5.7	228	25.7	68	0.4	5.5	0.4
72	CTR13054	DAKAR	2013	CTR	61	M	SURVIVOR	0	0	-	12.9	37.8	75	25.7	34.1	14.3	5.02	244	75.8	6.6	8.7	8.2	0.7
73	CTR13055	DAKAR	2013	CTR	51	M	SURVIVOR	0	0	-	14	41.1	82	27.9	34.1	4.3	5.01	234	41.1	47.5	8.1	1.9	1.4
74	CTR13057	DAKAR	2013	CTR	42	M	SURVIVOR	0	0	-	16.7	48.9	85	29.2	34.2	6.4	5.72	206	38.3	37.7	17.6	4.3	2.1
75	CTR13058	DAKAR	2013	CTR	58	M	SURVIVOR	0	0	-	15.9	46.5	85	29.2	34.2	4.7	5.45	213	38.2	47.2	7.3	7	0.3
76	CTR13059	DAKAR	2013	CTR	-	-	SURVIVOR	0	0	-	-	-	-	-	-	-	-	-	-	-	-	-	-
77	CTR13061	DAKAR	2013	CTR	2	M	SURVIVOR	0	0	-	-	-	-	-	-	-	-	-	-	-	-	-	-
78	CTR13062	DAKAR	2013	CTR	36	F	SURVIVOR	0	0	-	11.8	37.1	72	22.8	31.8	11.3	5.18	231	71.1	18.4	9.1	1	0.4
79	CTR13063	DAKAR	2013	CTR	63	F	SURVIVOR	0	0	-	8.9	27.3	105	34.1	32.6	2.7	2.61	163	60.4	28.6	9.8	0.6	0.6
80	CTR13065	DAKAR	2013	CTR	32	M	SURVIVOR	0	0	-	14	41.7	80	26.8	33.6	5.5	5.22	245	38.2	46.5	8.3	5.2	1.8
81	CTR13066	DAKAR	2013	CTR	39	M	SURVIVOR	0	0	-	13.4	39.8	80	26.9	33.7	4.9	4.99	198	28.4	53.4	7.1	10.9	0.2
82	CTR13067	DAKAR	2013	CTR	11	F	SURVIVOR	0	0	-	12.3	35.2	85	29.8	34.9	3.6	4.13	275	32.5	50.2	14.6	1.4	1.3
83	CTR13068	DAKAR	2013	CTR	24	F	SURVIVOR	0	0	-	12.6	36.3	83	28.8	34.7	4.8	4.37	227	52.4	28.6	10.3	7.2	1.5
84	CTR13069	DAKAR	2013	CTR	21	F	SURVIVOR	0	0	-	13.1	38.9	83	27.9	33.7	7.4	4.7	291	39.7	35.2	9.1	14.7	1.3
85	CTR13070	DAKAR	2013	CTR	36	F	SURVIVOR	0	0	-	13	37.3	83	28.9	34.9	6.4	4.5	410	59.2	28.3	8.7	1.9	1.9
86	CTR13071	DAKAR	2013	CTR	41	F	SURVIVOR	0	0	-	12.5	37.7	76	25.4	33.2	6.3	4.93	287	53.1	28.3	10.9	5.8	1.9
87	CTR13072	DAKAR	2013	CTR	5	M	SURVIVOR	0	0	O+	11.8	33.9	80	27.9	34.8	4.3	4.23	259	31.8	60.9	3.3	2.4	1.6
88	CTR13073	DAKAR	2013	CTR	28	F	SURVIVOR	0	0	-	10.4	31.8	72	23.4	32.7	6.9	4.44	530	52.8	35	8.8	2.2	1.2
89	CTR13074	DAKAR	2013	CTR	28	M	SURVIVOR	0	0	-	15.9	46.5	79	27	34.2	6	5.89	203	38.4	43.8	10.7	3.9	3.2
90	CTR13075	DAKAR	2013	CTR	60	M	SURVIVOR	0	0	-	-	-	-	-	-	-	-	-	-	-	-	-	-
91	CTR13076	DAKAR	2013	CTR	12	F	SURVIVOR	0	0	-	11.5	33.9	74	25.2	33.9	7	4.57	484	42.3	47.1	8.6	1.4	0.6
92	CTR13077	DAKAR	2013	CTR	52	F	SURVIVOR	0	0	-	8.9	26.8	86	28.4	33.2	7.4	3.13	370	69.7	19.9	7.6	2.1	0.7
93	CTR13078	DAKAR	2013	CTR	46	F	SURVIVOR	0	0	-	12.7	36.9	93	31.9	34.4	4.4	3.98	223	47.2	32.4	16.7	1.5	2.2
94	CTR13079	DAKAR	2013	CTR	37	F	SURVIVOR	0	0	-	-	-	-	-	-	-	-	-	-	-	-	-	-
95	CTR13080	DAKAR	2013	CTR	59	M	SURVIVOR	0	0	-	14.6	42.1	86	29.9	34.7	7.3	4.89	261	46.3	32.5	11.8	7.3	2.1
96	CTR13081	DAKAR	2013	CTR	23	F	SURVIVOR	0	0	-	11.4	33	80	27.5	34.5	4.6	4.14	336	39	42.2	11.6	5	2.2
97	CTR13082	DAKAR	2013	CTR	44	M	SURVIVOR	0	0	-	14.8	43.2	81	27.8	34.3	5.7	5.32	238	41.7	42.3	11.9	2.7	1.4
98	CTR13083	DAKAR	2013	CTR	34	F	SURVIVOR	0	0	-	11.3	33.4	85	28.9	33.8	6.7	3.91	264	32.8	30	6.1	30.2	0.9
99	CTR13084	DAKAR	2013	CTR	14	M	SURVIVOR	0	0	O+	10.7	30.9	79	27.5	34.6	7.3	3.89	169	53.4	35.4	7.6	2.5	1.1
100	CTR13085	DAKAR	2013	CTR	625	F	SURVIVOR	0	0	-	10.9	32.9	78	26	33.1	8.5	4.2	446	51.7	36.9	6.7	3.8	0.9
101	CTR13086	DAKAR	2013	CTR	46	F	SURVIVOR	0	0	-	13.8	40	88	30.2	34.5	5.9	4.57	438	57.6	31.4	5.9	3.9	1.2
102	CTR13087	DAKAR	2013	CTR	29	F	SURVIVOR	0	0	-	13.5	37.8	87	31	35.7	6.2	4.36	266	49.5	40.3	7.1	1.6	1.5
103	CTR13088	DAKAR	2013	CTR	42	M	SURVIVOR	0	0	-	15.7	46.1	83	28.4	34.1	4.6	5.53	192	43.3	41.1	8.3	6.1	1.2
104	CTR13089	DAKAR	2013	CTR	40	F	SURVIVOR	0	0	-	13.5	39.3	89	30.7	34.4	7.1	4.4	314	51.3	36.5	10.7	0.9	0.6
105	CTR13090	DAKAR	2013	CTR	46	M	SURVIVOR	0	0	-	13.7	39.8	85	29.3	34.4	4.9	4.68	181	43.3	44.1	6.6	5.7	0.3
106	CTR13091	DAKAR	2013	CTR	8	F	SURVIVOR	0	0	-	13.6	39.6	79	27	34.3	6.4	5.04	198	53	27.4	17.2	1.7	0.7
107	CTR13092	DAKAR	2013	CTR	21	F	SURVIVOR	0	0	O+	11.7	34.4	86	29.1	34	8.9	4.02	208	64.8	22.5	6.7	4.8	1.2
108	CTR13093	DAKAR	2013	CTR	4	M	SURVIVOR	0	0	B +	11.6	34.4	76	25.5	33.7	8.5	4.55	352	57.8	17.8	20.1	0.3	4
109	CTR13094	DAKAR	2013	CTR	41	M	SURVIVOR	0	0	-	15.5	46	80	26.8	33.7	5.9	5.78	214	37.2	50.2	7.4	3.6	1.6
110	CTR13097	DAKAR	2013	CTR	11	F	SURVIVOR	0	0	-	12.3	35.2	85	29.8	34.9	3.6	4.13	275	32.5	50.2	14.6	1.4	1.3
111	CTR13098	DAKAR	2013	CTR	24	F	SURVIVOR	0	0	-	12.6	36.3	83	28.8	34.7	4.8	4.37	227	52.4	28.6	10.3	7.2	1.5
112	CTR13099	DAKAR	2013	CTR	21	F	SURVIVOR	0	0	-	13.1	38.9	83	27.9	33.7	7.4	4.7	291	39.7	35.2	9.1	14.7	1.3
113	CTR13100	DAKAR	2013	CTR	36	F	SURVIVOR	0	0	-	13	37.3	83	28.9	34.9	6.4	4.5	410	59.2	28.3	8.7	1.9	1.9
114	CTR13101	DAKAR	2013	CTR	41	F	SURVIVOR	0	0	-	12.5	37.7	76	25.4	33.2	6.3	4.93	287	53.1	28.3	10.9	5.8	1.9
115	CTR13102	DAKAR	2013	CTR	5	M	SURVIVOR	0	0	O+	11.8	33.9	80	27.9	34.8	4.3	4.23	259	31.8	60.9	3.3	2.4	1.6
116	CTR13103	DAKAR	2013	CTR	28	F	SURVIVOR	0	0	-	10.4	31.8	72	23.4	32.7	6.9	4.44	530	52.8	35	8.8	2.2	1.2
117	CTR13104	DAKAR	2013	CTR	28	M	SURVIVOR	0	0	-	15.9	46.5	79	27	34.2	6	5.89	203	38.4	43.8	10.7	3.9	3.2
118	CTR13105	DAKAR	2013	CTR	60	M	SURVIVOR	0	0	-	-	-	-	-	-	-	-	-	-	-	-	-	-
119	CTR13106	DAKAR	2013	CTR	12	F	SURVIVOR	0	0	-	11.5	33.9	74	25.2	33.9	7	4.57	484	42.3	47.1	8.6	1.4	0.6
120	CTR13107	DAKAR	2013	CTR	52	F	SURVIVOR	0	0	-	8.9	26.8	86	28.4	33.2	7.4	3.13	370	69.7	19.9	7.6	2.1	0.7
121	CTR13108	DAKAR	2013	CTR	46	F	SURVIVOR	0	0	-	12.7	36.9	93	31.9	34.4	4.4	3.98	223	47.2	32.4	16.7	1.5	2.2
122	CTR13109	DAKAR	2013	CTR	37	F	SURVIVOR	0	0	-	-	-	-	-	-	-	-	-	-	-	-	-	-
123	CTR13110	DAKAR	2013	CTR	59	M	SURVIVOR	0	0	-	14.6	42.1	86	29.9	34.7	7.3	4.89	261	46.3	32.5	11.8	7.3	2.1
124	CTR13111	DAKAR	2013	CTR	23	F	SURVIVOR	0	0	-	11.4	33	80	27.5	34.5	4.6	4.14	336	39	42.2	11.6	5	2.2
125	CTR13112	DAKAR	2013	CTR	44	M	SURVIVOR	0	0	-	14.8	43.2	81	27.8	34.3	5.7	5.32	238	41.7	42.3	11.9	2.7	1.4
126	CTR13113	DAKAR	2013	CTR	34	F	SURVIVOR	0	0	-	11.3	33.4	85	28.9	33.8	6.7	3.91	264	32.8	30	6.1	30.2	0.9
127	CTR13114	DAKAR	2013	CTR	14	M	SURVIVOR	0	0	O+	10.7	30.9	79	27.5	34.6	7.3	3.89	169	53.4	35.4	7.6	2.5	1.1
128	CTR13115	DAKAR	2013	CTR	625	F	SURVIVOR	0	0	-	10.9	32.9	78	26	33.1	8.5	4.2	446	51.7	36.9	6.7	3.8	0.9
129	CTR13116	DAKAR	2013	CTR	46	F	SURVIVOR	0	0	-	13.8	40	88	30.2	34.5	5.9	4.57	438	57.6	31.4	5.9	3.9	1.2
130	CTR13117	DAKAR	2013	CTR	29	F	SURVIVOR	0	0	-	13.5	37.8	87	31	35.7	6.2	4.36	266	49.5	40.3	7.1	1.6	1.5
131	CTR13118	DAKAR	2013	CTR	42	M	SURVIVOR	0	0	-	15.7	46.1	83	28.4	34.1	4.6	5.53	192	43.3	41.1	8.3	6.1	1.2
132	CTR13119	DAKAR	2013	CTR	40	F	SURVIVOR	0	0	-	13.5	39.3	89	30.7	34.4	7.1	4.4	314	51.3	36.5	10.7	0.9	0.6
133	CTR13120	DAKAR	2013	CTR	46	M	SURVIVOR	0	0	-	13.7	39.8	85	29.3	34.4	4.9	4.68	181	43.3	44.1	6.6	5.7	0.3
134	CTR13121	DAKAR	2013	CTR	8	F	SURVIVOR	0	0	-	13.6	39.6	79	27	34.3	6.4	5.04	198	53	27.4	17.2	1.7	0.7
135	CTR13122	DAKAR	2013	CTR	21	F	SURVIVOR	0	0	O+	11.7	34.4	86	29.1	34	8.9	4.02	208	64.8	22.5	6.7	4.8	1.2
136	CTR13123	DAKAR	2013	CTR	4	M	SURVIVOR	0	0	B +	11.6	34.4	76	25.5	33.7	8.5	4.55	352	57.8	17.8	20.1	0.3	4
137	CTR13124	DAKAR	2013	CTR	41	M	SURVIVOR	0	0	-	15.5	46	80	26.8	33.7	5.9	5.78	214	37.2	50.2	7.4	3.6	1.6
138	CTR13125	DAKAR	2013	CTR	18	F	SURVIVOR	0	0	-	13	38	84	28.8	34.2	6.8	4.51	224	59.1	26.7	10.5	1.2	2.5
139	CTR13126	DAKAR	2013	CTR	28	F	SURVIVOR	0	0	-	13.4	39.5	95	32.2	33.9	6.2	4.16	314	50.8	38.6	6.6	2	2
140	CTR13127	DAKAR	2013	CTR	1	F	SURVIVOR	0	0	-	10.5	31.2	73	24.5	33.7	12.5	4.29	541	41.1	36.4	11.3	8.6	2.6
141	CTR13128	DAKAR	2013	CTR	5	M	SURVIVOR	0	0	-	11.3	34	69	22.8	33.2	8.4	4.95	549	65.4	24.2	8.7	0.5	1.2
142	CTR13129	DAKAR	2013	CTR	38	M	SURVIVOR	0	0	-	14	42.4	73	24.1	33	3.4	5.8	227	44	40	11.3	2.6	2.1
143	CTR13130	DAKAR	2013	CTR	20	F	SURVIVOR	0	0	-	13.1	38.8	84	28.3	33.8	5.3	4.63	268	36.7	48.3	8.9	4.4	1.7
144	CTR13131	DAKAR	2013	CTR	51	F	SURVIVOR	0	0	-	11.9	36.9	78	25.1	32.2	6.3	4.75	376	37.6	52.3	7.3	1.6	1.2
145	CTR13132	DAKAR	2013	CTR	53	F	SURVIVOR	0	0	-	10.8	31.4	85	29.3	34.4	7	3.68	258	68.2	19.9	8.5	2.6	0.8
146	CTR13133	DAKAR	2013	CTR	6	M	SURVIVOR	0	0	-	11.3	33.5	83	27.9	33.7	6	4.05	313	50.5	30.7	15.1	2.4	1.3
147	CTR13134	DAKAR	2013	CTR	2	M	SURVIVOR	0	0	-	10.9	31	78	27.5	35.2	9.5	3.97	463	23	58.5	10.6	6.6	1.3
148	CTR13135	DAKAR	2013	CTR	2	M	SURVIVOR	0	0	-	-	-	-	-	-	-	-	-	-	-	-	-	-
149	CTR13136	DAKAR	2013	CTR	2	F	SURVIVOR	0	0	A+	12.5	36.9	76	25.9	33.9	8.9	4.83	369	23.7	63.3	7	4.1	1.9
150	CTR13137	DAKAR	2013	CTR	32	F	SURVIVOR	0	0	O+	11.5	33.7	79	27.1	34.1	9.3	4.24	256	64.5	24.3	8.5	2.1	0.6
151	CTR13138	DAKAR	2013	CTR	32	M	SURVIVOR	0	0	-	12.6	36.8	93	31.9	34.2	4.7	3.95	281	31.2	53.1	8.2	6.7	0.8
152	CTR13139	DAKAR	2013	CTR	59	M	SURVIVOR	0	0	-	6	17.2	96	33.3	34.9	2.9	1.8	59	16.6	78	3	1.6	0.8
153	CTR13140	DAKAR	2013	CTR	1	F	SURVIVOR	0	0	-	-	-	-	-	-	-	-	-	-	-	-	-	-
154	CTR13141	DAKAR	2013	CTR	4	F	SURVIVOR	0	0	-	11.3	33	83	28.5	34.2	4.2	3.96	219	39.5	47.6	10.9	0.6	1.4
155	CTR13142	DAKAR	2013	CTR	39	M	SURVIVOR	0	0	-	13.9	41.1	86	29.2	33.8	4	4.76	185	51.3	37.5	8.9	1.6	0.7
156	CTR13144	DAKAR	2013	CTR	32	F	SURVIVOR	0	0	-	12.6	363	80	27.9	34.7	3.5	4.52	236	51.1	30.6	15	1.2	2.1
157	CTR13146	DAKAR	2013	CTR	54	M	SURVIVOR	0	0	-	11.9	34.9	82	28.1	34.1	6.4	4.24	404	40.3	44.9	12.8	1.1	0.9
158	CTR13148	DAKAR	2013	CTR	58	M	SURVIVOR	0	0	-	14.8	43.1	86	29.4	34.3	4.9	5.04	212	32.6	46.5	9.2	10.5	1.2
159	CTR13149	DAKAR	2013	CTR	25	M	SURVIVOR	0	0	-	15.3	45.1	89	30.4	33.9	8	5.04	299	56.7	26	9.2	7	1.1
160	CTR13150	DAKAR	2013	CTR	30	F	SURVIVOR	0	0	-	12.6	38.1	79	26	33.1	7.8	4.84	317	53	37.8	7.3	1.2	0.7
161	CTR13151	DAKAR	2013	CTR	15	F	SURVIVOR	0	0	-	12.1	35.2	85	29.1	34.4	4.8	4.16	298	34.8	44.6	9	9.6	2
162	CTR13152	DAKAR	2013	CTR	4	F	SURVIVOR	0	0	-	-	-	-	-	-	-	-	-	-	-	-	-	-
163	CTR13153	DAKAR	2013	CTR	38	M	SURVIVOR	0	0	-	14.6	42.9	84	28.5	34	6.1	5.12	417	66	18.3	13	1.6	1.1
164	CTR13154	DAKAR	2013	CTR	63	M	SURVIVOR	0	0	-	13.6	39.8	91	31.1	34.2	2.8	4.38	178	20.3	58.5	19.3	1.2	0.7
165	CTR13155	DAKAR	2013	CTR	61	F	SURVIVOR	0	0	-	12.1	35.1	91	31.4	34.5	3.2	3.85	264	49.6	34.6	13.4	1.4	1
166	CTR13156	DAKAR	2013	CTR	63	M	SURVIVOR	0	0	-	16	48.4	86	28.3	33.1	5.9	5.66	232	38.2	53.2	6.6	1.4	0.6
167	CTR13157	DAKAR	2013	CTR	41	F	SURVIVOR	0	0	A+	12.1	35.4	82	27.9	34.2	9.3	4.33	348	52.9	36.6	7.9	2.4	0.2
168	CTR13158	DAKAR	2013	CTR	28	M	SURVIVOR	0	0	-	7.5	24.9	57	17.2	30.1	8.8	4.37	643	50.3	36.6	10.4	2	0.7
169	CTR13159	DAKAR	2013	CTR	12	F	SURVIVOR	0	0	-	-	-	-	-	-	-	-	-	-	-	-	-	-
170	CTR13160	DAKAR	2013	CTR	62	F	SURVIVOR	0	0	-	13.2	39.2	86	29	33.7	5.9	4.55	290	63.1	30.5	4.3	1.4	0.7
171	CTR13161	DAKAR	2013	CTR	14	M	SURVIVOR	0	0	-	14	40.5	85	29.4	34.6	5.5	4.77	346	39.7	48.4	3.9	6.9	1.1
172	CTR13162	DAKAR	2013	CTR	58	M	SURVIVOR	0	0	-	-	-	-	-	-	-	-	-	-	-	-	-	-
173	CTR13163	DAKAR	2013	CTR	17	F	SURVIVOR	0	0	-	12.7	38	83	27.7	33.4	5.2	4.59	419	43.6	39.1	14.4	2.3	0.6
174	CTR13164	DAKAR	2013	CTR	59	F	SURVIVOR	0	0	-	12.1	36	84	28.1	33.6	5.2	4.3	327	37	55.3	5.9	1.2	0.6
175	CTR13165	DAKAR	2013	CTR	27	F	SURVIVOR	0	0	-	13	39	77	25.6	33.3	5.2	5.07	303	33.6	53	8.2	2.8	1.4
176	CTR13166	DAKAR	2013	CTR	54	F	SURVIVOR	0	0	-	14.7	42.8	84	28.9	34.3	6.8	5.09	240	52.5	35.8	8.4	2.4	0.9
177	CTR13167	DAKAR	2013	CTR	11	M	SURVIVOR	0	0	-	13.9	41.4	83	27.8	33.6	7	5	344	54	32.8	11.8	0.1	1.3
178	CTR13168	DAKAR	2013	CTR	21	F	SURVIVOR	0	0	-	14.6	42.5	85	29.2	34.4	5.4	5	395	43.1	37.9	14.3	3.7	1
179	CTR13169	DAKAR	2013	CTR	49	F	SURVIVOR	0	0	-	12.5	37.4	85	28.3	33.4	4.7	4.42	167	43.1	38.2	10.5	7	1.2
180	CTR13170	DAKAR	2013	CTR	22	F	SURVIVOR	0	0	-	14.1	41.4	91	30.9	34.1	7	4.57	256	64.6	22.9	7.5	3.6	1.4
181	CTR13171	DAKAR	2013	CTR	15	F	SURVIVOR	0	0	-	12.1	37.2	66	21.5	32.5	7.6	5.62	448	35.6	54.8	8	0.9	0.7
182	CTR13172	DAKAR	2013	CTR	55	F	SURVIVOR	0	0	-	13.7	40.2	84	28.5	34.1	11.2	4.81	235	83	10.5	6	0.1	0.4
183	CTR13173	DAKAR	2013	CTR	86	F	SURVIVOR	0	0	-	12.2	36	85	28.7	33.9	6.4	4.25	187	36	50.5	11	1.5	1
184	CTR13174	DAKAR	2013	CTR	2	F	SURVIVOR	0	0	-	10.7	31.5	78	26.4	34	11	4.05	450	35.8	57.8	4.6	1.5	0.3
185	CTR13175	DAKAR	2013	CTR	55	F	SURVIVOR	0	0	-	13.1	38.6	89	30.1	33.9	5.1	4.35	209	53.1	33.2	10.2	2.7	0.8
186	CTR13176	DAKAR	2013	CTR	61	M	SURVIVOR	0	0	-	13.4	40.7	85	28.1	32.9	6.7	4.77	354	60.4	32	5.7	0.8	1.1
187	CTR13177	DAKAR	2013	CTR	47	F	SURVIVOR	0	0	-	-	-	-	-	-	-	-	-	-	-	-	-	-
188	CTR13178	DAKAR	2013	CTR	35	M	SURVIVOR	0	0	-	16	47.5	84	28.2	33.7	5.1	5.67	270	52.9	32.8	11.2	1.9	1.2
189	CTR13179	DAKAR	2013	CTR	23	F	SURVIVOR	0	0	-	13.9	40.9	85	28.8	34	13.5	4.82	332	69.1	24	5.7	0.8	0.4
190	CTR13180	DAKAR	2013	CTR	30	M	SURVIVOR	0	0	-	13.9	40.9	86	29.3	34	4.2	4.75	208	40.2	43.7	8.2	7.2	0.7
191	CTR13181	DAKAR	2013	CTR	58	F	SURVIVOR	0	0	-	13.7	41.5	80	26.6	33	6.7	5.16	179	29.3	56.1	12	1.2	1.4
192	CTR13182	DAKAR	2013	CTR	35	F	SURVIVOR	0	0	-	10.4	30.3	85	29.2	34.3	7.4	3.56	205	52.7	34.9	8.4	3	1
193	CTR13183	DAKAR	2013	CTR	2	F	SURVIVOR	0	0	-	9.2	29.7	59	18.2	31	4.9	5.06	295	14.8	69.3	12.6	0.7	2.6
194	CTR13184	DAKAR	2013	CTR	28	F	SURVIVOR	0	0	-	12.5	36.6	82	28	34.2	4.1	4.47	326	27.8	57.5	8.7	4.2	1.8
195	CTR13185	DAKAR	2013	CTR	1	M	SURVIVOR	0	0	B+	10	28.8	82	28.3	34.7	9.3	3.53	494	23.9	59	12.4	1.6	3.1
196	CTR13186	DAKAR	2013	CTR	1	M	SURVIVOR	0	0	B+	8.5	24.1	86	30.5	35.3	10.2	2.79	575	29.7	52.5	12.6	1.3	3.9
197	CTR13189	DAKAR	2013	CTR	44	M	SURVIVOR	0	0	-	16.4	47.9	80	27.2	34.2	5.7	6.02	181	46.2	31.7	19.1	0.7	2.3
198	CTR13190	DAKAR	2013	CTR	76	M	SURVIVOR	0	0	-	-	-	-	-	-	-	-	-	-	-	-	-	-
199	CTR13191	DAKAR	2013	CTR	44	F	SURVIVOR	0	0	-	10	31.5	66	21	31.7	5.7	4.76	322	45.9	44.7	5.2	2.4	1.8
200	CTR13192	DAKAR	2013	CTR	74	F	SURVIVOR	0	0	-	11	32.1	90	30.7	34.3	5.7	3.58	287	42.1	44.8	7	4.4	1.7
201	CTR13193	DAKAR	2013	CTR	66	F	SURVIVOR	0	0	-	12.2	35.6	78	26.8	34.3	4.5	4.55	271	26.2	55.6	11.7	5.4	1.1
202	CTR13194	DAKAR	2013	CTR	32	M	SURVIVOR	0	0	-	14.8	42.9	85	29.4	34.5	5.8	5.04	149	50.2	29.3	19.1	0.1	1.3
203	CTR13195	DAKAR	2013	CTR	23	M	SURVIVOR	0	0	-	15.6	45.6	85	28.9	34.2	5.8	5.39	210	55.6	32.1	6.4	5.7	0.2
204	CTR13196	DAKAR	2013	CTR	69	F	SURVIVOR	0	0	B+	12.6	37.1	91	31	34	6.6	4.07	266	51.6	34.4	9.3	3.3	1.4
205	CTR13197	DAKAR	2013	CTR	58	M	SURVIVOR	0	0	-	16.4	48.1	89	30.4	34.1	6.9	5.4	269	53.4	36.4	6.6	2	1.6
206	CTR13198	DAKAR	2013	CTR	11	F	SURVIVOR	0	0	O+	14.3	41.3	84	29.1	34.6	6.5	4.92	320	38.2	29.8	7.3	23.4	1.3
207	CTR13199	DAKAR	2013	CTR	26	F	SURVIVOR	0	0	-	10.3	30.5	81	27.2	33.8	4.6	3.78	220	58.1	33.7	6.2	0.9	1.1
208	CTR13200	DAKAR	2013	CTR	26	F	SURVIVOR	0	0	-	-	-	-	-	-	-	-	-	-	-	-	-	-
209	CTR13201	DAKAR	2013	CTR	42	F	SURVIVOR	0	0	-	-	-	-	-	-	-	-	-	-	-	-	-	-
210	CTR13202	DAKAR	2013	CTR	16	M	SURVIVOR	0	0	-	13.2	40	79	26	33	5.2	5.08	324	35.6	57.2	5.9	1	0.3
211	CTR13203	DAKAR	2013	CTR	70	F	SURVIVOR	0	0	-	-	-	-	-	-	-	-	-	-	-	-	-	-
212	CTR13204	DAKAR	2013	CTR	48	M	SURVIVOR	0	0	-	14.1	41.5	85	29	34	5.7	4.86	286	46	23.9	21.3	6.7	2.1
213	CTR13205	DAKAR	2013	CTR	27	F	SURVIVOR	0	0	O+	12.3	35.8	88	30.1	34.4	7.2	4.08	343	75.9	19	3	1.7	0.4
214	CTR13206	DAKAR	2013	CTR	26	F	SURVIVOR	0	0	-	11.9	36.2	74	24.5	32.9	5	4.86	347	35	57	6.5	0.8	0.7
215	CTR13207	DAKAR	2013	CTR	35	F	SURVIVOR	0	0	-	14.1	42.5	90	29.8	33.2	4.5	4.73	245	47.7	34.1	9.2	8.4	0.6
216	CTR13209	DAKAR	2013	CTR	42	M	SURVIVOR	0	0	O+	13.8	40.6	86	29.2	34	4.2	4.73	173	51.8	31.9	10.7	5.3	0.3
217	CTR13210	DAKAR	2013	CTR	66	F	SURVIVOR	0	0	-	11	31.9	98	34	34.5	4.8	3.24	141	62.8	28.1	7.4	1.1	0.6
218	CTR13211	DAKAR	2013	CTR	2	M	SURVIVOR	0	0	-	10.5	31.6	71	23.4	33.2	10.1	4.48	493	33.9	48.2	16	0.4	1.5
219	CTR13212	DAKAR	2013	CTR	48	M	SURVIVOR	0	0	-	13.9	40.8	82	27.9	34.1	6	4.99	339	38.2	37.6	20.5	2	1.7
220	CTR13213	DAKAR	2013	CTR	5	F	SURVIVOR	0	0	-	12.1	35.4	81	27.8	34.2	8.9	4.36	380	67.8	27.9	3.4	0.8	0.1
221	CTR13214	DAKAR	2013	CTR	50	M	SURVIVOR	0	0	-	13.7	39.9	82	28.3	34.3	4	4.84	247	36.7	53.3	7.6	2	0.4
222	CTR13215	DAKAR	2013	CTR	18	M	SURVIVOR	0	0	-	-	-	-	-	-	-	-	-	-	-	-	-	-
223	CTR13216	DAKAR	2013	CTR	32	F	SURVIVOR	0	0	-	10.9	31.6	93	32.2	34.5	10	3.39	488	71.6	17.9	7.1	2.7	0.7
224	CTR13217	DAKAR	2013	CTR	42	F	SURVIVOR	0	0	-	-	-	-	-	-	-	-	-	-	-	-	-	-
225	CTR13218	DAKAR	2013	CTR	42	M	SURVIVOR	0	0	-	11.5	33.4	78	26.9	34.4	4.8	4.27	106	33.3	46.6	14.1	4.8	1.2
226	CTR13219	DAKAR	2013	CTR	5	M	SURVIVOR	0	0	-	10.9	31.7	83	28.6	34.4	8.2	3.81	642	44.2	39.6	10.9	4.4	0.9
227	CTR13220	DAKAR	2013	CTR	38	M	SURVIVOR	0	0	-	14.7	43.1	80	27.4	34.1	4.3	5.37	234	32	57.7	8.8	1.3	0.2
228	CTR13221	DAKAR	2013	CTR	64	M	SURVIVOR	0	0	-	13.7	40.1	88	30	34.2	2.8	4.57	158	32.5	50.9	10.9	5.5	0.2
229	CTR13222	DAKAR	2013	CTR	73	F	SURVIVOR	0	0	-	8.7	26.2	72	23.8	33.2	14.4	3.66	288	81.3	12.1	5.6	0.5	0.5
230	CTR13223	DAKAR	2013	CTR	1	M	SURVIVOR	0	0	-	9	26.4	74	25.4	34.1	14	3.55	520	57	30.2	11	0	1.8
231	CTR13224	DAKAR	2013	CTR	29	F	SURVIVOR	0	0	-	-	-	-	-	-	-	-	-	-	-	-	-	-
232	CTR13225	DAKAR	2013	CTR	4	M	SURVIVOR	0	0	B+	12.4	36.2	76	26.1	34.3	7.2	4.76	556	23.7	61.6	10.6	2.8	1.3
233	CTR13226	DAKAR	2013	CTR	60	F	SURVIVOR	0	0	-	13.5	39.6	87	29.5	34.1	4.1	4.57	175	42.2	35.9	13.7	6.3	1.9
234	CTR13227	DAKAR	2013	CTR	54	M	SURVIVOR	0	0	-	13.8	39.6	79	27.7	34.8	14.6	4.99	224	67.3	13.7	6	12.2	0.8
235	CTR13228	DAKAR	2013	CTR	19	F	SURVIVOR	0	0	-	-	-	-	-	-	-	-	-	-	-	-	-	-
236	CTR13229	DAKAR	2013	CTR	5	M	SURVIVOR	0	0	-	11.1	33	76	25.7	33.6	12.3	4.32	552	61.2	26.2	10.2	0.3	2.1
237	CTR13230	DAKAR	2013	CTR	7	M	SURVIVOR	0	0	-	-	-	-	-	-	-	-	-	-	-	-	-	-
238	CTR13231	DAKAR	2013	CTR	55	M	SURVIVOR	0	0	-	12.5	35.8	80	28	34.9	6.9	4.46	134	56.2	20.9	21.3	0.6	1
239	CTR13233	DAKAR	2013	CTR	33	F	SURVIVOR	0	0	-	11.2	34.8	72	23.2	32.3	7.6	4.82	204	75	17.5	6.8	0	0.7
240	CTR13234	DAKAR	2013	CTR	16	F	SURVIVOR	0	0	AB+	12.4	36.6	81	27.6	33.9	5.8	4.5	270	45.7	40.3	8.3	5.1	0.6
241	CTR13235	DAKAR	2013	CTR	-	F	SURVIVOR	0	0	-	7.8	22.2	86	30.1	35.1	15.2	2.59	147	94.2	5.4	0.3	0.1	0
242	CTR13236	DAKAR	2013	CTR	18	M	SURVIVOR	0	0	-	-	-	-	-	-	-	-	-	-	-	-	-	-
243	CTR13237	DAKAR	2013	CTR	54	F	SURVIVOR	0	0	-	12.9	37.9	85	28.9	34	7.8	4.47	276	52.8	34.7	8.4	2.9	1.2
244	CTR13238	DAKAR	2013	CTR	20	F	SURVIVOR	0	0	-	10.8	32	73	24.5	33.8	4.7	4.41	287	48.6	37.6	9.6	2.8	1.4
245	CTR13239	DAKAR	2013	CTR	79	M	SURVIVOR	0	0	-	10.6	31.4	80	27.1	33.8	6.1	3.91	226	66.9	16.5	12.9	3	0.7
246	CTR13240	DAKAR	2013	CTR	54	F	SURVIVOR	0	0	-	13.5	40.4	81	27.1	33.4	5.5	4.98	475	18.8	32.6	10.6	6.5	1.5
247	CTR13241	DAKAR	2013	CTR	54	M	SURVIVOR	0	0	-	14.8	43.2	92	31.6	34.3	7.5	4.68	228	59.4	29.8	7.4	2	1.4
248	CTR13242	DAKAR	2013	CTR	61	F	SURVIVOR	0	0	-	-	-	-	-	-	-	-	-	-	-	-	-	-
249	CTR13243	DAKAR	2013	CTR	5	M	SURVIVOR	0	0	AB+	12.6	37.4	80	27	33.7	3.8	4.66	243	39.6	41.4	15.9	0.8	2.3
250	CTR13244	DAKAR	2013	CTR	44	M	SURVIVOR	0	0	-	14	42.8	71	23.3	32.7	5.6	6.02	294	48.5	36.1	10.5	4.6	0.3
251	CTR13245	DAKAR	2013	CTR	-	M	SURVIVOR	0	0	-	13	37.9	81	27.8	34.3	7	4.67	59	77.4	14.7	6.9	0.5	0.5
252	CTR13246	DAKAR	2013	CTR	3	M	SURVIVOR	0	0	-	11.9	35	68	23.2	37	7.9	5.12	418	17.2	71.3	3.9	7	0.6
253	CTR13247	DAKAR	2013	CTR	53	M	SURVIVOR	0	0	-	15.3	43.2	90	32	35.4	5.3	4.78	274	47.5	37.2	8.5	5.6	1.2
254	CTR13249	DAKAR	2013	CTR	65	M	SURVIVOR	0	0	-	-	-	-	-	-	-	-	-	-	-	-	-	-
255	CTR13251	DAKAR	2013	CTR	3	M	SURVIVOR	0	0	-	8	22.7	77	27.2	35.2	7	2.94	367	18	73.8	7.4	0.5	0.3
256	CTR13253	DAKAR	2013	CTR	4	F	SURVIVOR	0	0	-	-	-	-	-	-	-	-	-	-	-	-	-	-
257	CTR13254	DAKAR	2013	CTR	16	F	SURVIVOR	0	0	-	11.9	35.5	78	26.2	33.5	5.6	4.54	252	67.3	17	14.1	0.4	1.2
258	CTR13255	DAKAR	2013	CTR	7	F	SURVIVOR	0	0	-	12	36.2	73	24.1	33.1	4.3	4.97	414	32.2	48.1	14.6	4.2	0.9
259	CTR13256	DAKAR	2013	CTR	73	F	SURVIVOR	0	0	-	12.8	37.7	91	30.9	34	6	4.14	193	46.7	45.5	7.3	0.2	0.3
260	CTR13257	DAKAR	2013	CTR	52	M	SURVIVOR	0	0	-	-	-	-	-	-	-	-	-	-	-	-	-	-
261	CTR13258	DAKAR	2013	CTR	38	M	SURVIVOR	0	0	-	16.1	47.3	84	28.5	34	5	5.64	247	31	56.2	5.7	6.9	0.2
262	CTR13259	DAKAR	2013	CTR	7	F	SURVIVOR	0	0	-	12.4	36.8	77	25.9	33.7	6.9	4.74	247	53.6	33.3	12.3	0.5	0.3
263	CTR13261	DAKAR	2013	CTR	22	M	SURVIVOR	0	0	-	15.6	45.4	90	31	34.4	15.3	5.03	297	69.2	15.9	13.5	0.2	1.2
264	CTR13262	DAKAR	2013	CTR	28	F	SURVIVOR	0	0	-	11.9	34.8	84	28.7	34.2	5.5	4.14	226	54.6	35.3	6.4	1.9	1.8
265	CTR13263	DAKAR	2013	CTR	32	F	SURVIVOR	0	0	-	13.1	37.8	86	29.8	34.7	4.2	4.4	313	38	52.3	6.4	1.8	1.5
266	CTR13264	DAKAR	2013	CTR	21	F	SURVIVOR	0	0	-	13.4	40.7	85	27.9	32.9	6.3	4.81	261	67	21.2	10.1	0.6	1.1
267	CTR13265	DAKAR	2013	CTR	19	F	SURVIVOR	0	0	-	12.2	36.8	78	26	33.2	5.8	4.7	229	39.5	48.9	9.1	1.5	1
268	CTR13266	DAKAR	2013	CTR	6	F	SURVIVOR	0	0	-	11.7	33.7	75	26.1	34.7	15.2	4.49	287	72.4	14	12.2	0.9	0.5
269	CTR13267	DAKAR	2013	CTR	22	F	SURVIVOR	0	0	-	12.1	36.1	76	25.3	33.5	7.4	4.78	318	54.3	39.9	4.3	1	0.5
270	CTR13268	DAKAR	2013	CTR	10	F	SURVIVOR	0	0	-	12.5	36.7	78	26.7	34.1	6.9	4.69	298	41.6	44.6	9.4	4.2	0.2
271	CTR13269	DAKAR	2013	CTR	66	M	SURVIVOR	0	0	-	14.4	43	82	27.5	33.5	5.2	5.24	171	47.2	40.3	9	2.2	1.3
272	CTR13270	DAKAR	2013	CTR	3	M	SURVIVOR	0	0	-	10.9	31	72	25.4	35.2	5.8	4.29	419	36	46.9	12.6	3.7	0.8
273	CTR13271	DAKAR	2013	CTR	11	-	SURVIVOR	0	0	O+	9.3	29.4	60	18.9	31.6	7.3	4.92	331	41.7	39.6	11.3	5.6	1.8
274	CTR13272	DAKAR	2013	CTR	8	F	SURVIVOR	0	0	-	13	38.6	83	27.8	33.7	9.4	4.67	324	79.2	16	4.7	0	0.1
275	CTR13273	DAKAR	2013	CTR	58	M	SURVIVOR	0	0	-	13.3	38.3	81	28.1	34.7	17.2	4.74	350	71	18.9	8.5	0.1	1.5
276	CTR13274	DAKAR	2013	CTR	35	F	SURVIVOR	0	0	-	12.4	35.8	86	29.8	34.6	7.6	4.16	318	44.6	46.4	8	0.8	0.2
277	CTR13275	DAKAR	2013	CTR	8	-	SURVIVOR	0	0	-	12.7	38.2	80	26.7	33.2	7.6	4.76	283	64.2	24.9	10.1	0	0.8
278	CTR13276	DAKAR	2013	CTR	33	F	SURVIVOR	0	0	-	13.8	40.8	83	28	33.8	5.2	4.92	333	48.7	36.1	13.3	1	0.9
279	CTR13277	DAKAR	2013	CTR	17	M	SURVIVOR	0	0	-	-	-	-	-	-	-	-	-	-	-	-	-	-
280	CTR13278	DAKAR	2013	CTR	11	M	SURVIVOR	0	0	-	-	-	-	-	-	-	-	-	-	-	-	-	-
281	CTR13279	DAKAR	2013	CTR	72	F	SURVIVOR	0	0	-	12.9	38.6	91	30.4	33.4	4.4	4.24	261	36.2	48.1	13.6	1.4	0.7
282	CTR13280	DAKAR	2013	CTR	12	M	SURVIVOR	0	0	-	-	-	-	-	-	-	-	-	-	-	-	-	-
283	CTR13283	DAKAR	2013	CTR	71	M	SURVIVOR	0	0	-	15	43.7	93	31.8	34.3	5.5	4.72	282	72.4	22.4	3.9	0.8	0.5
284	CTR13285	DAKAR	2013	CTR	35	M	SURVIVOR	0	0	-	-	-	-	-	-	-	-	-	-	-	-	-	-
285	CTR13286	DAKAR	2013	CTR	39	M	SURVIVOR	0	0	-	14	40.5	84	28.9	34.6	4.9	4.84	201	55	34.1	6.6	3.6	0.7
286	CTR13287	DAKAR	2013	CTR	44	F	SURVIVOR	0	0	-	13	37.3	90	31.4	34.9	4.7	4.14	234	52.2	40.1	6.3	1.1	0.3
287	CTR13288	DAKAR	2013	CTR	51	F	SURVIVOR	0	0	-	11.6	34.6	85	28.4	33.5	5.6	4.09	278	46.1	43.9	8.3	0.6	1.1
288	CTR13290	DAKAR	2013	CTR	85	F	SURVIVOR	0	0	-	11	32.1	82	28	34.3	4.2	3.93	213	32.2	54.7	8.5	3	1.6
289	CTR13291	DAKAR	2013	CTR	32	M	SURVIVOR	0	0	-	13.9	39.9	84	29.2	34.8	7.5	4.76	197	59.2	26.6	9.9	1.3	3
290	CTR13292	DAKAR	2013	CTR	19	F	SURVIVOR	0	0	-	12.9	37.6	87	29.7	34.3	5.2	4.34	303	34.1	53	9.9	1.6	1.4
291	CTR13293	DAKAR	2013	CTR	27	M	SURVIVOR	0	0	-	15.1	44	84	29	34.3	4.5	5.21	257	31.8	43	21.2	1.8	2.2
292	CTR13294	DAKAR	2013	CTR	38	F	SURVIVOR	0	0	-	13.5	39.4	87	29.9	34.3	3.3	4.51	223	53.3	33.8	11.3	0.3	1.3
293	CTR13295	DAKAR	2013	CTR	60	F	SURVIVOR	0	0	-	11.7	33.9	74	25.7	34.5	6.1	4.56	292	53.9	40.6	3.8	0.7	1
294	CTR13296	DAKAR	2013	CTR	20	F	SURVIVOR	0	0	-	13.2	37.4	87	30.8	35.3	4.6	4.28	218	47.1	38.8	11.2	2.4	0.5
295	CTR13297	DAKAR	2013	CTR	35	F	SURVIVOR	0	0	-	12.9	37.6	84	28.9	34.3	5.1	4.47	282	46.9	36.2	9.4	5.9	1.6
296	CTR13299	DAKAR	2013	CTR	1	F	SURVIVOR	0	0	-	11.5	34	71	24	33.8	11.7	4.79	455	76.4	19.4	3.9	0.1	0.2
297	CTR13301	DAKAR	2013	CTR	30	M	SURVIVOR	0	0	-	11.3	32.7	81	27.8	34.6	13.8	4.06	94	62.3	22.6	11.3	3	0.8
298	CTR13302	DAKAR	2013	CTR	51	F	SURVIVOR	0	0	-	-	-	-	-	-	-	-	-	-	-	-	-	-
