# Supplementary material for: G6PD and HBB polymorphisms in the Senegalese population: prevalence, correlation with clinical malaria
Source: PeerJ. 2022 Jul 5;10:e13487. doi: 10.7717/peerj.13487 (PMC9266585; doi:10.7717/peerj.13487)
Supplement: Supplemental Information 3 — These data were used for statistical analysis. [file peerj-10-13487-s003.xls]

## Sheet: G6PD biological parameters_SNP
																								rs762515	New	New	New	rs1050828	New	rs782500951	New
																								SNP_10558_A/G	SNP_10588_C/A	SNP_10707_G/A	SNP_10776_G/C	SNP_10869_G/A	SNP_10983_G/C	SNP_11000_C/T	SNP_11062_T/A
		patient's CODE	Phenotype	Locality	Age	Sex	SURVIVAL	Length of stay in hospital	Parasitemia (P/µl)	Blood & Rhesus Group	Hb (g/100ml)	Hematocrit (%)	mean corpuscular volume: MCV (fL)	mean corpuscular hemoglobin MCH	mean corpuscular volume concentration MCHC (pg/cell)	White BC	Red BC	Platelets (x 103/µL)	Neutrophils (%)	Lymphocytes (%)	Monocytes (%)	Eosinophils (%)	Basophils (%)
		CTR13008	CTR	Dakar	38	F	SURVIVOR	0	0	-	10.4	30.9	76	25.5	33.7	-	-	554	52.6	34.5	9.1	2.7	1.1	G/G	A/C	G/G	G/G	G/G	G/G	C/C	T/T
		CTR13010	CTR	Dakar	6	F	SURVIVOR	0	0	-	13.2	37.8	84	29.3	34.9	8.2	4.5	291	74.6	9.1	14.6	0.3	1.4	A/A	C/C	G/G	G/G	G/G	G/G	C/C	A/T
		CTR13015	CTR	Dakar	16	F	SURVIVOR	0	0	-	11.2	33.6	71	23.6	33.3	7.2	4.74	342	47.1	44.3	7.3	1.1	0.2	A/A	C/C	G/G	G/G	G/G	G/G	C/C	T/T
		CTR13017	CTR	Dakar	89	F	SURVIVOR	0	0	-	16	47.5	95	32.1	33.7	4.7	4.99	305	49.6	43.7	5.5	0.5	0.7	G/A	A/C	G/G	G/G	G/G	G/G	C/C	A/T
		CTR13018	CTR	Dakar	5	F	SURVIVOR	0	0	-	8.9	26.5	83	27.9	33.6	17	3.19	684	63	28	8.2	0.3	0.5	G/A	C/C	G/G	G/G	G/G	G/G	C/C	T/T
		CTR13019	CTR	Dakar	72	F	SURVIVOR	0	0	-	14.1	41.5	78	26.4	34	6.1	5.35	208	43.6	48.3	6.8	0.7	0.6	A/A	A/C	G/G	G/G	G/G	G/G	C/C	A/A
		CTR13020	CTR	Dakar	2	M	SURVIVOR	0	0	O+	10.9	31.9	73	24.8	34.2	9.1	4.4	493	43.3	41.3	12.3	2	1	A/A	C/C	G/G	G/G	G/G	G/G	C/C	T/T
		CTR13021	CTR	Dakar	-	-	SURVIVOR	0	0	-														G/A	C/C	G/G	G/G	G/G	G/G	C/C	T/T
		CTR13022	CTR	Dakar	42	M	SURVIVOR	0	0	-	15	44	95	32.4	34.1	7	4.63	278	42	43.6	6.8	4.3	3.3	G/G	A/C	G/G	G/G	G/G	G/G	C/C	A/T
		CTR13023	CTR	Dakar	64	M	SURVIVOR	0	0	-	13.7	40.3	89	30.3	34	10.1	4.52	294	74.3	14.2	10.6	0.6	0.3	A/A	C/C	G/G	G/G	G/G	G/G	C/C	A/T
		CTR13024	CTR	Dakar	60	M	SURVIVOR	0	0	-	-	-	-	-	-	-	-	-	-	-	-	-	-	A/A	C/C	G/G	G/G	G/G	G/G	C/C	T/T
		CTR13025	CTR	Dakar	42	M	SURVIVOR	0	0	-	14.5	42.8	89	30.1	33.9	4.3	4.81	254	35.1	45.8	10.3	5.9	2.6	G/G	C/C	G/G	G/G	G/G	G/G	C/C	A/T
		CTR13027	CTR	Dakar	28	F	SURVIVOR	0	0	-	-	-	-	-	-	-	-	-	-	-	-	-	-	A/A	C/C	G/G	G/G	G/G	G/G	C/C	T/T
		CTR13028	CTR	Dakar	2	M	SURVIVOR	0	0	-	10.9	32.3	65	21.9	33.7	7.9	4.98	375	47.9	39.4	9.5	2	1.2	G/G	C/C	G/G	G/G	G/G	G/G	C/C	T/T
		CTR13030	CTR	Dakar	9	F	SURVIVOR	0	0	A +	12.1	34.9	84	29	34.7	5.1	4.17	283	35.6	40.5	16.6	5	2.3	A/A	C/C	G/G	G/G	G/G	G/G	C/C	T/T
		CTR13031	CTR	Dakar	-	-	-	-	-	-	-	-	-	-	-	-	-	-	-	-	-	-	-	G/A	C/C	G/G	G/G	G/G	G/G	C/C	A/T
		CTR13032	CTR	Dakar	34	F	SURVIVOR	0	0	-	11.9	34.8	89	30.5	34.2	5	3.9	232	28.4	56.4	7.9	5.7	2.6	G/A	C/C	G/G	G/G	G/G	G/G	C/C	T/T
		CTR13033	CTR	Dakar	44	F	SURVIVOR	0	0	-	11	32.8	85	28.4	33.5	7.6	3.87	290	55	33	6.9	4.3	0.8	A/A	A/C	G/G	G/G	G/G	G/G	C/C	T/T
		CTR13034	CTR	Dakar	16	F	SURVIVOR	0	0	-	-	-	-	-	-	-	-	-	-	-	-	-	-	G/G	C/C	G/G	G/G	G/G	G/G	C/C	A/T
		CTR13035	CTR	Dakar	28	F	SURVIVOR	0	0	-	11.2	33.1	86	28.9	33.8	7.4	3.87	339	45.9	40.4	8.4	3.8	1.5	A/A	C/C	G/G	G/G	G/G	G/G	C/C	T/T
		CTR13036	CTR	Dakar	6	M	SURVIVOR	0	0	-	12.8	38	79	26.7	33.7	5.2	4.79	329	14.7	76.9	7.1	0.6	0.7	A/A	A/C	G/G	G/G	G/G	G/G	C/C	A/T
		CTR13037	CTR	Dakar	12	M	SURVIVOR	0	0	-	-	-	-	-	-	-	-	-	-	-	-	-	-	A/A	C/C	G/G	G/G	G/G	G/G	C/C	T/T
		CTR13039	CTR	Dakar	-																			G/A	C/C	G/G	G/G	G/G	G/G	C/C	T/T
		CTR13040	CTR	Dakar	62	M	SURVIVOR	0	0	-	-	-	-	-	-	-	-	-	-	-	-	-	-	A/A	C/C	G/G	G/G	G/G	G/G	C/C	A/T
		CTR13041	CTR	Dakar	55	M	SURVIVOR	0	0	-	14.6	43.2	84	28.3	33.8	6.9	5.16	221	64.2	17.5	12.5	3.7	2.1	A/A	C/C	G/G	G/G	G/G	G/G	C/C	A/T
		CTR13042	CTR	Dakar	28	F	SURVIVOR	0	0	-	12	34.9	87	30.1	34.4	4.8	3.99	268	40.9	45.7	8	5.3	0.1	G/G	C/C	G/G	G/G	G/G	G/G	C/C	A/T
		CTR13044	CTR	Dakar	3	M	SURVIVOR	0	0	A +	11.8	35.1	72	24.3	33.6	5	4.85	518	32	64.1	0.5	2.5	0.9	A/A	A/C	G/G	G/G	G/G	G/G	C/C	A/T
		CTR13045	CTR	Dakar	76	M	SURVIVOR	0	0	-	15.4	44.6	86	29.6	34.5	4.6	5.21	210	31.9	55	5.4	7.4	0.3	A/A	A/C	G/G	G/G	G/G	G/G	C/C	T/T
		CTR13046	CTR	Dakar	3	M	SURVIVOR	0	0	-	10.4	32	67	21.6	32.5	6	4.81	584	39.6	49.5	8	0.7	2.2	A/A	C/C	G/G	G/G	G/G	G/G	C/C	T/T
		CTR13047	CTR	Dakar																				A/A	A/C	G/G	G/G	G/G	G/G	C/C	T/T
		CTR13048	CTR	Dakar	52	F	SURVIVOR	0	0	-	11	32.8	79	26.4	33.5	3.1	4.17	142	38.8	44.7	15.8	0.2	0.5	G/A	C/C	G/G	G/G	G/G	G/G	C/C	T/T
		CTR13049	CTR	Dakar	83	F	SURVIVOR	0	0	-	12	34.3	93	32.4	35	5	3.7	237	50.9	34.5	9.9	4.2	0.5	G/G	C/C	G/G	G/G	G/G	G/G	C/C	T/T
		CTR13050	CTR	Dakar	37	F	SURVIVOR	0	0	-	11.6	33.9	78	26.9	34.2	7.1	4.32	191	64.6	24.5	7.5	2.2	1.2	G/G	C/C	G/G	G/G	G/G	G/G	C/C	T/T
		CTR13051	CTR	Dakar	7	F	SURVIVOR	0	0	A +	10.9	31.8	81	27.6	34.3	4.9	3.95	538	23.5	56.3	12.7	5.2	2.3	G/A	C/C	G/G	G/G	G/G	G/G	C/C	T/T
		CTR13052	CTR	Dakar	63	F	SURVIVOR	0	0	-	-	-	-	-	-	-	-	-	-	-	-	-	-	A/A	C/C	G/G	G/G	G/G	G/G	C/C	T/T
		CTR13053	CTR	Dakar	26	M	SURVIVOR	0	0	-	16.1	48.5	85	28.2	33.2	3.8	5.7	228	25.7	68	0.4	5.5	0.4	G/G	C/C	G/G	G/G	G/G	G/G	C/C	T/T
		CTR13054	CTR	Dakar	61	M	SURVIVOR	0	0	-	12.9	37.8	75	25.7	34.1	14.3	5.02	244	75.8	6.6	8.7	8.2	0.7	A/A	A/C	G/G	G/G	G/G	G/G	C/C	T/T
		CTR13055	CTR	Dakar	51	M	SURVIVOR	0	0	-	14	41.1	82	27.9	34.1	4.3	5.01	234	41.1	47.5	8.1	1.9	1.4	A/A	A/C	G/G	G/G	G/G	G/G	C/C	T/T
		CTR13058	CTR	Dakar	58	M	SURVIVOR	0	0	-	15.9	46.5	85	29.2	34.2	4.7	5.45	213	38.2	47.2	7.3	7	0.3	A/A	A/C	G/G	G/G	G/G	G/G	C/C	T/T
		CTR13059	CTR	Dakar	-	-	SURVIVOR	0	0	-	-	-	-	-	-	-	-	-	-	-	-	-	-	G/A	C/C	G/G	G/G	G/A	G/G	C/C	T/T
		CTR13061	CTR	Dakar	2	M	SURVIVOR	0	0	-	-	-	-	-	-	-	-	-	-	-	-	-	-	A/A	A/C	G/G	G/G	G/G	G/G	C/C	A/T
		CTR13062	CTR	Dakar	36	F	SURVIVOR	0	0	-	11.8	37.1	72	22.8	31.8	11.3	5.18	231	71.1	18.4	9.1	1	0.4	A/A	C/C	G/G	G/G	G/G	G/G	C/C	T/T
		CTR13063	CTR	Dakar	63	F	SURVIVOR	0	0	-	8.9	27.3	105	34.1	32.6	2.7	2.61	163	60.4	28.6	9.8	0.6	0.6	G/A	A/C	G/G	G/G	G/G	G/G	C/C	T/T
		CTR13065	CTR	Dakar	32	M	SURVIVOR	0	0	-	14	41.7	80	26.8	33.6	5.5	5.22	245	38.2	46.5	8.3	5.2	1.8	A/A	A/C	G/G	G/G	G/G	G/G	C/C	T/T
		CTR13067	CTR	Dakar	11	F	SURVIVOR	0	0	-	12.3	35.2	85	29.8	34.9	3.6	4.13	275	32.5	50.2	14.6	1.4	1.3	G/A	C/C	G/G	G/G	G/G	G/G	C/C	T/T
		CTR13068	CTR	Dakar	24	F	SURVIVOR	0	0	-	12.6	36.3	83	28.8	34.7	4.8	4.37	227	52.4	28.6	10.3	7.2	1.5	G/G	C/C	G/G	G/G	G/G	G/G	C/C	T/T
		CTR13069	CTR	Dakar	21	F	SURVIVOR	0	0	-	13.1	38.9	83	27.9	33.7	7.4	4.7	291	39.7	35.2	9.1	14.7	1.3	A/A	C/C	G/G	G/G	G/G	G/G	C/C	A/T
		CTR13070	CTR	Dakar	36	F	SURVIVOR	0	0	-	13	37.3	83	28.9	34.9	6.4	4.5	410	59.2	28.3	8.7	1.9	1.9	A/A	C/C	G/G	G/G	G/G	G/G	C/C	A/T
		CTR13071	CTR	Dakar	41	F	SURVIVOR	0	0	-	12.5	37.7	76	25.4	33.2	6.3	4.93	287	53.1	28.3	10.9	5.8	1.9	G/A	C/C	G/G	G/G	G/G	G/G	C/C	T/T
		CTR13072	CTR	Dakar	5	M	SURVIVOR	0	0	O+	11.8	33.9	80	27.9	34.8	4.3	4.23	259	31.8	60.9	3.3	2.4	1.6	A/A	C/C	G/G	G/G	G/G	G/C	C/C	T/T
		CTR13073	CTR	Dakar	28	F	SURVIVOR	0	0	-	10.4	31.8	72	23.4	32.7	6.9	4.44	530	52.8	35	8.8	2.2	1.2	A/A	C/C	G/G	G/G	G/G	G/G	C/C	T/T
		CTR13074	CTR	Dakar	28	M	SURVIVOR	0	0	-	15.9	46.5	79	27	34.2	6	5.89	203	38.4	43.8	10.7	3.9	3.2	A/A	C/C	G/G	G/G	G/G	G/G	C/C	T/T
		CTR13075	CTR	Dakar	60	M	SURVIVOR	0	0	-	-	-	-	-	-	-	-	-	-	-	-	-	-	A/A	C/C	G/G	G/G	G/G	G/G	C/C	T/T
		CTR13077	CTR	Dakar	52	F	SURVIVOR	0	0	-	8.9	26.8	86	28.4	33.2	7.4	3.13	370	69.7	19.9	7.6	2.1	0.7	A/A	C/C	G/G	G/G	G/G	G/G	C/C	A/T
		CTR13078	CTR	Dakar	46	F	SURVIVOR	0	0	-	12.7	36.9	93	31.9	34.4	4.4	3.98	223	47.2	32.4	16.7	1.5	2.2	G/A	C/C	G/G	G/G	G/A	G/G	C/C	T/T
		CTR13079	CTR	Dakar	37	F	SURVIVOR	0	0	-	-	-	-	-	-	-	-	-	-	-	-	-	-	A/A	C/C	G/G	G/G	G/G	G/G	C/C	T/T
		CTR13080	CTR	Dakar	59	M	SURVIVOR	0	0	-	14.6	42.1	86	29.9	34.7	7.3	4.89	261	46.3	32.5	11.8	7.3	2.1	A/A	C/C	G/G	G/G	G/G	G/G	C/C	T/T
		CTR13081	CTR	Dakar	23	F	SURVIVOR	0	0	-	11.4	33	80	27.5	34.5	4.6	4.14	336	39	42.2	11.6	5	2.2	A/A	C/C	G/G	G/G	G/G	G/G	C/C	T/T
		CTR13082	CTR	Dakar	44	M	SURVIVOR	0	0	-	14.8	43.2	81	27.8	34.3	5.7	5.32	238	41.7	42.3	11.9	2.7	1.4	A/A	C/C	G/G	G/G	G/G	G/G	C/C	T/T
		CTR13083	CTR	Dakar	34	F	SURVIVOR	0	0	-	11.3	33.4	85	28.9	33.8	6.7	3.91	264	32.8	30	6.1	30.2	0.9	G/A	C/C	G/G	G/G	G/G	G/G	C/C	T/T
		CTR13084	CTR	Dakar	14	M	SURVIVOR	0	0	O+	10.7	30.9	79	27.5	34.6	7.3	3.89	169	53.4	35.4	7.6	2.5	1.1	A/A	C/C	G/G	G/G	G/G	G/G	C/C	T/T
		CTR13086	CTR	Dakar	46	F	SURVIVOR	0	0	-	13.8	40	88	30.2	34.5	5.9	4.57	438	57.6	31.4	5.9	3.9	1.2	G/A	C/C	G/G	G/G	G/G	G/G	C/C	T/T
		CTR13087	CTR	Dakar	29	F	SURVIVOR	0	0	-	13.5	37.8	87	31	35.7	6.2	4.36	266	49.5	40.3	7.1	1.6	1.5	G/A	C/C	G/G	G/G	G/G	G/G	C/C	A/T
		CTR13088	CTR	Dakar	42	M	SURVIVOR	0	0	-	15.7	46.1	83	28.4	34.1	4.6	5.53	192	43.3	41.1	8.3	6.1	1.2	G/G	C/C	G/G	G/G	G/G	G/G	C/C	T/T
		CTR13089	CTR	Dakar	40	F	SURVIVOR	0	0	-	13.5	39.3	89	30.7	34.4	7.1	4.4	314	51.3	36.5	10.7	0.9	0.6	G/A	C/C	G/G	G/G	G/G	G/G	C/C	T/T
		CTR13090	CTR	Dakar	46	M	SURVIVOR	0	0	-	13.7	39.8	85	29.3	34.4	4.9	4.68	181	43.3	44.1	6.6	5.7	0.3	A/A	C/C	G/G	G/G	G/G	G/G	C/C	T/T
		CTR13091	CTR	Dakar	8	F	SURVIVOR	0	0	-	13.6	39.6	79	27	34.3	6.4	5.04	198	53	27.4	17.2	1.7	0.7	A/A	C/C	G/G	G/G	G/G	G/G	C/C	T/T
		CTR13092	CTR	Dakar	21	F	SURVIVOR	0	0	O+	11.7	34.4	86	29.1	34	8.9	4.02	208	64.8	22.5	6.7	4.8	1.2	A/A	C/C	G/G	G/G	G/G	G/G	C/C	T/T
		CTR13093	CTR	Dakar	4	M	SURVIVOR	0	0	B +	11.6	34.4	76	25.5	33.7	8.5	4.55	352	57.8	17.8	20.1	0.3	4	A/A	C/C	G/G	G/G	G/G	G/G	C/C	T/T
		CTR13094	CTR	Dakar	41	M	SURVIVOR	0	0	-	15.5	46	80	26.8	33.7	5.9	5.78	214	37.2	50.2	7.4	3.6	1.6	A/A	C/C	G/G	G/G	G/G	G/G	C/C	T/T
		CTR13097	CTR	Dakar	11	F	SURVIVOR	0	0	-	12.3	35.2	85	29.8	34.9	3.6	4.13	275	32.5	50.2	14.6	1.4	1.3	G/G	C/C	G/G	G/G	G/G	G/G	C/C	T/T
		TM13001	CTR	Dakar	39	M	SURVIVOR	0	0	A +	13.5	39.2	85	29.3	34.4	5.1	4.6	257	38.8	37.8	7.4	14.4	1.6	A/A	C/C	G/G	G/G	G/G	G/G	C/C	T/T
		TM13002	CTR	Dakar	29	M	SURVIVOR	0	0	A +	15.6	46.7	85	28.5	33.4	3.7	5.48	218	47.8	44.4	6.1	1	0.7	A/A	A/C	G/G	G/G	G/G	G/G	C/C	T/T
		TM13004	CTR	Dakar	26	F	SURVIVOR	0	0	A +	13.7	40.6	84	28.4	33.7	4.3	4.82	211	47.1	39.4	10.6	1.7	1.2	A/A	C/C	G/G	G/G	G/G	G/G	C/C	T/T
		TM13005	CTR	Dakar	26	F	SURVIVOR	0	0	O +	12.7	36.5	81	28.3	34.8	4.4	4.48	282	49.3	45.2	4.7	0.5	0.3	G/A	A/C	G/G	G/G	G/G	G/G	C/C	T/T
		TM13006	CTR	Dakar	29	M	SURVIVOR	0	0	O +		46.3	88	29.8	33.9	5.3	5.27	277	46.6	39.3	6.1	6.3	1.5	G/G	C/C	G/G	G/G	G/G	G/G	C/C	T/T
		TM13007	CTR	Dakar	23	F	SURVIVOR	0	0	O +	13	38.9	79	26.5	33.4	3.8	4.9	321	44	45.2	6.4	3.3	1.1	A/A	C/C	G/G	G/G	G/G	G/G	C/C	A/T
		TM13008	CTR	Dakar	30	M	SURVIVOR	0	0	A +	15.3	45.4	79	26.5	33.7	4.7	5.78	253	43.8	47	2	6.9	0.2	A/A	A/C	G/G	G/G	G/G	G/G	C/C	T/T
		TM13009	CTR	Dakar	27	M	SURVIVOR	0	0	-	14.7	42.7	90	31.1	34.4	6.1	4.72	312	31	52	3.3	13.6	0.1	G/G	C/C	G/G	G/G	G/G	G/C	C/C	-99
		TM13010	CTR	Dakar	24	F	SURVIVOR	0	0	O +	11.3	33.6	81	27.2	33.6	7.2	4.16	219	62.6	21	12.3	2.7	1.4	G/G	C/C	G/G	G/G	G/A	G/G	C/C	A/T
		TM13011	CTR	Dakar	29	F	SURVIVOR	0	0	-	-	-	-	-	-	8.8	-	-	-	-	-	-	-	G/A	C/C	G/G	G/G	G/G	G/G	C/C	A/T
		TM13014	CTR	Dakar	28	M	SURVIVOR	0	0	O +	14.9	43.8	85	28.8	34	5.4	5.17	314	35.4	43.9	7.6	11.2	1.9	A/A	C/C	G/G	G/G	G/G	G/G	C/C	A/T
		TM13015	CTR	Dakar	48	F	SURVIVOR	0	0	B +	13.4	38.9	84	29	34.4	8.4	4.62	319	53.3	27.7	8.7	9.4	0.9	G/A	C/C	G/G	G/G	G/G	G/G	C/C	A/T
		TM13016	CTR	Dakar	57	M	SURVIVOR	0	0	-	14	42	78	26.1	33.3	4.3	5.36	202	34.2	58.5	4.3	2.9	0.1	A/A	C/C	G/G	G/G	G/G	G/G	C/C	T/T
		TM13017	CTR	Dakar	27	M	SURVIVOR	0	0	O +	14.9	44.2	81	27.1	33.7	5.7	5.49	215	34.7	46.8	5.1	12.8	0.6	A/A	C/C	G/G	G/G	G/G	G/G	C/C	T/T
		TM13018	CTR	Dakar	29	M	SURVIVOR	0	0	-	16.5	48.3	87	29.8	34.2	5.1	5.54	287	34.1	52.5	6.8	5.4	1.2	A/A	A/C	G/G	G/G	G/G	G/G	C/C	T/T
		TM14002	CTR	Dakar	26	F	SURVIVOR	0	0	O+	11.8	37.2	78	24.7	31.7	4.4	4.77	194	31.5	53.1	10	4.6	0.8	A/A	C/C	G/G	G/G	G/G	G/C	C/C	A/T
		TM14003	CTR	Dakar	25	F	SURVIVOR	0	0	B+	13.7	41.3	86	28.4	33.2	3.9	4.83	277	52.8	32.5	7.2	6.8	0.7	A/A	C/C	G/G	G/G	G/G	G/G	C/C	A/T
		TM14004	CTR	Dakar	27	F	SURVIVOR	0	0	B+	12.2	36.4	83	27.7	33.5	3.6	4.41	242	31.8	51.8	12.6	3.5	0.3	G/G	C/C	G/G	G/G	G/G	G/G	C/C	T/T
		TM14005	CTR	Dakar	23	M	SURVIVOR	0	0	A+	15	45.7	87	28.5	32.8	5.1	5.27	258	40	49.9	7.9	1	1.2	A/A	C/C	G/G	G/G	G/G	G/G	C/C	T/T
		TM14006	CTR	Dakar	24	F	SURVIVOR	0	0	-	12	37.4	80	25.7	32.1	5	4.67	324	51.9	37.6	7.8	2.6	0.1	G/A	C/C	G/G	G/G	G/G	G/G	C/C	T/T
		TM14007	CTR	Dakar	25	F	SURVIVOR	0	0	-	12.1	36.6	88	29	33.1	3.8	4.17	220	39.6	47.9	8.2	3.5	0.8	A/A	C/C	G/G	G/G	G/G	G/G	C/C	A/T
		TM14008	CTR	Dakar	26	F	SURVIVOR	0	0	-	13.4	39.7	84	28.2	33.8	5.6	4.75	313	33	55.9	7.5	3.4	0.2	G/A	C/C	G/G	G/G	G/G	G/G	C/C	A/T
		TM14009	CTR	Dakar	41	F	SURVIVOR	0	0	-	14.3	42.8	83	27.7	33.4	3.5	5.16	205	34.2	56.2	7.7	1.1	0.8	A/A	A/C	G/G	G/G	G/G	G/G	C/C	T/T
		TM14010	CTR	Dakar	53	M	SURVIVOR	0	0	AB+	14.6	44.1	93	30.7	33.1	4.3	4.75	201	32.6	48.9	8.4	9	1.1	A/A	C/C	G/G	G/G	G/G	G/G	C/C	T/T
		TM14011	CTR	Dakar	24	F	SURVIVOR	0	0	-	11.8	36.1	83	27.1	32.7	5.5	4.35	258	49.5	40.2	7.7	1.1	1.5	G/A	C/C	G/G	G/G	G/G	G/G	C/C	T/T
		TM14012	CTR	Dakar	39	F	SURVIVOR	0	0	-	16.1	47.7	92	31	33.8	8.7	5.19	266	46.3	37.2	14	1.9	0.6	G/G	C/C	G/G	G/G	G/G	G/G	C/C	T/T
		CTR13024	CTR	Dakar	60	M	SURVIVOR	0	0	-	-	-	-	-	-	-	-	-	-	-	-	-	-	G/G	C/C	G/G	G/G	G/G	G/G	C/C	T/T
		TM14001	CTR	Dakar	25	M	SURVIVOR	0	0	O+	16.5	48.8	89	30	33.8	5.9	5.5	180	31.8	61.2	5.2	1.6	0.2	G/G	C/C	G/G	G/G	G/G	G/G	C/C	T/T
		CTR13008	CTR	Dakar	38	F	SURVIVOR	0	0	-	10.4	30.9	76	25.5	33.7	-	-	554	52.6	34.5	9.1	2.7	1.1	G/G	A/C	G/G	G/G	G/G	G/G	C/C	T/T
		CTR13011	CTR	Dakar	24	M	SURVIVOR	0	0	-	-	-	-	-	-	-	-	-	-	-	-	-	-	G/G	A/C	G/G	G/G	G/G	G/G	C/C	T/T
		CTR13016	CTR	Dakar	65	F	SURVIVOR	0	0	-	12	36.3	86	28.4	33.1	6.6	4.22	415	49.9	39.5	8.3	1.6	0.7	G/A	C/C	G/G	G/G	G/G	G/G	C/C	T/T
		CTR13014	CTR	Dakar	32	F	SURVIVOR	0	0	-	11.9	35.4	91	30.5	33.6	-	-	193	57.2	32.6	7.7	1.3	1.2	G/A	C/C	G/G	G/G	G/G	G/G	C/C	T/T
		CTR13012	CTR	Dakar	45	M	SURVIVOR	0	0	-	-	-	-	-	-	-	-	-	-	-	-	-	-	A/A	C/C	G/G	G/G	G/G	G/G	C/C	T/T
		CTR13057	CTR	Dakar	42	M	SURVIVOR	0	0	-	16.7	48.9	85	29.2	34.2	6.4	5.72	206	38.3	37.7	17.6	4.3	2.1	A/A	C/C	G/G	G/G	G/G	G/G	C/C	T/T
		TM14013	CTR	Dakar	61	M	SURVIVOR	0	0	-	12.7	38.6	88	29.1	32.9	7.6	4.37	388	60.5	27.6	7.8	2.2	1.9	A/A	C/C	G/G	G/G	G/G	G/G	C/C	T/T
		CTR13026	CTR	Dakar	34	F	SURVIVOR	0	0	-	13.7	41.2	80	26.4	33.3	4.9	5.18	238	61.2	27.9	9.4	0.5	1	A/A	C/C	G/G	G/G	G/G	G/G	C/C	T/T
		CTR13010	CTR	Dakar	6	F	SURVIVOR	0	0	-	13.2	37.8	84	29.3	34.9	8.2	4.5	291	74.6	9.1	14.6	0.3	1.4	A/A	C/C	G/G	G/G	G/G	G/G	C/C	A/T
		CTR13033	CTR	Dakar	44	F	SURVIVOR	0	0	-	11	32.8	85	28.4	33.5	7.6	3.87	290	55	33	6.9	4.3	0.8	A/A	C/C	G/G	G/G	G/G	G/G	C/C	T/T
		CTR13013	CTR	Dakar	59	F	SURVIVOR	0	0	-	-	-	-	-	-	-	-	-	-	-	-	-	-	A/A	A/C	G/G	G/G	G/G	G/G	C/C	A/T
		CTR13066	CTR	Dakar	39	M	SURVIVOR	0	0	-	13.4	39.8	80	26.9	33.7	4.9	4.99	198	28.4	53.4	7.1	10.9	0.2		A/C	G/G	G/G	G/G	G/G	C/C	T/T
		PS04042	uncomplicated malaria	Dakar	53	F	SURVIVOR	0	-	-	-	-	-	-	-	-	-	-	-	-	-	-	-	G/A	A/C	G/G	G/G	G/G	G/G	C/C	T/T
		PS04007	uncomplicated malaria	Dakar	-	F	SURVIVOR	0	-	-	-	-	-	-	-	-	-	-	-	-	-	-	-	A/A	C/C	G/G	G/G	G/G	G/G	C/C	T/T
		PS04003	uncomplicated malaria	Dakar	-	M	SURVIVOR	0	-	-	-	-	-	-	-	-	-	-	-	-	-	-	-	A/A	A/C	G/G	G/G	G/G	G/G	C/C	T/T
		PS04017	uncomplicated malaria	Dakar	28	M	SURVIVOR	0	-	-	-	-	-	-	-	-	-	-	-	-	-	-	-	G/A	C/C	G/G	G/G	G/G	G/G	C/C	T/T
		PS04018	uncomplicated malaria	Dakar	15	F	SURVIVOR	0	-	-	-	-	-	-	-	-	-	-	-	-	-	-	-	G/A	C/C	G/G	G/G	G/G	G/G	C/C	T/T
		TA14028	uncomplicated malaria	Tamba	0	F	SURVIVOR	0	1345	0+	14.1	42.7	107.9	35.6	33	6.8	3.96	133	-	-	-	-	-	G/A	C/C	G/G	G/G	G/G	G/G	C/C	T/T
		PS13009	uncomplicated malaria	Dakar	10	F	SURVIVOR	0	2800	O+	11.3	32.5	81	28.1	34.8	8.7	4.02	139	69.5	16.9	10	3.1	0.5	A/A	A/C	G/G	G/G	G/G	G/G	C/C	T/T
		PS04037	uncomplicated malaria	Dakar	31	M	SURVIVOR	0	-	-	-	-	-	-	-	-	-	-	-	-	-	-	-	A/A	A/C	G/G	G/G	G/G	G/G	C/C	T/T
		PS04026	uncomplicated malaria	Dakar	44	F	SURVIVOR	0	-	-	-	-	-	-	-	-	-	-	-	-	-	-	-	A/A	A/C	G/G	G/G	G/G	G/G	C/C	T/T
		PS04038	uncomplicated malaria	Dakar	31	M	SURVIVOR	0	-	-	-	-	-	-	-	-	-	-	-	-	-	-	-	G/G	A/C	G/G	G/G	G/G	G/G	C/C	A/T
		TA14019	uncomplicated malaria	Tambacounda	37	M	SURVIVOR	0	259	-	13.4	42	93.6	30.6	32.7	4.16	4.38	225	-	-	-	-	-	G/G	C/C	G/G	G/G	G/G	G/G	C/C	T/T
		PS04012	uncomplicated malaria	Dakar	-	M	SURVIVOR	0	-	-	-	-	-	-	-	-	-	-	-	-	-	-	-	G/A	C/C	G/G	G/G	G/G	G/G	C/C	T/T
		SL14010	uncomplicated malaria	Saint-Louis	31	F	SURVIVOR	0	360	-	16	50.7	-	-	-	6.7	5.3	233	-	-	-	-	-	A/A	C/C	G/G	G/G	G/G	G/G	C/C	T/T
		TA14087	uncomplicated malaria	Tambacounda	0	F	SURVIVOR	0	561	A+	13.7	40.5	-	-	-	6.21	4.29	137	-	-	-	-	-	G/A	C/C	G/G	G/G	G/G	G/G	C/C	T/T
		PS04008	uncomplicated malaria	Dakar	-	F	SURVIVOR	0	-	-	-	-	-	-	-	-	-	-	-	-	-	-	-	A/A	A/C	G/G	G/G	G/G	G/G	T/C	T/T
		TA14083	uncomplicated malaria	Tambacounda	63	M	SURVIVOR	0	80	-	12.8	36.9	-	-	-	4.04	2.68	191	-	-	-	-	-	G/G	C/C	G/G	G/G	G/G	G/G	C/C	T/T
		PS04014	uncomplicated malaria	Dakar	-	M	SURVIVOR	0	-	-	-	-	-	-	-	-	-	-	-	-	-	-	-	A/A	A/A	G/G	G/G	G/G	G/G	C/C	T/T
		PS04028	uncomplicated malaria	Dakar	8	F	SURVIVOR	0	-	-	-	-	-	-	-	-	-	-	-	-	-	-	-	A/A	A/C	G/G	G/G	G/G	G/G	C/C	T/T
		PS04019	uncomplicated malaria	Dakar	12	-	SURVIVOR	0	-	-	-	-	-	-	-	-	-	-	-	-	-	-	-	A/A	C/C	G/G	G/G	G/G	G/G	C/C	T/T
		PS04029	uncomplicated malaria	Dakar	30	M	SURVIVOR	0	-	-	-	-	-	-	-	-	-	-	-	-	-	-	-	G/G	C/C	G/G	G/G	A/A	G/G	C/C	T/T
		KO15045	uncomplicated malaria	Dakar	4	F	SURVIVOR	0	707	-	12.4	36.8	82.5	27.8	33.7	6.1	4.46	52	74.2	20	-	-	-	G/A	A/C	G/G	G/G	G/G	G/G	C/C	T/T
		TA14001	uncomplicated malaria	Dakar	25	M	SURVIVOR	0	391	-	10.7	30.7	87	30.7	34.9	12.31	3.49	48	-	-	-	-	-	A/A	C/C	G/G	G/G	G/G	G/G	C/C	T/T
		PS04015	uncomplicated malaria	Dakar	-	F	SURVIVOR	0	-	-	-	-	-	-	-	-	-	-	-	-	-	-	-	A/A	A/C	G/G	G/G	G/G	G/G	C/C	T/T
		TA14076	uncomplicated malaria	Dakar	0	F	SURVIVOR	0	126	B+	13.3	38.1	-	-	-	11.9	3.26	126	-	-	-	-	-	G/G	C/C	G/G	G/G	G/G	G/G	C/C	T/T
		PS04044	uncomplicated malaria	Dakar	2	F	SURVIVOR	0	-	-	-	-	-	-	-	-	-	-	-	-	-	-	-	-99	-99	G/G	G/G	G/A	G/G	C/C	T/T
		TA14048	uncomplicated malaria	Dakar	0	F	SURVIVOR	0	281	B+	14.9	44.1	96.7	32.7	33.8	7.18	4.56	220	-	-	-	3.6	0.3	A/A	C/C	G/G	G/G	G/G	G/G	C/C	T/T
		TA14090	uncomplicated malaria	Dakar	30	M	SURVIVOR	0	253	-	10	27.9	-	-	-	7	3.36	326	-	-	-	-	-	G/A	C/C	G/G	G/G	G/G	G/G	C/C	T/T
		PS04013	uncomplicated malaria	Dakar	-	F	SURVIVOR	0	-	-	-	-	-	-	-	-	-	-	-	-	-	-	-	G/G	A/C	G/G	G/G	G/G	G/G	C/C	T/T
		TA14055	uncomplicated malaria	Dakar	32	M	SURVIVOR	0	90	-	12.9	39.1	87.2	28.8	33	8.33	4.48	256	-	-	-	-	-	A/A	C/C	G/G	G/G	G/G	G/G	C/C	T/T
		TA14101	uncomplicated malaria	Dakar	0	F	SURVIVOR	0	236	B+	14.3	42.9	-	-	-	11.2	4.17	246	-	-	-	-	-	G/A	C/C	G/G	G/G	G/G	G/G	C/C	T/T
		TA14063	uncomplicated malaria	Dakar	0	M	SURVIVOR	0	480	O+	6.3	35.5	-	-	-	9.29	3.23	480	-	-	-	-	-	A/A	C/C	G/G	G/G	G/G	G/G	C/C	T/T
		TA14008	uncomplicated malaria	Dakar	0	F	SURVIVOR	0	1466	-	14.7	42.7	105	36.1	34.4	13.56	4.07	71	-	-	-	-	-	A/A	C/C	G/G	C/C	G/G	G/G	C/C	T/T
		SL14004	uncomplicated malaria	Dakar	25	F	SURVIVOR	0	842	-	13	39.2	-	-	-	8.8	4.81	366	-	-	-	-	-	G/A	C/C	G/G	G/G	G/G	G/G	C/C	T/T
		PS04048	uncomplicated malaria	Dakar	16	M	SURVIVOR	0	-	-	-	-	-	-	-	-	-	-	-	-	-	-	-	G/G	A/C	G/G	G/G	G/G	G/G	C/C	T/T
		TA14033	uncomplicated malaria	Dakar	0	M	SURVIVOR	0	800	O+	15.8	47.8	107	33.3	33	9.03	4.75	103	-	-	-	-	-	A/A	C/C	G/G	G/G	G/G	G/G	C/C	T/T
		TA14077	uncomplicated malaria	Dakar	17	M	SURVIVOR	0	413	-	10.7	32.6	-	-	-	5.87	4.72	413	-	-	-	-	-	A/A	C/C	G/G	G/G	G/G	G/G	C/C	T/T
		TA14027	uncomplicated malaria	Dakar	40	M	SURVIVOR	0	237	-	12.7	38.4	84.4	27.9	33.1	6.2	4.55	306	-	-	-	-	-	G/G	C/C	G/G	G/G	G/G	G/G	C/C	T/T
		PS04040	uncomplicated malaria	Dakar	-	F	SURVIVOR	0	-	-	-	-	-	-	-	-	-	-	-	-	-	-	-	A/A	A/C	G/G	G/G	G/G	G/G	C/C	T/T
		TA14046	uncomplicated malaria	Dakar	0	F	SURVIVOR	0	105	A+	13.5	41.1	81.8	26.9	32.9	5.13	5.02	78	-	-	-	4.6	0.6	A/A	C/C	G/G	G/G	G/G	G/G	C/C	T/T
		LG14018	uncomplicated malaria	Dakar	18	M	SURVIVOR	0	-	-	-	-	-	-	-	-	-	-	-	-	-	-	-	G/A	C/C	G/G	G/G	G/G	G/G	C/C	T/T
		TA14072	uncomplicated malaria	Dakar	0	F	SURVIVOR	0	140	B+	16.7	49.3	-	-	-	7.2	5.36	140	-	-	-	-	-	A/A	A/C	G/G	G/G	G/G	G/G	C/C	T/T
		TA14089	uncomplicated malaria	Dakar	0	M	SURVIVOR	0	3211	O+	9.6	44.8	-	-	-	6.85	4.23	204	-	-	-	-	-	G/G	C/C	G/G	G/G	G/G	G/G	C/C	T/T
		TA14080	uncomplicated malaria	Dakar	0	M	SURVIVOR	0	731	-	-	-	-	-	-	-	-	731	-	-	-	-	-	A/A	C/C	G/G	G/G	G/G	G/G	C/C	T/T
		PS04027	uncomplicated malaria	Dakar	13	M	SURVIVOR	0	-	-	-	-	-	-	-	-	-	-	-	-	-	-	-	A/A	A/C	G/G	G/G	G/G	G/G	C/C	T/T
		PS04034	uncomplicated malaria	Dakar	-	-	SURVIVOR	0	-	-	-	-	-	-	-	-	-	-	-	-	-	-	-	G/G	A/C	G/G	G/G	A/A	G/G	C/C	T/T
		PS04009	uncomplicated malaria	Dakar	-	M	SURVIVOR	0	-	-	-	-	-	-	-	-	-	-	-	-	-	-	-	G/G	A/C	G/G	G/G	G/G	G/G	C/C	T/T
		TA14054	uncomplicated malaria	Dakar	41	F	SURVIVOR	0	160	-	10.1	32	96.9	32.1	32.6	4.76	3.2	160	-	-	-	-	-	G/G	C/C	G/G	G/G	G/A	G/G	C/C	T/T
		TA14007	uncomplicated malaria	Dakar	0.25	F	SURVIVOR	0	35	-	6.5	19.9	85.6	27.9	32.6	26.25	2.33	124	-	-	-	-	-	A/A	C/C	G/G	G/G	G/G	G/G	C/C	T/T
		PS04005	uncomplicated malaria	Dakar	-	-	SURVIVOR	0	-	-	-	-	-	-	-	-	-	-	-	-	-	-	-	G/A	A/C	G/G	G/G	G/G	G/G	C/C	T/T
		PS04047	uncomplicated malaria	Dakar	-	M	SURVIVOR	0	-	-	-	-	-	-	-	-	-	-	-	-	-	-	-	A/A	A/C	G/G	G/G	G/G	G/G	C/C	T/T
		TA14068	uncomplicated malaria	Dakar	0	M	SURVIVOR	0	1192	O+	15.2	45	-	-	-	11.63	4.57	1192	-	-	-	-	-	G/G	A/C	G/G	G/G	G/G	G/G	C/C	T/T
		TA14037	uncomplicated malaria	Dakar	0	F	SURVIVOR	0	440	0+	18	52.7	104.8	35.8	34.1	6.58	5.03	256	-	-	-	6.5	0.6	A/A	C/C	G/G	G/G	G/G	G/G	C/C	T/T
		TA14005	uncomplicated malaria	Dakar	-	-	SURVIVOR	0	966	-	10.3	31.3	88.4	29.1	32.9	2.79	3.54	59	-	-	-	-	-	A/A	C/C	G/G	G/G	G/G	G/G	C/C	T/T
		KO15043	uncomplicated malaria	Dakar	26	M	SURVIVOR	0	16650	-	14.3	43.6	84.5	27.7	32.8	4.6	5.16	162	36.3	24.6	-	-	-	A/A	A/C	G/G	G/G	G/G	G/G	C/C	T/T
		TA14026	uncomplicated malaria	Dakar	15	F	SURVIVOR	0	153	O+	9.5	28.2	88.1	29.7	33.7	6.18	3.2	318	-	-	-	2.4	0.7	A/A	C/C	G/G	G/G	G/G	G/G	C/C	T/T
		KO15032	uncomplicated malaria	Dakar	55	M	SURVIVOR	0	716	-	13.9	40.2	87.8	30.3	34.6	5.8	4.58	159	74.3	12.9	-	-	-	A/A	A/C	G/G	G/G	G/G	G/G	C/C	T/T
		TA14050	uncomplicated malaria	Dakar	0	F	SURVIVOR	0	30	O+	14.1	41.6	102.3	34.6	33.9	11.68	4.07	246	-	-	-	1.1	0.4	G/G	C/C	G/G	G/G	G/G	G/G	C/C	T/T
		TA14038	uncomplicated malaria	Dakar	53	F	SURVIVOR	0	126	-	11.1	33.1	91.8	30.7	33.5	2.82	3.61	217	-	-	-	-	-	A/A	C/C	G/G	G/G	G/G	G/G	C/C	T/T
		TA14035	uncomplicated malaria	Dakar	0	F	SURVIVOR	0	1086	0+	13.2	39.3	115.5	38.8	33.6	7.6	3.4	283	-	-	-	3.6	0.3	G/A	C/C	G/G	G/G	G/G	G/G	C/C	T/T
		PS04020	uncomplicated malaria	Dakar	-	M	SURVIVOR	0	-	-	-	-	-	-	-	-	-	-	-	-	-	-	-	A/A	A/C	G/G	G/G	G/G	G/G	C/C	T/T
		KO15020	uncomplicated malaria	Dakar	77	M	SURVIVOR	0	300	-	9.2	26.8	82.2	28.2	34.3	7.6	3.26	133	57.6	31	-	-	-	G/G	C/C	G/G	G/G	G/G	G/G	C/C	T/T
		SL14003	uncomplicated malaria	Dakar	15	F	SURVIVOR	0	490	-	12.6	37.8	-	-	-	10.6	4.95	348	-	-	-	-	-	G/A	C/C	G/G	G/G	G/G	G/G	C/C	T/T
		PS04043	uncomplicated malaria	Dakar	27	M	SURVIVOR	0	-	-	-	-	-	-	-	-	-	-	-	-	-	-	-	A/A	A/C	G/G	G/G	G/G	G/G	C/C	A/T
		KO15002	uncomplicated malaria	Dakar	20	M	SURVIVOR	0	8283	-	11.2	35.3	97.8	31	31.7	4.8	3.61	61	41.6	12.1	-	-	-	G/A	C/C	G/G	G/G	G/G	G/G	C/C	T/T
		SL14006	uncomplicated malaria	Dakar	-	M	SURVIVOR	0	1050	-	15.5	45.2	-	-	-	3.9	5.07	113	-	-	-	-	-	A/A	C/C	G/G	G/G	G/G	G/G	C/C	T/T
		TA14011	uncomplicated malaria	Dakar	13	F	SURVIVOR	0	2455	-	-	-	-	-	-	-	-	-	-	-	-	-	-	G/G	C/C	G/G	G/G	G/G	G/G	C/C	T/T
		PS04033	uncomplicated malaria	Dakar	34	F	SURVIVOR	0	-	-	-	-	-	-	-	-	-	-	-	-	-	-	-	A/A	A/C	G/G	G/G	G/G	G/G	C/C	T/T
		TA14030	uncomplicated malaria	Dakar	0	M	SURVIVOR	0	391	A+	7.6	25.4	73.8	22.1	29.9	8.51	3.44	347	-	-	-	0.8	0.4	A/A	A/C	G/G	G/G	G/G	G/G	C/C	T/T
		TA14022	uncomplicated malaria	Dakar	8	M	SURVIVOR	0	568	-	8.6	23.6	86.2	28.2	32.7	3.57	3.05	256	-	-	-	-	-	G/G	C/C	G/G	G/G	G/G	G/G	C/C	T/T
		TA14021	uncomplicated malaria	Dakar	44	M	SURVIVOR	0	242	-	12.2	35.2	93.6	32.4	34.7	6.42	3.76	159	-	-	-	-	-	G/G	C/C	G/G	G/G	G/G	G/G	C/C	T/T
		TA14029	uncomplicated malaria	Dakar	9	M	SURVIVOR	0	241	0+	9.8	29.4	87.3	29.1	33.3	5.12	3.37	113	-	-	-	7.6	0.5	A/A	C/C	G/G	G/G	G/G	G/G	C/C	T/T
		TA14086	uncomplicated malaria	Dakar	4	F	SURVIVOR	0	100	B+	9.6	26.7	-	-	-	21.3	3.75	172	-	-	-	-	-	A/A	C/C	G/G	G/G	G/G	G/G	C/C	T/T
		KO15033	uncomplicated malaria	Dakar	36	F	SURVIVOR	0	350	-	12.3	36.3	74.5	25.3	33.9	7.5	4.87	233	65.1	29.6	-	-	-	G/A	A/C	G/G	G/G	G/G	G/G	C/C	T/T
		PS04032	uncomplicated malaria	Dakar	12	M	SURVIVOR	0	-	-	-	-	-	-	-	-	-	-	-	-	-	-	-	G/G	A/C	G/G	G/G	G/G	G/G	C/C	A/T
		PS04035	uncomplicated malaria	Dakar	14	M	SURVIVOR	0	-	-	-	-	-	-	-	-	-	-	-	-	-	-	-	A/A	A/C	G/G	G/G	G/G	G/G	C/C	T/T
		PS04016	uncomplicated malaria	Dakar	-	M	SURVIVOR	0	-	-	-	-	-	-	-	-	-	-	-	-	-	-	-	G/G	C/C	G/G	G/G	G/G	G/G	C/C	T/T
		TA14006	uncomplicated malaria	Dakar	30	F	SURVIVOR	0	284	-	12.1	36.2	91.2	30.5	33.4	3.51	3.97	117	-	-	-	-	-	G/A	C/C	G/G	G/G	G/G	G/G	C/C	T/T
		TA14036	uncomplicated malaria	Dakar	0	F	SURVIVOR	0	944	A+	15.2	45.6	103.7	34.5	33.3	7.97	4.4	286	-	-	-	4.7	0.3	G/A	C/C	G/G	G/G	G/G	G/G	C/C	T/T
		TA14021	uncomplicated malaria	Dakar	44	M	SURVIVOR	0	242	-	12.2	35.2	93.6	32.4	34.7	6.42	3.76	159	-	-	-	-	-	G/G	C/C	G/G	G/G	G/G	G/G	C/C	T/T
		KO15049	uncomplicated malaria	Dakar	66	M	SURVIVOR	0	5083	-	11	34.5	73.7	23.5	31.9	10.7	4.68	431	48.5	41.9	-	-	-	A/A	A/C	G/G	G/G	G/G	G/G	C/C	T/T
		PS04006	uncomplicated malaria	Dakar	-	-	SURVIVOR	0	-	-	-	-	-	-	-	-	-	-	-	-	-	-	-	A/A	A/C	G/G	G/G	G/G	G/G	C/C	T/T
		PS13003	uncomplicated malaria	Dakar	23	F	SURVIVOR	0	56	-	-	-	-	-	-	-	-	-	-	-	-	-	-	G/A	C/C	G/G	G/G	G/G	G/G	C/C	T/T
		TA14017	uncomplicated malaria	Dakar	0	M	SURVIVOR	0	1274	-	15.7	45.7	102	35.3	34.4	4.64	4.45	198	-	-	-	-	-	A/A	C/C	G/G	G/G	G/G	G/G	C/C	T/T
		PS14002	uncomplicated malaria	Dakar	33	M	SURVIVOR	0	758	-	12.5	37.6	80	27.4	33.2	5.9	4.57	237	54.1	29.2	15.2	0.1	1.4	G/G	C/C	G/G	G/G	G/G	G/G	C/C	T/T
		PS13008	uncomplicated malaria	Dakar	18	M	SURVIVOR	0	520	A+	15.3	44.8	88	30	34.2	11.3	5.1	140	77.3	10.2	9.7	1.3	1.5	A/A	C/C	G/G	G/G	G/G	G/G	C/C	T/T
		TA14023	uncomplicated malaria	Dakar	-	-	SURVIVOR	0	457	-	7.5	22.4	107.9	36.1	33.4	9.75	2.08	155	-	-	-	-	-	G/A	C/C	G/G	G/G	G/G	G/G	C/C	T/T
		TA14067	uncomplicated malaria	Dakar	0	F	SURVIVOR	0	313	O+	13.5	39	-	-	-	16.22	3.72	313	-	-	-	-	-	G/A	C/C	G/G	G/G	G/G	G/G	C/C	T/T
		TA14065	uncomplicated malaria	Dakar	0	-	SURVIVOR	0	1163	O+	9.8	29.3	-	-	-	5.89	3.38	1163	-	-	-	-	-	G/G	A/C	G/G	G/G	G/G	G/G	C/C	T/T
		LG14016	uncomplicated malaria	Dakar	10	F	SURVIVOR	-	-	-	-	-	-	-	-	-	-	-	-					G/A	C/C	G/G	G/G	G/G	G/G	C/C	T/T
		LG14008	uncomplicated malaria	Dakar	23	F	SURVIVOR	0	320	-	10.7	38.9	76.5	21	27.5	10.3	5.09	121	-	-	-	-	-	G/G	C/C	G/G	G/G	G/G	G/G	C/C	T/T
		TA14049	uncomplicated malaria	Dakar	0	F	SURVIVOR	0	35	O-	12.9	38.6	92.5	30.9	33.4	11.78	4.17	131	-	-	-	-	-	A/A	C/C	G/G	G/G	G/G	G/G	C/C	T/T
		TA14025	uncomplicated malaria	Dakar	2	F	SURVIVOR	0	252	-	12.2	-	-	-	-	-	-	256	-	-	-	9.9	0.5	G/A	C/C	G/G	G/G	G/G	G/G	C/C	T/T
		TA14096	uncomplicated malaria	Dakar	63	-	SURVIVOR	0	140	-	14.9	44.9	-	-	-	4.37	5.34	228	-	-	-	-	-	G/G	C/C	G/G	G/G	G/G	G/G	C/C	T/T
		SL14001	uncomplicated malaria	Dakar	35	F	SURVIVOR	0	320	-	12.9	39.9	-	-	-	20.5	4.83	257	-	-	-	-	-	G/A	C/C	G/G	G/G	G/G	G/G	C/C	T/T
		TA14020	uncomplicated malaria	Dakar																				A/A	C/C	G/G	G/G	G/G	G/G	C/C	T/T
		TA14052	uncomplicated malaria	Dakar	13	F	SURVIVOR	0	137	A+	6.1	17.6	95.1	33	34.7	26.45	1.85	192	-	-	-	-	-	A/A	C/C	G/G	G/G	G/G	G/G	C/C	T/T
		TA14097	uncomplicated malaria	Dakar	-	-	SURVIVOR	0	347	-	11.9	34.9	-	-	-	4.09	3.8	110	-	-	-	-	-	A/A	C/C	G/G	G/G	G/G	G/G	C/C	T/T
		TA14084	uncomplicated malaria	Dakar	0	F	SURVIVOR	0	70	A+	15.6	45.5	-	-	-	9.3	4.8	220	-	-	-	-	-	A/A	C/C	G/G	G/G	G/G	G/G	C/C	A/T
		TA14064	uncomplicated malaria	Dakar	0	-	SURVIVOR	0	637	A+	17.1	49.9	-	-	-	4.68	4.45	637	-	-	-	-	-	G/A	C/C	G/G	G/G	G/G	G/G	C/C	T/T
		TA14003	uncomplicated malaria	Dakar	42	M	SURVIVOR	0	6880	-	13.7	41.4	89.2	29.5	33.1	5.2	4.64	47	-	-	-	-	-	A/A	C/C	G/G	G/G	G/G	G/G	C/C	T/T
		SL14002	uncomplicated malaria	Dakar	30	F	SURVIVOR	0	2000	-	8.9	27.6	-	-	-	10	3.26	263	-	-	-	-	-	G/A	A/C	G/G	G/G	G/G	G/G	C/C	A/T
		TA14051	uncomplicated malaria	Dakar	36	M	SURVIVOR	0	149	-	13.9	44.3	86.1	27	31.4	4.32	5.14	248	-	-	-	-	-	G/G	C/C	G/G	G/G	G/G	G/G	C/C	T/T
		PS13002	uncomplicated malaria	Dakar	11	F	SURVIVOR	0	321	-	-	-	-	-	-	-	-	-	-	-	-	-	-	A/A	C/C	G/G	G/G	G/G	G/G	C/C	T/T
		PS13012	uncomplicated malaria	Dakar	28	M	SURVIVOR	0	1263	A+	13.2	39.7	89	29.5	33.2	6	4.48	148	63	21.6	13.5	0.4	1.5	G/G	C/C	G/G	G/G	G/G	G/G	C/C	T/T
		TA14032	uncomplicated malaria	Dakar	0	M	SURVIVOR	0	1283	A+	14.5	45.8	97.5	30.9	31.6	7.47	4.7	161	-	-	-	5.2	0.6	A/A	C/C	G/G	G/G	G/G	G/G	C/C	T/T
		TA14116	uncomplicated malaria	Dakar	0	-	SURVIVOR	0	210	-	15.4	45.6	-	-	-	25.62	4.46	269	-	-	-	-	-	G/A	C/C	G/G	G/G	G/G	G/G	C/C	T/T
		TA14073	uncomplicated malaria	Dakar	0	M	SURVIVOR	0	440	B+	14.1	42.3	-	-	-	8.27	3.41	440	-	-	-	-	-	G/G	C/C	G/G	G/G	G/G	G/G	C/C	T/T
		SL14007	uncomplicated malaria	Dakar	-	F	SURVIVOR	0	4740	-	12.2	40.6	-	-	-	4	3.62	227	-	-	-	-	-	G/G	C/C	G/G	G/G	G/G	G/G	C/C	T/T
		TA14002	uncomplicated malaria	Dakar	0	F	SURVIVOR	0	82	-	15.3	42.8	106	37.9	35.7	10.19	4.04	347	-	-	-	-	-	G/G	C/C	G/G	G/G	G/G	G/G	C/C	T/T
		PS04004	uncomplicated malaria	Dakar	-	M	SURVIVOR	0	-	-	-	-	-	-	-	-	-	-	-	-	-	-	-	G/A	C/C	G/G	G/G	G/G	G/G	C/C	T/T
		TA14031	uncomplicated malaria	Dakar	0	F	SURVIVOR	0	45	B+	13.2	41	85.5	27.6	32.2	8.08	4.79	210	-	-	-	5.8	0.2	G/A	C/C	G/G	G/G	G/G	G/G	C/C	T/T
		TA14013	uncomplicated malaria	Dakar	7	M	SURVIVOR	0	99	-	10.8	31.6	86.8	29.7	34.2	8.6	3.64	276	-	-	-	-	-	G/G	C/C	G/G	G/G	A/A	G/G	C/C	T/T
		PS13004	uncomplicated malaria	Dakar	33	M	SURVIVOR	0	80	-	-	-	-	-	-	-	-	-	-	-	-	-	-	G/A	C/C	G/G	G/G	G/A	G/G	C/C	T/T
		PS04002	uncomplicated malaria	Dakar	-	M	SURVIVOR	0	-	-	-	-	-	-	-	-	-	-	-	-	-	-	-	A/A	C/C	G/G	G/G	G/G	G/G	C/C	T/T
		LG14015	uncomplicated malaria	Dakar	6	M	SURVIVOR	-	27120	-	10.7	30.6	79	27.4	34.8	-	-	-	-					A/A	C/C	G/G	G/G	G/G	G/G	C/C	T/T
		TA14066	uncomplicated malaria	Dakar	0	-	SURVIVOR	0	1166	O+	16.9	52.4	-	-	-	9.61	5.84	1166	-	-	-	-	-	G/G	A/C	G/G	G/G	G/G	G/G	C/C	T/T
		PS04039	uncomplicated malaria	Dakar	16	F	SURVIVOR	0	-	-	-	-	-	-	-	-	-	-	-	-	-	-	-	A/A	A/C	G/G	G/G	G/G	G/G	C/C	T/T
		DA14026	uncomplicated malaria	Dakar	7	M	SURVIVOR	0	1440	-	10.3	30.6	78.5	26.4	33.7	7.18	3.9	96	48.6	35.4	14.9	0.7	0.4	G/G	C/C	G/G	G/G	A/A	G/G	C/C	T/T
		PS04025	uncomplicated malaria	Dakar	34	M	SURVIVOR	0	-	-	-	-	-	-	-	-	-	-	-	-	-	-	-	A/A	A/C	G/G	G/G	G/G	G/G	C/C	T/T
		SL14008	uncomplicated malaria	Dakar	33	F	SURVIVOR	0	2800	-	14.3	43.1	-	-	-	20.8	5.13	267	-	-	-	-	-	G/G	C/C	G/G	G/G	G/G	G/G	C/C	T/T
		PS13009	uncomplicated malaria	Dakar	10	F	SURVIVOR	0	2800	O+	11.3	32.5	81	28.1	34.8	8.7	4.02	139	69.5	16.9	10	3.1	0.5	G/G	C/C	G/G	G/G	G/G	G/G	C/C	T/T
		TA14024	uncomplicated malaria	Dakar	-	-	SURVIVOR	0	17480	-	10.1	31.9	79.7	25.3	31.7	6.17	4	24	-	-	-	-	-	A/A	C/C	G/G	G/G	G/G	G/G	C/C	T/T
		TA14012	uncomplicated malaria	Dakar	0	M	SURVIVOR	0	188	-	14.3	44.3	110	35.6	32.3	-	4.02	148	-	-	-	-	-	G/A	C/C	G/G	G/G	G/A	G/G	C/C	T/T
		LG14005	uncomplicated malaria	Dakar	4	M	SURVIVOR	-	4000	-	10.1	29.1	74	25.8	34.8	10.1	3.93	149	-		-			A/A	A/C	G/G	G/G	G/G	G/G	C/C	T/T
		PS13014	uncomplicated malaria	Dakar	-	F	SURVIVOR	0	80	-	-	-	-	-	-	-	-	-	-	-	-	-	-	A/A	C/C	G/G	G/G	G/G	G/G	C/C	A/T
		PS04010	uncomplicated malaria	Dakar	-	F	SURVIVOR	0	-	-	-	-	-	-	-	-	-	-	-	-	-	-	-	A/A	A/C	G/G	G/G	G/G	G/G	C/C	T/T
		TA12029	uncomplicated malaria	Dakar	48	F	SURVIVOR	0	100740	A+	13.6	42.5	84.9	27.2	32	3.75	5	73	71.5	23.4	3.2	1.4	0.5	A/A	C/C	G/G	G/G	G/G	G/G	C/C	T/T
		LG14017	uncomplicated malaria	Dakar	5	M	SURVIVOR	0	-	-	-	-	-	-	-	-	-	-	-	-	-	-	-	G/G	C/C	G/G	G/G	G/G	G/G	C/C	T/T
		PS13006	uncomplicated malaria	Dakar	5	F	SURVIVOR	0	24652	-	-	-	-	-	-	-	-	-	-	-	-	-	-	A/A	C/C	G/G	G/G	G/G	G/G	C/C	T/T
		PS13010	uncomplicated malaria	Dakar	13	F	SURVIVOR	0	300	B+	12.6	38.4	82	26.8	32.8	5.2	4.71	239	50.6	38.1	2.9	6.3	2.1	G/G	C/C	G/G	G/G	G/G	G/G	C/C	T/T
		PS14003	uncomplicated malaria	Dakar	-	-	SURVIVOR	0	Négative	-	-	-	-	-	-	-	-	-	-	-	-	-	-	A/A	C/C	G/G	G/G	G/G	G/G	C/C	T/T
		TA12027	uncomplicated malaria	Dakar	47	F	SURVIVOR	0	4205	-	12.6	37.9	90.8	30.2	33.3	3.28	4.17	324	39.3	41.6	17	1.2	0.9	A/A	C/C	G/G	G/G	G/G	G/G	C/C	T/T
		LG14014	uncomplicated malaria	Dakar	6	F	SURVIVOR	0	1200	-	9.8	28.5	88	30.1	34.4	7	3.25	91	-	-	-	-	-	G/A	C/C	G/G	G/G	G/G	G/G	C/C	T/T
		PS13007	uncomplicated malaria	Dakar	18	M	SURVIVOR	0	120	A+	12.1	35.6	85	29	34	4.2	4.17	207	46.1	36.3	15	0.5	2.1	G/G	C/C	G/G	G/G	G/G	G/G	C/C	T/T
		PS13005	uncomplicated malaria	Dakar	26	F	SURVIVOR	0	4521	-	-	-	-	-	-	-	-	-	-	-	-	-	-	G/G	C/C	G/G	G/G	G/G	G/G	C/C	T/T
		PS14001	uncomplicated malaria	Dakar	-	M	SURVIVOR	0	2541	-	-	-	-	-	-	-	-	-	-	-	-	-	-	A/A	C/C	G/G	G/G	G/G	G/G	C/C	T/T
		TA12079	uncomplicated malaria	Dakar	0	F	SURVIVOR	0	558	O+	17	51.7	100.9	33.2	32.9	16.3	5.12	62	77.9	15.4	5.3	1.2	0.2	A/A	C/C	G/G	G/G	G/G	G/G	C/C	A/T
		TA12076	uncomplicated malaria	Dakar	30	F	SURVIVOR	0	207	-	11.5	34.8	88.2	29.2	33.1	3.53	3.94	303	52.5	41.9	4.1	1.1	0.4	G/A	C/C	G/G	G/G	G/G	G/G	C/C	T/T
		DA14038	uncomplicated malaria	Dakar	5	-	SURVIVOR	0	4680	-	11.3	34.9	79.1	25.6	32.4	11.14	4.41	174	81	14.1	4.7	0.1	0.1	A/A	C/C	G/G	G/G	G/G	G/G	C/C	T/T
		TA12002	uncomplicated malaria	Dakar	15	M	SURVIVOR	0	876	-	14.3	43.4	80.4	26.7	32.9	4.16	5.4	302	38.5	43.8	6.8	10.3	0.6	A/A	C/C	G/G	G/G	G/G	G/G	C/C	T/T
		DA14031	uncomplicated malaria	Dakar	12	F	SURVIVOR	0	34080	-	11	31.9	74.2	25.6	34.5	10.86	4.3	70	69.3	24.8	5.7	0.1	0.1	G/A	C/C	G/G	G/G	G/G	G/G	C/C	T/T
		TA12028	uncomplicated malaria	Dakar	16	F	SURVIVOR	0	191	-	8.6	17.1	47.5	23.9	50.3	17.01	3.6	458	79	14.6	5.8	0.5	0.1	G/A	A/C	G/A	G/G	G/G	C/C	C/C	-99
		TA12003	uncomplicated malaria	Dakar	32	M	SURVIVOR	0	7563	-	10.9	33.1	68.9	22.7	33	6.57	4.8	104	63	19.1	16.6	0.8	0.4	A/A	C/C	G/G	G/G	G/G	G/G	C/C	T/T
		PS13013	uncomplicated malaria	Dakar	11	F	SURVIVOR	0	1320	O+	11.5	34.1	79	26.7	33.7	7.5	4.3	151	88.8	8.2	0.9	1.9	0.2	A/A	C/C	G/G	G/G	G/G	G/G	C/C	T/T
		TA14091	uncomplicated malaria	Dakar																				G/A	C/C	G/G	G/G	G/G	G/G	C/C	T/T
		TA12039	uncomplicated malaria	Dakar	30	F	SURVIVOR	0	314	B+	9	25.2	95.9	34.2	35.7	5.28	2.63	157	61.2	35	1.5	2	0.3	A/A	C/C	G/G	G/G	G/G	G/G	C/C	T/T
		PS13001	uncomplicated malaria	Dakar	74	M	SURVIVOR	0	117	NEGATIVE	-	-	-	-	-	-	-	-	-	-	-	-	-	A/A	C/C	G/G	G/G	G/G	G/G	C/C	T/T
		PS14004	uncomplicated malaria	Dakar	29	M	SURVIVOR	0	350	-	14.9	44	87	29.6	33.9	6.7	5.03	297	38.9	37.6	12.4	9.5	1.6	A/A	C/C	G/G	G/G	G/G	G/G	C/C	T/T
		TA12072	uncomplicated malaria	Dakar	0.75	F	SURVIVOR	0	736	-	8.4	26.9	63.6	19.9	31.2	9.35	4.23	391	52	42.7	2.7	1.7	0.9	G/G	A/C	G/G	G/G	G/G	G/G	C/C	T/T
		TA12030	uncomplicated malaria	Dakar	49	F	SURVIVOR	0	700	-	11.1	34.2	86.2	28	32.4	2.04	3.97	141	50.8	46.4	0.8	1.9	0.1	G/A	C/C	G/G	G/G	G/G	G/G	C/C	T/T
		TA14040	uncomplicated malaria	Dakar	20	F	SURVIVOR	0	823	-	11.4	35.2	85.1	27.5	32.4	4.13	4.14	240	-	-	-	-	-	G/G	C/C	G/G	G/G	G/G	G/G	C/C	T/T
		PS14002	uncomplicated malaria	Dakar	33	M	SURVIVOR	0	758	-	12.5	37.6	80	27.4	33.2	5.9	4.57	237	54.1	29.2	15.2	0.1	1.4	G/G	C/C	G/G	G/G	G/G	G/G	C/C	A/T
		PS04045	uncomplicated malaria	Dakar	2	F	SURVIVOR	0	-	-	-	-	-	-	-	-	-	-	-	-	-	-	-	G/A	A/C	G/A	G/G	G/A	G/G	C/C	-99
		PS03004	uncomplicated malaria	Dakar	-	F	-	-	-	-	-	-	-	-	-	-	-	-	-	-	-	-	-	A/A	C/C	G/G	G/G	G/G	G/G	C/C	T/T
		PS03009	uncomplicated malaria	Dakar	-	-	-	-	-	-	-	-	-	-	-	-	-	-	-	-	-	-	-	A/A	C/C	G/G	G/G	G/G	G/G	C/C	T/T
		PS04001	uncomplicated malaria	Dakar	-	M	SURVIVOR	0	-	-	-	-	-	-	-	-	-	-	-	-	-	-	-	A/A	A/C	G/G	G/G	G/G	G/G	C/C	T/T
		PS13002	uncomplicated malaria	Dakar	11	F	SURVIVOR	0	321	-	-	-	-	-	-	-	-	-	-	-	-	-	-	A/A	A/C	G/G	G/G	G/G	G/G	C/C	A/T
		PS03010	uncomplicated malaria	Dakar	13	F	SURVIVOR	0	300	B+	12.6	38.4	82	26.8	32.8	5.2	4.71	239	50.6	38.1	2.9	6.3	2.1	A/A	C/C	G/G	G/G	G/G	G/G	C/C	T/T
		LG14009	uncomplicated malaria	Dakar	26	F	SURVIVOR	0	1200	-	14.8	47.7	85.7	26.5	31	6.2	5.57	369	-	-	-	-	-	A/A	C/C	G/G	G/G	G/G	G/G	C/C	T/T
		DA14001	uncomplicated malaria	Dakar	-	M	SURVIVOR	0	8717	-	10.9	32.1	72.3	24.5	34	8.51	4.44	147	73.5	17	9.4	0	0.1	A/A	C/C	G/G	G/G	G/G	G/G	C/C	T/T
		DA14035	uncomplicated malaria	Dakar	5	F	SURVIVOR	0	10000	-	9.1	27.3	75	25	33.3	7.4	3.64	50	62.4	27.3	9.7	0.1	0.5	-99	-99	G/G	G/G	G/G	G/G	C/C	T/T
		NP04051	severe malaria	Dakar	26	F	DEATH	9	135000	-	8.8	26.4	-	-	-	10.04	3	39	-	-	-	-	-	A/A	A/C	G/G	G/G	G/G	G/G	C/C	T/T
		NP05026	severe malaria	Dakar	9	F	SURVIVOR	3	-	-	6.9	18.5	-	-	-	8.1	2.42	39	-		-	-	-	A/A	A/A	G/G	G/G	G/G	G/G	C/C	T/T
		NP14004	severe malaria	Dakar	20	M	SURVIVOR	12	-	O+	9.7	28.4	81	-	-	11.28	3.51	28	9.99	0	-	0.79	0.44	A/A	C/C	G/G	G/G	G/G	G/G	C/C	T/T
		NP04041	severe malaria	Dakar	20	M	SURVIVOR	7	10890	-	10.2	28.8	-	-	-	9.7	3.63	42	-	-	-	-	-	A/A	A/C	G/G	G/G	G/G	G/G	C/C	T/T
		NP05005	severe malaria	Dakar	18	M	SURVIVOR	5	-	-	12.1	33.4	-	-	-	3.6	4.6	52	-		-	-	-	A/A	C/C	G/G	G/G	G/G	G/G	C/C	T/T
		NP04033	severe malaria	Dakar	51	M	SURVIVOR	6	137000	-	7.9	25	-	-	-	4.89	2.74	160	-	-	-	-	-	A/A	C/C	G/G	G/G	G/G	G/G	C/C	T/T
		NP04019	severe malaria	Dakar	12	F	SURVIVOR	4	231400	-	11	26.8	-	-	-	18.48	3.56	75	-	-	-	-	-	G/G	A/C	G/G	G/G	G/A	G/G	C/C	T/T
		NP12012	severe malaria	Dakar	52	F	DEATH	21	-	-	7.5	22.4	-	-	-	11.6	2.77	43	-	-	-	-	-	A/A	A/A	G/G	G/G	G/G	G/G	C/C	T/T
		NP14011	severe malaria	Dakar	25	M	SURVIVOR	9	-	-	8.7	26.8	82.7	-	-	5.66	3.24	471	2.6	2.75	-	0.02	0.02	A/A	C/C	G/G	G/G	G/G	G/G	C/C	T/T
		NP14001	severe malaria	Dakar	32	M	SURVIVOR	12	4502	-	5.5	16.7	93.3	-	-	11.02	1.79	80	6.76	3.03	-	0	0.09	A/A	A/C	G/G	G/G	G/G	G/G	C/C	T/T
		NP14005	severe malaria	Dakar	17	F	SURVIVOR	39	-	-	9	28.4	79	25	32	23.51	3.62	259	22.26	1	0.12	0.09	0.02	A/A	C/C	G/G	G/G	G/G	G/G	C/C	T/T
		NP14010	severe malaria	Dakar	17	M	SURVIVOR	5	-	-	10	37.7	80.7	-	-	7.74	3.93	285	3.99	2.76	-	0.09	0.08	A/A	C/C	G/G	G/G	G/G	G/G	C/C	T/T
		NP12010	severe malaria	Dakar	50	F	SURVIVOR	6	-	-	12.2	-	-	-	-	14.7	-	50	-		-	-	-	G/A	A/C	G/G	G/G	G/G	G/G	C/C	T/T
		KO15010	severe malaria	Dakar	41	F	SURVIVOR	-	10140	-	9.7	30.2	77	24.7	32.1	4.7	3.92	60	85.4	9.7	-	-	-	A/A	C/C	G/G	G/G	G/G	G/G	C/C	T/T
		NP03009	severe malaria	Dakar	38	F	DEATH	5	74700	-	8.3	24.5	-	-	-	5.7	2.49	53	-	-	-	-	-	A/A	A/C	G/G	G/G	G/G	G/G	C/C	T/T
		DA14002	severe malaria	Dakar	8	M	-	-	19500	-	10.3	-	-	-	-	11.16	4.1	53		1.45	-	0.01	0.02	A/A	C/C	G/G	G/G	G/G	G/G	C/C	T/T
		NP12006	severe malaria	Dakar	53	M	DEATH	4	-	-	-	33.1	-	-	-	-	3.88	-	-		-	-	-	A/A	A/C	G/G	G/G	G/G	G/G	C/C	T/T
		TA14105	severe malaria	Dakar	3	M	SURVIVOR	-	-	B+	7.5	-	-	-	-	8.8	2.54	205	-	-	-	-	-	A/A	C/C	G/G	G/G	G/G	G/G	C/C	T/T
		NP04024	severe malaria	Dakar	25	F	SURVIVOR	4	115500	-	14.3	40	-	-	-	3.71	5.5	76	-	-	-	-	-	A/A	A/C	G/G	G/G	G/G	G/G	T/C	T/T
		TA14044	severe malaria	Dakar	9	F	SURVIVOR	-	6365	B+	4	11.8	70	23.8	34	15.58	1.68	219	47.3	44	6.3	0.3	2.1	A/A	C/C	G/G	G/G	G/G	G/G	C/C	T/T
		KO15006	severe malaria	Dakar	65	F	SURVIVOR	-	8190	-	12.4	36.2	86	29.5	34.3	5.8	4.21	184	83.9	9.6	-	-	-	A/A	C/C	G/G	G/G	G/G	G/G	C/C	A/T
		TA14111	severe malaria	Dakar	3	M	SURVIVOR	-	30	AB+	6.3	19.8	-	-	-	15.8	3.46	699	-	-	-	-	-	A/A	A/C	G/G	G/G	G/G	G/G	C/C	T/T
		KO15001	severe malaria	Dakar	-	F	SURVIVOR	-	980	-	10.4	31.6	84.7	27.9	32.9	5.6	3.73	143	80.6	12.2	-	-	-	A/A	A/C	G/G	G/G	G/G	G/G	C/C	T/T
		NP14002	severe malaria	Dakar	32	M	SURVIVOR	12	4502	-	5.5	16.7	93.3	-	-	11.02	1.79	80	6.76	3.03	-	0	0.09	A/A	C/C	G/G	G/G	G/G	G/G	C/C	T/T
		NP14013	severe malaria	Dakar	41	M	SURVIVOR	11	-	-	11.7	3.4	90.7	-	-	19.09	3.75	67	16.39	0.82	-	0	0.01	A/A	C/C	G/G	G/G	G/G	G/G	C/C	T/T
		KO15016	severe malaria	Dakar	66	M	SURVIVOR	-	6885	-	13.3	38.8	84.7	29	34.3	2.3	4.58	5	36.3	29.6	-	-	-	A/A	A/C	G/G	G/G	G/G	G/G	C/C	A/T
		NP12007	severe malaria	Dakar	12	F	DEATH	11	-	-	11.6	33.4	-	-	-	19	4.62	40	-	-	-	-	-	G/G	A/C	G/G	G/G	G/G	G/G	C/C	T/T
		TA14059	severe malaria	Dakar	6	M	SURVIVOR	-	63714	A+	6	18.9	79.9	25.4	31.8	5.88	2.36	41	72.3	23.9	2.2	1.3	0.1	A/A	C/C	G/G	G/G	G/G	G/G	C/C	T/T
		TA14070	severe malaria	Dakar	3	F	SURVIVOR	-	70	B+	9.49	28.9	-	-	-	9.49	3.36	116	-	-	-	-	-	A/A	C/C	G/G	G/G	G/G	G/G	C/C	T/T
		DA14027	severe malaria	Dakar	6	F	-	-	800	-	12.8	-	-	-	-	5.18	4.8	255			0.77	0.03	0.01	A/A	C/C	G/G	G/G	G/G	G/G	C/C	A/T
		NP05020	severe malaria	Dakar	18	M	SURVIVOR	11	-	-	-	31.2	-	-	-	3.9	-	147	-		-	-	-	-99	-99	G/G	G/G	G/G	G/G	C/C	T/T
		TA14092	severe malaria	Dakar	6	F	SURVIVOR	-	-	O+	3.8	-	-	-	-	30.5	1.3	164	-	-	-	-	-	G/A	C/C	G/G	G/G	G/G	G/G	C/C	T/T
		TA14106	severe malaria	Dakar	14	F	SURVIVOR	-	184	A+	7.1	22.1	-	-	-	21.02	2.95	303	-	-	-	-	-	A/A	A/C	G/G	G/G	G/G	G/G	C/C	T/T
		KO15007	severe malaria	Dakar	18	F	SURVIVOR	-	15018	-	14.2	42.1	79.6	26.8	33.7	4.9	5.29	60	52.6	34.6	-	-	-	A/A	A/C	G/G	G/G	G/G	G/G	C/C	A/T
		KO15012	severe malaria	Dakar	5	M	SURVIVOR	-	2880	-	10.1	29.2	84.9	29.4	34.6	8	3.44	77	59.7	21.7	-	-	-	A/A	C/C	G/G	G/G	G/G	G/G	C/C	T/T
		LG14003	severe malaria	Dakar	10	M	SURVIVOR	-	38000	-	5.8	16	73	26.2	36	6.9	2.19	39	-	-	-	-	-	A/A	C/C	G/G	G/G	G/G	G/G	C/C	T/T
		NP04014	severe malaria	Dakar	23	M	SURVIVOR	6	156090	-	10.5	30.6	-	-	-	11.26	3.63	38	-	-	-	-	-	A/A	A/C	G/G	G/G	G/G	G/G	C/C	T/T
		NP13005	severe malaria	Dakar	44	M	SURVIVOR	6	0	-	15.9	-	-	-	-	-	-	-	-	-	-	-	-	A/A	C/C	G/G	G/G	G/G	G/G	C/C	T/T
		KO15019	severe malaria	Dakar	30	F	SURVIVOR	-	8225	-	12.6	36.9	83.3	28.4	34.1	6.3	4.43	113	74.7	16	-	-	-	G/G	A/C	G/G	G/G	G/G	G/G	C/C	T/T
		NP12001	severe malaria	Dakar	20	M	SURVIVOR	-	-	-	-	-	-	-	-	-	-	-	-	-	-	-	-	G/G	A/A	G/G	G/G	G/G	G/G	C/C	T/T
		NP13021	severe malaria	Dakar	79	F	SURVIVOR	5	71	-	11.3	-	81.2	-	-	5.66	-	60	-	-	-	-	-	G/A	C/C	G/G	G/G	G/G	G/G	C/C	T/T
		KO15017	severe malaria	Dakar	3	F	SURVIVOR	-	15567	-	11	32.2	81.5	27.8	34.2	17.7	3.95	38	83	14.1	-	-	-	A/A	A/C	G/G	G/G	G/G	G/G	C/C	T/T
		NP04013	severe malaria	Dakar	15	M	SURVIVOR	5	250750	-	11.5	34	-	-	-	11.58	4.25	25	-	-	-	-	-	G/G	A/C	G/G	G/G	G/G	G/G	C/C	T/T
		TA14039	severe malaria	Dakar	2	M	SURVIVOR	-	549	O+	6.4	20.8	8.1	24.9	30.7	7.99	2.57	287	36.2	47.1	14.6	0.6	1.4	A/A	A/C	G/G	G/G	G/G	G/G	C/C	T/T
		NP04054	severe malaria	Dakar	48	F	DEATH	5	44800	-	10.5	33.3	-	-	-	3.76	4.48	330	-	-	-	-	-	A/A	A/C	G/G	G/G	G/G	G/G	C/C	T/T
		TA14042	severe malaria	Dakar	13	F	SURVIVOR	-	36	O+	3.5	11.4	86.5	26.5	30.7	19.64	1.32	297	87.4	9.3	2.6	0.4	0.3	G/A	C/C	G/G	G/G	G/G	G/G	C/C	T/T
		KO15009	severe malaria	Dakar	3	F	SURVIVOR	-	30188	-	4.9	16.4	76.3	22.8	29.9	27.9	2.15	77	53.9	32.8	-	-	-	G/A	A/C	G/G	G/G	G/G	G/G	C/C	T/T
		KO15018	severe malaria	Dakar	18	F	SURVIVOR	-	3288	-	14.3	41.7	83.7	28.7	34.3	14.5	4.98	156	87.5	7.5	-	-	-	G/A	C/C	G/G	G/G	G/G	G/G	C/C	T/T
		NP12011	severe malaria	Dakar	50	M	SURVIVOR	17	-	-	11.1	-	-	-	-	3.7	-	86	-		-	-	-	A/A	A/C	G/G	G/G	G/G	G/G	C/C	T/T
		TA14071	severe malaria	Dakar	7	M	SURVIVOR	-	48	O-	2.7	7	-	-	-	22.75	0.86	161	-	-	-	-	-	G/G	A/C	G/G	G/G	G/G	G/G	C/C	T/T
		NP05018	severe malaria	Dakar	25	M	DEATH	15	-	-	11.2	31.9	-	-	-	14.2	37.4	37.8	-		-	-	-	A/A	A/A	G/G	G/G	G/G	G/G	C/C	T/T
		NP13024	severe malaria	Dakar	31	M	SURVIVOR	5	-	-	8.5	33.5	82.1	-	-	-	-	-	-	-	-	-	-	A/A	C/C	G/G	G/G	G/G	G/G	C/C	T/T
		TA14014	severe malaria	Dakar	50	F	SURVIVOR	-	457	-	8.7	26	84.1	28.2	33.5	4.25	3.09	162	-	-	-	-	-	A/A	A/C	G/G	G/G	G/G	G/G	C/C	T/T
		LG14004	severe malaria	Dakar	6	M	SURVIVOR	-	32000	-	5.6	16.6	67	22.8	22.8	6.1	2.47	89	-	-	-	-	-	A/A	C/C	G/G	G/G	G/G	G/G	C/C	T/T
		NP13016	severe malaria	Dakar	21	F	SURVIVOR	18	482	-	9.1	25.2	81.8	-	-	18.48	-	40	-	-	-	-	-	A/A	C/C	G/G	G/G	G/G	G/G	C/C	T/T
		LG14007	severe malaria	Dakar	51	F	SURVIVOR	-	33000	-	13.9	45.3	90.5	27.7	30.6	4.3	5.01	288	-	-	-	-	-	A/A	A/C	G/G	G/G	G/G	G/G	C/C	T/T
		DA14006	severe malaria	Dakar	-	M	-	-	18400	-	4.8	-	-	-	-	48.09	2.13	87		-	-	0.16	0.11	G/G	C/C	G/G	G/G	G/G	G/G	C/C	A/T
		KO15015	severe malaria	Dakar	30	F	SURVIVOR	-	15818	-	7	20.2	86	29.8	34.7	33	2.35	245	85.1	12	-	-	-	G/G	A/C	G/G	G/G	G/G	G/G	C/C	A/T
		TA14095	severe malaria	Dakar	2	-	SURVIVOR	-	121	O+	7.6	22.6	-	-	-	9.3	2.57	98	-	-	-	-	-	A/A	A/C	G/G	G/G	G/G	G/G	C/C	T/T
		DA14036	severe malaria	Dakar	12	M	-	-	78240	-	11.8	-	-	-	-	3.7	4.19	30			0.11	0.01	0.01	G/G	A/C	G/G	G/G	G/G	G/G	C/C	T/T
		TA14094	severe malaria	Dakar	7	F	SURVIVOR	-	120	B+	8.9	25.3	-	-	-	6.75	3.3	125	-	-	-	-	-	A/A	A/C	G/G	G/G	G/G	G/G	C/C	T/T
		NP04038	severe malaria	Dakar	38	F	SURVIVOR	39	119680	-	4.8	22	-	-	-	16.08	1.76	108	-	-	-	-	-	G/G	A/C	G/G	G/G	G/G	G/G	C/C	T/T
		NP13020	severe malaria	Dakar	30	F	DEATH	3	10181	-	-	-	-	-	-	-	-	-	-	-	-	-	-	G/G	C/C	G/G	G/G	G/G	G/G	C/C	T/T
		LG14012	severe malaria	Dakar	27	M	SURVIVOR	-	51000	-	14.3	42.9	79.6	26.5	33.3	8.7	5.39	45	-	-	-	-	-	A/A	C/C	G/G	G/G	G/G	G/G	C/C	T/T
		TA14057	severe malaria	Dakar	14	F	SURVIVOR	-	28205	O+	7.5	24	66.1	20.7	31.3	5.55	3.63	79	50.7	30.8	17.4	0.3	0.8	G/A	C/C	G/G	G/G	G/G	G/G	C/C	T/T
		LG14006	severe malaria	Dakar	7	F	SURVIVOR	-	3320	-	7.9	25.1	80.6	25.3	31.4	8.3	3.12	229	-	-	-	-	-	G/G	C/C	G/G	G/G	G/A	G/G	C/C	A/T
		TA12031	severe malaria	Dakar	0	-	SURVIVOR	-	1728	O+	16.5	48.5	100.3	34.1	34	11.2	4.8	34	63.7	26.6	9.1	0.3	0.3	G/A	C/C	G/G	G/G	G/G	G/G	C/C	T/T
		LG14010	severe malaria	Dakar	36	M	SURVIVOR	-	24000	-	15	51.6	83.7	24.3	29	7.2	6.17	204	-	-	-	-	-	A/A	C/C	G/G	G/G	G/G	G/G	C/C	T/T
		KO15008	severe malaria	Dakar	24	F	SURVIVOR	-	16551	-	13.7	40.2	82.2	28	34.1	4	4.89	60	79.8	17	-	-	-	A/A	A/C	G/G	G/G	G/G	G/G	C/C	A/T
		TA14078	severe malaria	Dakar	3	F	SURVIVOR	-	-	AB+	5	17.4				9	2.76	222	-	-	-	-	-	G/G	C/C	G/G	G/G	G/G	G/G	C/C	T/T
		NP13013	severe malaria	Dakar	22	M	SURVIVOR	16	0	-	12.6	-	86.6	-	-	12.98	-	283	-	-	-	-	-	A/A	C/C	G/G	G/G	G/G	G/G	C/C	T/T
		TA14045	severe malaria	Dakar	4	F	SURVIVOR	-	80	B+	4	12.5	75.1	24.1	32.1	9.77	1.66	115	29.7	63.3	4.5	1.7	0.8	A/A	C/C	G/G	G/G	G/G	G/G	C/C	T/T
		KO15014	severe malaria	Dakar	5	M	SURVIVOR	-	4000	-	9.1	26.5	75.1	25.8	34.3	7.1	3.53	48	33.8	38.3	-	-	-	A/A	A/C	G/G	G/G	G/G	G/G	C/C	T/T
		TA12081	severe malaria	Dakar	0	F	SURVIVOR	-	1195	O+	20.4	59	105	36.4	34.4	8.89	5.6	103	46.2	45.2	6.1	2.3	0.2	G/G	C/C	G/G	G/G	G/G	G/G	C/C	T/T
		DA14017	severe malaria	Dakar	3	M	-	-	2520	-	14	-	-	-	-	90.1	5.85	191		3.17	2.08	0.06	0.02	A/A	C/C	G/G	G/G	G/G	G/G	C/C	A/T
		NP05017	severe malaria	Dakar	43	M	SURVIVOR	3	-	-	12.8	35.4	-	-	-	-	3.9	57	-		-	-	-	-99	-99	-99	G/G	G/G	G/G	C/C	T/T
		KO15022	severe malaria	Dakar	5	M	SURVIVOR	-	30750	-	12.5	37.2	80.5	27.1	33.6	10.3	4.62	90	73.2	16.3	-	-	-	G/G	A/C	G/G	G/G	G/G	G/G	C/C	T/T
		NP12018	severe malaria	Dakar					-	-		-	-	-	-	-	-	-	-	-	-	-	-	A/A	C/C	G/G	G/G	G/G	G/G	C/C	A/T
		TA14099	severe malaria	Dakar	26	-	SURVIVOR	-	40	O+	9.3	27.3	-	-	-	6.29	2.97	62	-	-	-	-	-	A/A	A/C	G/G	G/G	G/G	G/G	C/C	A/T
		TA14085	severe malaria	Dakar	40	M	SURVIVOR	0	-	O+	2.7						0.88	98						A/A	C/C	G/G	G/G	G/G	G/G	C/C	T/T
		LG14002	severe malaria	Dakar	9	M	SURVIVOR	-	32000	-	2.6	7.4	72	-	-	13.9	1.03	95	-	-	-	-	-	A/A	A/C	G/G	G/G	G/G	G/G	C/C	T/T
		TA14088	severe malaria	Dakar	2	M	SURVIVOR	-	41655	O+	5.4	15.2	-	-	-	18.19	2.11	97	-	-	-	-	-	G/G	C/C	G/G	G/G	G/G	G/G	C/C	T/T
		TA14056	severe malaria	Dakar	2	M	SURVIVOR	-	2480	B+	5.3	16.3	60.9	19.9	32.6	9.91	2.67	114	31.7	54.9	10.6	1.2	1.6	A/A	C/C	G/G	G/G	G/G	G/G	C/C	T/T
		NP14003	severe malaria	Dakar	59	F	SURVIVOR	17	10000	-	8.3	25.8	80.6	-	-	7.53	3.2	115	5.85	1.45	-	0	0.02	A/A	C/C	G/G	G/G	G/G	G/G	C/C	T/T
		TA14018	severe malaria	Dakar	-	M	SURVIVOR	-	1047	-	9.6	30.1	75	23.9	31.9	4.84	4.01	201	-	-	-	-	-	G/G	A/C	G/G	G/G	G/G	G/G	C/C	T/T
		NP13015	severe malaria	Dakar	25	F	SURVIVOR	12	200	-	8.3	-	83.9	-	-	9.89	-	-	-	-	-	-	-	G/A	C/C	G/G	G/G	G/G	G/G	C/C	T/T
		NP13019	severe malaria	Dakar	61	M	SURVIVOR	6	90	-	10.5	-	82.6	-	-	9.61	-	120	-	-	-	-	-	G/G	C/C	G/G	G/G	G/G	G/G	C/C	T/T
		NP04025	severe malaria	Dakar	45	M	SURVIVOR	7	195780	-	11	35.5	-	-	-	12.6	5.02	467	-	-	-	-	-	A/A	A/C	G/G	G/G	G/G	G/G	C/C	T/T
		TA14034	severe malaria	Dakar	3	F	SURVIVOR	-	0	O+	3.3	10.1	82.3	26.8	32.6	18.62	1.23	230	88.2	8.5	2.7	0.4	0.2	G/A	C/C	G/G	G/G	G/G	G/G	C/C	T/T
		KO15011	severe malaria	Dakar	3	F	SURVIVOR	-	1294	-	10.9	32.1	74.8	25.4	34	11.4	4.29	68	44.7	46	-	-	-	G/G	C/C	G/G	G/G	G/G	G/G	C/C	T/T
		LG14001	severe malaria	Dakar	7	M	SURVIVOR	-	30000	-	12.4	34.9	79	28.1	35.7	12	4.43	45	-	-	-	-	-	A/A	A/C	G/G	G/G	G/G	G/G	C/C	T/T
		TA14061	severe malaria	Dakar	15	M	SURVIVOR	-	971	A+	7.4	22.8	56.1	18.2	32.5	7.44	4.06	52	66.6	24	8.3	0.4	0.7	A/A	C/C	G/G	G/G	G/G	G/G	C/C	A/T
		TA14016	severe malaria	Dakar	5	F	SURVIVOR	-	360	-	7.9	24.3	75.5	24.5	32.5	4.84	3.22	69	-	-	-	-	-	A/A	A/C	G/G	G/G	G/G	G/G	C/C	T/T
		TA14074	severe malaria	Dakar	4	F	SURVIVOR	-	-	O+	5.4	15.9				24.4	1.81	144	-	-	-	-	-	A/A	C/C	G/G	G/G	G/G	G/G	C/C	T/T
		NP04034	severe malaria	Dakar	31	M	SURVIVOR	11	316140	-	14.1	41.2	-	-	-	6.15	4.79	71	-	-	-	-	-	A/A	A/C	G/G	G/G	G/G	G/G	C/C	T/T
		NP14009	severe malaria	Dakar	66	M	DEATH	1	0	-	-	38.5	83.7	-	-	16.37	4.6	29	13.35	1.22	-	0.01	0.13	A/A	C/C	G/G	G/G	G/G	G/G	C/C	T/T
		TA14009	severe malaria	Dakar	12	M	SURVIVOR	0	218	-	4.8	14.7	90.3	29.4	32.6	8.19	1.68	101	-	-	-	-	-	G/G	C/C	G/G	G/G	A/A	G/G	C/C	T/T
		NP13006	severe malaria	Dakar	34	F	exclu	7	0	-	10.5	-	85.4	-	-	9.84	-	76	-	-	-	-	-	A/A	C/C	G/G	G/G	G/G	G/G	C/C	T/T
		NP13011	severe malaria	Dakar	26	F	DEATH	3	13106	-	8.7	-	82.1	-	-	29.22	-	18	-	-	-	-	-	G/A	C/C	G/G	G/G	G/G	G/G	C/C	T/T
		TA14053	severe malaria	Dakar	15	M	SURVIVOR	-	197	B+	6.3	17.5	70.2	25.3	36	6.4	2.49	76	91.9	5.4	2	0.5	0.2	G/G	C/C	G/G	G/G	G/G	G/G	C/C	T/T
		TA12012	severe malaria	Dakar	4	M	SURVIVOR	-	949	O+	8.3	23.6	70.8	24.9	35.2	12.41	3.33	87	53.5	38.4	7.3	0.3	0.5	A/A	C/C	G/G	G/G	G/G	G/G	C/C	T/T
		DA14010	severe malaria	Dakar	7	M	-	-	6240	-	8.8	-	-	-	-	10.99	3.59	86		2.39	0.32	0.06	0.03	G/G	C/C	G/G	G/G	A/A	G/G	C/C	T/T
		DA14024	severe malaria	Dakar	10	M	-	-	2080	-	4.7	-	-	-	-	16.77	1.66	622		5.43	2.7	0.06	0.06	A/A	C/C	G/G	G/G	G/G	G/G	C/C	T/T
		TA12009	severe malaria	Dakar	6	M	SURVIVOR	-	1177	-	12.1	36.2	78.4	26.2	33.4	23.33	4.62	161	70.6	16.9	11.8	0.2	0.5	A/A	C/C	G/G	G/G	G/G	G/G	C/C	T/T
		TA12001	severe malaria	Dakar	6	M	SURVIVOR	-	12800	A+	6.6	19.4	76.8	26.1	34	9.16	2.53	103	58.3	35.1	5.4	0.7	0.5	A/A	C/C	G/G	G/G	G/G	G/G	C/C	T/T
		NP04059	severe malaria	Dakar	25	F	DEATH	10	77400	-	11.1	33.4	-	-	-	15.03	5.16	467	-	-	-	-	-	A/A	A/C	G/G	G/G	G/G	G/C	C/C	A/T
		LG14013	severe malaria	Dakar	13	M	SURVIVOR	-	44800	-	8.2	23.5	83	29.2	35.1	10.1	2.82	59	-	-	-	-	-	A/A	C/C	G/G	G/G	G/G	G/G	C/C	T/T
		NP13007	severe malaria	Dakar	21	F	exclu	12	0	-	6.7	32	88.2	-	-	4.93	-	-	-	-	-	-	-	G/A	C/C	G/G	G/G	G/G	G/G	C/C	T/T
		TA12018	severe malaria	Dakar	1	F	SURVIVOR	-	266	B+	7.5	22.5	69.3	23.1	33.3	12.09	3.25	79	44.9	48.5	5.2	0.9	0.5	G/A	C/C	G/G	G/G	G/G	G/G	C/C	T/T
		NP13008	severe malaria	Dakar	30	M	SURVIVOR	7	0	-	10.6	-	82.8	-	-	7.75	-	69	-	-	-	-	-	A/A	C/C	G/G	G/G	G/G	G/G	C/C	T/T
		KO15005	severe malaria	Dakar	15	M	SURVIVOR	-	33194	-	4.7	14.1	70.9	23.6	33.3	17.5	1.99	22	69.6	23.9	-	-	-	G/G	A/C	G/G	G/G	G/G	G/G	C/C	A/T
		TA12040	severe malaria	Dakar	0	F	SURVIVOR	-	2355	B+	13.5	45	127	38.1	30	20.86	3.54	322	74.1	22.6	2.1	0.9	0.3	G/A	C/C	G/G	G/G	G/G	G/G	C/C	T/T
		DA14039	severe malaria	Dakar	1.5	F	-	-	24080	-	4.9	-	-	-	-	19.45	2.24	76			-	0.01	0.03	A/A	C/C	G/G	G/G	G/G	G/G	C/C	T/T
		TA12005	severe malaria	Dakar	1	M	SURVIVOR	-	7047	O+	4.3	12.7	73.1	24.7	33.8	10.31	1.74	103	40.6	4.9	8.8	0.1	1.6	G/G	C/C	G/G	G/G	G/G	G/G	C/C	T/T
		TA12025	severe malaria	Dakar	4	M	SURVIVOR	-	30759	-	4.2	13.3	75.1	23.7	31.6	17.2	1.8	31.6	78.1	16.8	2.9	1.8	0.4	A/A	C/C	G/G	G/G	G/G	G/G	C/C	T/T
		NP13010	severe malaria	Dakar	22	M	DEATH	15	60	-	8	-	77.4	-	-	11.19	-	-	-	-	-	-	-	A/A	C/C	G/G	G/G	G/G	G/G	C/C	T/T
		NP04055	severe malaria	Dakar	19	M	DEATH	2	86020	-	7.9	24.9	-	-	-	27.95	3.74	219	-	-	-	-	-	A/A	A/C	G/G	G/G	G/G	G/G	C/C	T/T
		NP14007	severe malaria	Dakar	21	M	SURVIVOR	7	-	-	10.7	30.9	80.5	-	-	18.5	3.84	76	14.23	2.16	-	0.07	0.05	A/A	C/C	G/G	G/G	G/G	G/G	C/C	T/T
		NP13009	severe malaria	Dakar	30	M	-	-	-	-	-	-	87.1	-	-	10.82	-	59	-	-	-	-	-	A/A	C/C	G/G	G/G	G/G	G/G	C/C	T/T
		TA12007	severe malaria	Dakar	2.5	F	SURVIVOR	-	945	A+	4.7	12.7	85.4	31.5	36.9	13.87	1.49	25	-	-	-	-	-	A/A	C/C	G/G	G/G	G/G	G/G	C/C	T/T
		TA14122	severe malaria	Dakar	14	F	SURVIVOR	-	-	-	-	-	-	-	-	-	-	-	-	-	-	-	-	G/A	C/C	G/G	G/G	G/A	G/G	C/C	T/T
		NP04028	severe malaria	Dakar	74	F	DEATH	2	0	-	9	20	-	-	-	18.9	2.99	187	-	-	-	-	-	G/G	A/C	G/G	G/G	G/G	G/G	C/C	T/T
		NP05024	severe malaria	Dakar	35	M	SURVIVOR	11	-	-	-	36.8	-	-	-	7.6	4.15	131	-		-	-	-	G/G	A/C	G/G	G/G	G/G	G/G	C/C	A/T
		NP05002	severe malaria	Dakar	18	M	DEATH	-	-	-	12.7	36.7	-	-	-	13.7	4.4	135	-	-	-	-	-	G/G	C/C	G/G	G/G	G/G	G/G	C/C	T/T
		NP05015	severe malaria	Dakar	16	F	SURVIVOR	9	-	-	10.3	31.9	-	-	-	8.4	3.5	256	-		-	-	-	G/A	C/C	G/G	G/G	G/G	G/G	C/C	T/T
		NP05006	severe malaria	Dakar	50	M	DEATH	1	-	-	11.2	29.7	-	-	-	87	2.95	3.1	-		-	-	-	A/A	A/C	G/G	G/G	G/G	G/G	C/C	T/T
		NP05025	severe malaria	Dakar	17	F	DEATH	6	-	-	5.7	16.9	-	-	-	9.8	2.22	53	-		-	-	-	A/A	A/C	G/G	G/G	G/G	G/G	C/C	T/T
		NP05018	severe malaria	Dakar	25	M	DEATH	15	-	-	11.2	31.9	-	-	-	14.2	37.4	37.8	-		-	-	-	A/A	C/C	G/G	G/G	G/G	G/G	C/C	T/T
		NP13022	severe malaria	Dakar	15	M	DEATH	4	330	-	9.7	-	84.8	-	-	4.92	-	30	-	-	-	-	-	A/A	C/C	G/G	G/G	G/G	G/G	C/C	T/T
		TA14122	severe malaria	Dakar	14	F	SURVIVOR	-	-	-	-	-	-	-	-	-	-	-	-	-	-	-	-	A/A	C/C	G/G	G/G	G/G	G/G	C/C	T/T
		TA14053	severe malaria	Dakar	15	M	SURVIVOR	-	197	B+	6.3	17.5	70.2	25.3	36	6.4	2.49	76	91.9	5.4	2	0.5	0.2	A/A	C/C	G/G	G/G	G/G	G/G	C/C	T/T
		NP05019	severe malaria	Dakar	70	M	SURVIVOR	5	-	-	13.9	42.5	-	-	-	9.4	4.9	70	-		-	-	-	A/A	A/A	G/G	G/G	G/G	G/G	C/C	T/T
		NP05021	severe malaria	Dakar	35	M	SURVIVOR	14	-	-	8.1	24.2	-	-	-	2.81	8.1	46	-	-	-	-	-	A/A	A/C	G/G	G/G	G/G	G/G	C/C	T/T
		TA12004	severe malaria	Dakar	8	M	SURVIVOR	-	116000	O+	11.5	34.4	64.4	21.5	33.4	6.5	5.34	37	64.3	25.2	7.7	0.2	2.6	A/A	C/C	G/G	G/G	G/G	G/G	C/C	T/T
